# Supplementary material
Source: publisher site journal article supplement (https://www.dovepress.com/article/156582)
Supplement: Supplementary file 1 [file get_supplementary_file.php]

| Accession | Gene Name | Description                                                                                 | Coverage    | # Peptides | # PSMs | # Unique Peptides | # AAs | MW [kDa] | calc. pl | Abundances Control-2 | Abundances Control-1 | Abundances MYCT1-2 | Abundances MYCT1-1 | Average Control | Average MYCT1 | MYCT1/Control | P value (Significance A) |
|-----------|-----------|---------------------------------------------------------------------------------------------|-------------|------------|--------|-------------------|-------|----------|----------|----------------------|----------------------|--------------------|--------------------|-----------------|---------------|---------------|--------------------------|
| F8W059    | UNC13A    | Protein unc-13 homolog A<br>OS=Homo sapiens GN=UNC13A<br>PE=1 SV=1                          | 0.580720093 | 1          | 1      | 1                 | 1722  | 195.007  | 5.38     | 27                   | 23.8                 | 168.1              | 181.1              | 25.4            | 174.6         | 6.87402       | 5.33E-48                 |
| Q9HD89    | RETN      | Resistin OS=Homo sapiens<br>GN=RETN PE=1 SV=1                                               | 16.66666667 | 1          | 1      | 1                 | 108   | 11.411   | 6.86     | 43.1                 | 38                   | 139.3              | 179.7              | 40.55           | 159.5         | 3.93342       | 6.72E-25                 |
| P05109    | S100A8    | Protein S100-A8 OS=Homo<br>sapiens GN=S100A8 PE=1 SV=1                                      | 23.65591398 | 2          | 2      | 2                 | 93    | 10.828   | 7.03     | 61.1                 | 58.6                 | 72.7               | 207.6              | 59.85           | 140.15        | 2.34169       | 2.09E-10                 |
| B2RNT7    | KLHDC5    | Kelch domain containing 5<br>OS=Homo sapiens GN=KLHDC5<br>PE=2 SV=1                         | 1.782178218 | 1          | 1      | 1                 | 505   | 56.831   | 5.74     | 66.5                 | 56                   | 163.6              | 113.9              | 61.25           | 138.75        | 2.26531       | 1.05E-09                 |
| K7EQR9    | ILF3      | Interleukin enhancer-binding factor<br>3 (Fragment) OS=Homo sapiens<br>GN=ILF3 PE=1 SV=1    | 51.66666667 | 8          | 23     | 1                 | 180   | 19.576   | 8.27     | 66.9                 | 60.8                 | 148.6              | 123.7              | 63.85           | 136.15        | 2.13234       | 1.69E-08                 |
| Q5QJ74    | TBCEL     | Tubulin-specific chaperone<br>cofactor E-like protein OS=Homo<br>sapiens GN=TBCEL PE=1 SV=2 | 2.122641509 | 1          | 1      | 1                 | 424   | 48.164   | 5.38     | 56.6                 | 74.5                 | 131.2              | 137.8              | 65.55           | 134.5         | 2.05187       | 8.87E-08                 |
| Q9NRD8    | DUOX2     | Dual oxidase 2 OS=Homo sapiens<br>GN=DUOX2 PE=1 SV=2                                        | 0.452196382 | 1          | 1      | 1                 | 1548  | 175.253  | 7.85     | 53.7                 | 80.1                 | 98.8               | 167.4              | 66.9            | 133.1         | 1.98954       | 3.16E-07                 |
| D6RB49    | DTHD1     | Death domain-containing protein 1<br>OS=Homo sapiens GN=DTHD1<br>PE=1 SV=1                  | 0.852618758 | 1          | 1      | 1                 | 821   | 92.739   | 7.05     | 70.5                 | 63.6                 | 151.9              | 113.9              | 67.05           | 132.9         | 1.9821        | 3.68E-07                 |
| B7Z8Q2    |           | cDNA FLJ55606, highly similar to<br>Alpha-2-HS-glycoprotein<br>OS=Homo sapiens PE=2 SV=1    | 1.616628176 | 1          | 2      | 1                 | 433   | 46.597   | 6.28     | 45.6                 | 90.5                 | 102.5              | 161.4              | 68.05           | 131.95        | 1.93902       | 8.76E-07                 |
| Q9BWD1    | ACAT2     | Acetyl-CoA acetyltransferase,<br>cytosolic OS=Homo sapiens<br>GN=ACAT2 PE=1 SV=2            | 38.28715365 | 11         | 16     | 11                | 397   | 41.324   | 6.92     | 71.1                 | 65.8                 | 144                | 119.1              | 68.45           | 131.55        | 1.92184       | 1.24E-06                 |
| B2R4M6    |           | Protein S100 OS=Homo sapiens<br>PE=2 SV=1                                                   | 7.01754386  | 1          | 2      | 1                 | 114   | 13.202   | 6.13     | 66.9                 | 70.6                 | 85.8               | 176.7              | 68.75           | 131.25        | 1.90909       | 1.59E-06                 |

|                |                     |                                                                                                                            |             |   |    |   |      |         |       |      |      |       |       |       |        |         |          |
|----------------|---------------------|----------------------------------------------------------------------------------------------------------------------------|-------------|---|----|---|------|---------|-------|------|------|-------|-------|-------|--------|---------|----------|
| O43677         | NDUFC<br>1          | NADH dehydrogenase<br>[ubiquinone] 1 subunit C1,<br>mitochondrial OS=Homo sapiens<br>GN=NDUFC1 PE=3 SV=1                   | 14.47368421 | 1 | 1  | 1 | 76   | 8.729   | 10.2  | 65.4 | 72.4 | 126   | 136.2 | 68.9  | 131.1  | 1.90276 | 1.81E-06 |
| A1L497         | ANKRD<br>26         | ANKRD26 protein OS=Homo<br>sapiens GN=ANKRD26 PE=2<br>SV=1                                                                 | 0.405561993 | 1 | 1  | 1 | 1726 | 198.09  | 5.68  | 54.5 | 83.4 | 100.6 | 161.6 | 68.95 | 131.1  | 1.90138 | 1.86E-06 |
| B4DU44         |                     | Involucrin OS=Homo sapiens<br>PE=2 SV=1                                                                                    | 6.722689076 | 3 | 3  | 3 | 595  | 69.562  | 4.6   | 68.1 | 70.4 | 189   | 72.4  | 69.25 | 130.7  | 1.88736 | 2.45E-06 |
| A0A024R<br>AP2 | HMGCR               | 3-hydroxy-3-methylglutaryl<br>coenzyme A reductase OS=Homo<br>sapiens GN=HMGCR PE=3 SV=1                                   | 9.797297297 | 7 | 9  | 7 | 888  | 97.413  | 6.74  | 70.8 | 69.4 | 109.5 | 150.3 | 70.1  | 129.9  | 1.85307 | 4.83E-06 |
| A0A0A7K<br>U15 | TSC1-<br>PDGFR<br>B | TSC1-PDGFEF fusion protein<br>(Fragment) OS=Homo sapiens<br>GN=TSC1-PDGFRB fusion PE=2<br>SV=1                             | 0.795947902 | 1 | 1  | 1 | 1382 | 154.474 | 6.04  | 65.1 | 75.2 | 135   | 124.7 | 70.15 | 129.85 | 1.85103 | 5.02E-06 |
| I3L1P4         | PELP1               | Proline-, glutamic acid- and<br>leucine-rich protein 1 (Fragment)<br>OS=Homo sapiens GN=PELP1<br>PE=1 SV=1                 | 44.59459459 | 4 | 12 | 1 | 148  | 15.056  | 10.68 | 74.2 | 66.2 | 141.4 | 118.2 | 70.2  | 129.8  | 1.849   | 5.23E-06 |
| Q8NH19         | OR10A<br>G1         | Olfactory receptor 10AG1<br>OS=Homo sapiens GN=OR10AG1<br>PE=2 SV=1                                                        | 2.325581395 | 1 | 1  | 1 | 301  | 34.081  | 8.78  | 72.8 | 68.1 | 135.4 | 123.7 | 70.45 | 129.55 | 1.83889 | 6.37E-06 |
| Q9UBW8         | COPS7<br>A          | COP9 signalosome complex<br>subunit 7a OS=Homo sapiens<br>GN=COPS7A PE=1 SV=1                                              | 12          | 3 | 5  | 3 | 275  | 30.258  | 8.22  | 64.6 | 76.6 | 105.4 | 153.4 | 70.6  | 129.4  | 1.83286 | 7.16E-06 |
| Q6GMX4         | IGL@                | IGL@ protein OS=Homo sapiens<br>GN=IGL@ PE=1 SV=1                                                                          | 3.389830508 | 1 | 1  | 1 | 236  | 24.794  | 6.89  | 61   | 80.2 | 98.8  | 160   | 70.6  | 129.4  | 1.83286 | 7.16E-06 |
| A0A024R9<br>44 | SERPIN<br>C1        | Serpin peptidase inhibitor, clade C<br>(Antithrombin), member 1, isoform<br>CRA_a OS=Homo sapiens<br>GN=SERPINC1 PE=3 SV=1 | 3.448275862 | 2 | 2  | 2 | 464  | 52.569  | 6.71  | 63.6 | 78   | 88.9  | 169.5 | 70.8  | 129.2  | 1.82486 | 8.37E-06 |

|        |               |                                                                                                                    |             |    |    |   |      |         |      |      |      |       |       |       |        |         |          |
|--------|---------------|--------------------------------------------------------------------------------------------------------------------|-------------|----|----|---|------|---------|------|------|------|-------|-------|-------|--------|---------|----------|
| F5GXR3 | PTMS          | Parathyrosin OS=Homo sapiens<br>GN=PTMS PE=1 SV=1                                                                  | 10.57692308 | 1  | 1  | 1 | 104  | 12.067  | 11   | 75.8 | 66.6 | 142.4 | 115.2 | 71.2  | 128.8  | 1.80899 | 1.14E-05 |
| P14324 | FDPS          | Farnesyl pyrophosphate synthase<br>OS=Homo sapiens GN=FDPS<br>PE=1 SV=4                                            | 16.70644391 | 7  | 13 | 7 | 419  | 48.245  | 6.15 | 73.1 | 69.7 | 140.1 | 117.2 | 71.4  | 128.65 | 1.80182 | 1.31E-05 |
| O15040 | TECPR2        | Tectonin beta-propeller repeat-<br>containing protein 2 OS=Homo<br>sapiens GN=TECPR2 PE=1 SV=4                     | 0.708717222 | 1  | 1  | 1 | 1411 | 153.751 | 5.55 | 78.1 | 65.2 | 145.1 | 111.6 | 71.65 | 128.35 | 1.79135 | 1.60E-05 |
| P0CB47 | UBTFL1        | Upstream-binding factor 1-like<br>protein 1 OS=Homo sapiens<br>GN=UBTFL1 PE=3 SV=1                                 | 1.781170483 | 1  | 1  | 1 | 393  | 46.105  | 9.48 | 75.2 | 69.2 | 142.5 | 113.1 | 72.2  | 127.8  | 1.77008 | 2.41E-05 |
| Q9H6M4 |               | cDNA: FLJ22098 fis, clone<br>HEP17040 (Fragment) OS=Homo<br>sapiens PE=2 SV=1                                      | 7.418397626 | 4  | 4  | 1 | 674  | 75.246  | 9.52 | 76   | 68.7 | 136.9 | 118.4 | 72.35 | 127.65 | 1.76434 | 2.69E-05 |
| D6RF35 | GC            | Vitamin D-binding protein<br>OS=Homo sapiens GN=GC PE=1<br>SV=1                                                    | 6.302521008 | 2  | 6  | 2 | 476  | 52.986  | 5.52 | 64.3 | 80.7 | 97.1  | 157.9 | 72.5  | 127.5  | 1.75862 | 3.00E-05 |
| Q9ULC5 | ACSL5         | Long-chain-fatty-acid--CoA ligase<br>5 OS=Homo sapiens GN=ACSL5<br>PE=1 SV=1                                       | 18.15519766 | 10 | 14 | 9 | 683  | 75.942  | 6.92 | 70.6 | 74.6 | 125.2 | 129.6 | 72.6  | 127.4  | 1.75482 | 3.22E-05 |
| Q96RT7 | TUBGC<br>P6   | Gamma-tubulin complex<br>component 6 OS=Homo sapiens<br>GN=TUBGCP6 PE=1 SV=3                                       | 1.539307312 | 1  | 1  | 1 | 1819 | 200.372 | 6.32 | 69.4 | 75.9 | 130.1 | 124.6 | 72.65 | 127.35 | 1.75293 | 3.34E-05 |
| P42261 | GRIA1         | Glutamate receptor 1 OS=Homo<br>sapiens GN=GRIA1 PE=1 SV=2                                                         | 0.993377483 | 1  | 3  | 1 | 906  | 101.441 | 7.71 | 79   | 66.6 | 140.7 | 113.8 | 72.8  | 127.25 | 1.74794 | 3.67E-05 |
| Q9NZJ4 | SACS          | Sacsin OS=Homo sapiens<br>GN=SACS PE=1 SV=2                                                                        | 0.283904783 | 1  | 3  | 1 | 4579 | 520.795 | 7.05 | 78.4 | 67.5 | 155.7 | 98.4  | 72.95 | 127.05 | 1.7416  | 4.14E-05 |
| Q6NSI1 | ANKRD<br>26P1 | Putative ankyrin repeat domain-<br>containing protein 26-like protein<br>OS=Homo sapiens<br>GN=ANKRD26P1 PE=5 SV=2 | 3.115264798 | 1  | 1  | 1 | 321  | 35.415  | 5.39 | 80.1 | 66.1 | 140.9 | 112.9 | 73.1  | 126.9  | 1.73598 | 4.60E-05 |

|            |        |                                                                                                                       |             |   |   |   |      |         |      |      |      |       |       |       |        |         |             |
|------------|--------|-----------------------------------------------------------------------------------------------------------------------|-------------|---|---|---|------|---------|------|------|------|-------|-------|-------|--------|---------|-------------|
| Q99928     | GABRG3 | Gamma-aminobutyric acid receptor subunit gamma-3 OS=Homo sapiens GN=GABRG3 PE=2 SV=2                                  | 2.569593148 | 1 | 1 | 1 | 467  | 54.253  | 7.52 | 75.3 | 71   | 133.5 | 120.2 | 73.15 | 126.85 | 1.73411 | 4.76E-05    |
| J3QS13     | PSMD11 | 26S proteasome non-ATPase regulatory subunit 11 (Fragment) OS=Homo sapiens GN=PSMD11 PE=1 SV=1                        | 48.88888889 | 4 | 8 | 1 | 90   | 10.074  | 8.43 | 76.4 | 70.5 | 138.1 | 115   | 73.45 | 126.55 | 1.72294 | 5.88E-05    |
| Q01581     | HMGCS1 | Hydroxymethylglutaryl-CoA synthase, cytoplasmic OS=Homo sapiens GN=HMGCS1 PE=1 SV=2                                   | 10.96153846 | 5 | 5 | 5 | 520  | 57.257  | 5.41 | 74.3 | 72.6 | 123.3 | 129.8 | 73.45 | 126.55 | 1.72294 | 5.88E-05    |
| Q86W25     | NLRP13 | NACHT, LRR and PYD domains-containing protein 13 OS=Homo sapiens GN=NLRP13 PE=2 SV=2                                  | 0.67114094  | 1 | 1 | 1 | 1043 | 118.807 | 5.66 | 82.3 | 65.2 | 140.2 | 112.3 | 73.75 | 126.25 | 1.71186 | 7.23E-05    |
| A0A0S2Z3Z5 | CASP10 | Caspase 10 apoptosis-related cysteine peptidase isoform 1 (Fragment) OS=Homo sapiens GN=CASP10 PE=2 SV=1              | 3.0651341   | 1 | 1 | 1 | 522  | 58.956  | 6.62 | 75.4 | 72.9 | 122.6 | 129.1 | 74.15 | 125.85 | 1.69724 | 9.49E-05    |
| A0A087WUG8 | TTL11  | Tubulin polyglutamylase TTL11 (Fragment) OS=Homo sapiens GN=TTL11 PE=4 SV=1                                           | 12.12121212 | 1 | 2 | 1 | 66   | 7.615   | 9.72 | 73.2 | 75.2 | 143   | 108.7 | 74.2  | 125.85 | 1.69609 | 9.70E-05    |
| Q9H6X2     | ANTXR1 | Anthrax toxin receptor 1 OS=Homo sapiens GN=ANTXR1 PE=1 SV=2                                                          | 12.41134752 | 6 | 7 | 6 | 564  | 62.749  | 7.61 | 78   | 70.9 | 124   | 127.1 | 74.45 | 125.55 | 1.68637 | 0.000116064 |
| P63313     | TMSB10 | Thymosin beta-10 OS=Homo sapiens GN=TMSB10 PE=1 SV=2                                                                  | 31.81818182 | 1 | 4 | 1 | 44   | 5.023   | 5.36 | 59.6 | 90.4 | 137.5 | 112.4 | 75    | 124.95 | 1.666   | 0.000168728 |
| O60658     | PDE8A  | High affinity cAMP-specific and IBMX-insensitive 3',5'-cyclic phosphodiesterase 8A OS=Homo sapiens GN=PDE8A PE=1 SV=2 | 1.809408926 | 1 | 1 | 1 | 829  | 93.245  | 6.11 | 79.7 | 71.4 | 134.1 | 114.8 | 75.55 | 124.45 | 1.64725 | 0.000237322 |
| H0Y948     | AFDN   | Protein AFDN (Fragment) OS=Homo sapiens GN=AFDN PE=1 SV=1                                                             | 4.188481675 | 2 | 2 | 2 | 191  | 20.664  | 8.98 | 76   | 75.3 | 130.2 | 118.5 | 75.65 | 124.35 | 1.64375 | 0.000252836 |

|            |         |                                                                                              |             |    |    |   |      |         |      |      |      |       |       |       |        |         |             |
|------------|---------|----------------------------------------------------------------------------------------------|-------------|----|----|---|------|---------|------|------|------|-------|-------|-------|--------|---------|-------------|
| Q8NDM7     | CFAP43  | Cilia- and flagella-associated protein 43 OS=Homo sapiens GN=CFAP43 PE=2 SV=3                | 0.42042042  | 1  | 2  | 1 | 1665 | 191.861 | 5.99 | 79.7 | 72   | 143.7 | 104.5 | 75.85 | 124.1  | 1.63612 | 0.000290156 |
| I3L3A6     | PRSS36  | Polyserase-2 (Fragment) OS=Homo sapiens GN=PRSS36 PE=4 SV=1                                  | 28.57142857 | 1  | 1  | 1 | 28   | 2.989   | 7.25 | 86.2 | 65.7 | 136.3 | 111.8 | 75.95 | 124.05 | 1.63331 | 0.000305218 |
| B4DPP6     |         | cDNA FLJ54371, highly similar to Serum albumin OS=Homo sapiens PE=2 SV=1                     | 10.03236246 | 7  | 41 | 7 | 618  | 70.317  | 6.09 | 72.5 | 79.8 | 101.6 | 146.1 | 76.15 | 123.85 | 1.6264  | 0.000345556 |
| Q14512     | FGFBP1  | Fibroblast growth factor-binding protein 1 OS=Homo sapiens GN=FGFBP1 PE=1 SV=1               | 24.78632479 | 4  | 4  | 4 | 234  | 26.247  | 9.1  | 80   | 72.6 | 125.1 | 122.3 | 76.3  | 123.7  | 1.62123 | 0.000378994 |
| Q14680     | MELK    | Maternal embryonic leucine zipper kinase OS=Homo sapiens GN=MELK PE=1 SV=3                   | 3.533026114 | 2  | 2  | 2 | 651  | 74.594  | 8.72 | 75.4 | 78.3 | 128.6 | 117.7 | 76.85 | 123.15 | 1.60247 | 0.000528945 |
| Q5TCU3     | TPM2    | Tropomyosin beta chain OS=Homo sapiens GN=TPM2 PE=1 SV=1                                     | 33.09859155 | 10 | 21 | 1 | 284  | 32.795  | 4.68 | 73.4 | 80.4 | 115.7 | 130.5 | 76.9  | 123.1  | 1.60078 | 0.000544995 |
| Q9GZM7     | TINAGL1 | Tubulointerstitial nephritis antigen-like OS=Homo sapiens GN=TINAGL1 PE=1 SV=1               | 2.141327623 | 1  | 1  | 1 | 467  | 52.353  | 6.99 | 76.4 | 77.6 | 131.8 | 114.2 | 77    | 123    | 1.5974  | 0.000578455 |
| A0A024R577 | TM7SF2  | Transmembrane 7 superfamily member 2, isoform CRA_a OS=Homo sapiens GN=TM7SF2 PE=4 SV=1      | 4.306220096 | 2  | 3  | 2 | 418  | 46.375  | 8.87 | 79.8 | 74.4 | 123.9 | 121.9 | 77.1  | 122.9  | 1.59403 | 0.000613801 |
| Q96F63     | CCDC97  | Coiled-coil domain-containing protein 97 OS=Homo sapiens GN=CCDC97 PE=1 SV=1                 | 3.206997085 | 1  | 1  | 1 | 343  | 38.923  | 4.59 | 79.2 | 75.2 | 84.5  | 161.2 | 77.2  | 122.85 | 1.59132 | 0.00064377  |
| B1N7B9     |         | Cryocryoglobulin CC2 lambda light chain variable region (Fragment) OS=Homo sapiens PE=2 SV=1 | 12.72727273 | 1  | 2  | 1 | 110  | 11.308  | 7.97 | 75.8 | 78.6 | 110.4 | 135.2 | 77.2  | 122.8  | 1.59067 | 0.000651131 |

|                |                        |                                                                                                             |             |    |     |    |      |         |      |      |      |       |       |       |        |         |             |
|----------------|------------------------|-------------------------------------------------------------------------------------------------------------|-------------|----|-----|----|------|---------|------|------|------|-------|-------|-------|--------|---------|-------------|
| A0A0U4B<br>CF5 |                        | Complement factor I OS=Homo sapiens PE=2 SV=1                                                               | 3.608247423 | 2  | 2   | 2  | 582  | 65.286  | 7.85 | 74.7 | 79.8 | 106.7 | 138.9 | 77.25 | 122.8  | 1.58964 | 0.000663002 |
| D6RFG8         | DCK                    | Deoxycytidine kinase OS=Homo sapiens GN=DCK PE=1 SV=1                                                       | 8.832807571 | 2  | 2   | 2  | 317  | 36.741  | 5.43 | 71.5 | 83   | 106.3 | 139.2 | 77.25 | 122.75 | 1.589   | 0.00067057  |
| Q6MZX7         | DKFZp6<br>86M242<br>18 | Putative uncharacterized protein DKFZp686M24218 OS=Homo sapiens GN=DKFZp686M24218 PE=2 SV=1                 | 5.25210084  | 1  | 5   | 1  | 476  | 52.387  | 7.77 | 56.7 | 98   | 83.7  | 161.7 | 77.35 | 122.7  | 1.5863  | 0.000703064 |
| P49327         | FASN                   | Fatty acid synthase OS=Homo sapiens GN=FASN PE=1 SV=3                                                       | 30.06770211 | 60 | 108 | 60 | 2511 | 273.254 | 6.44 | 79.7 | 75   | 130.6 | 114.7 | 77.35 | 122.65 | 1.58565 | 0.000711064 |
| P31151         | S100A7                 | Protein S100-A7 OS=Homo sapiens GN=S100A7 PE=1 SV=4                                                         | 10.89108911 | 1  | 1   | 1  | 101  | 11.464  | 6.77 | 87.2 | 67.5 | 76.2  | 169.1 | 77.35 | 122.65 | 1.58565 | 0.000711064 |
| B2R950         |                        | cDNA, FLJ94213, highly similar to Homo sapiens pregnancy-zone protein (PZP), mRNA OS=Homo sapiens PE=2 SV=1 | 2.834008097 | 4  | 12  | 2  | 1482 | 163.768 | 6.38 | 82.8 | 72.1 | 128.1 | 117   | 77.45 | 122.55 | 1.58231 | 0.000753798 |
| Q969U7         | PSMG2                  | Proteasome assembly chaperone 2 OS=Homo sapiens GN=PSMG2 PE=1 SV=1                                          | 3.409090909 | 1  | 1   | 1  | 264  | 29.377  | 6.98 | 71.4 | 83.7 | 130.7 | 114.2 | 77.55 | 122.45 | 1.57898 | 0.000798885 |
| H3BUA5         |                        | Uncharacterized protein (Fragment) OS=Homo sapiens PE=4 SV=2                                                | 5           | 1  | 5   | 1  | 140  | 15.542  | 8.76 | 80.7 | 74.5 | 126.8 | 118   | 77.6  | 122.4  | 1.57732 | 0.000822346 |
| Q4LE36         | ACLY                   | ACLY variant protein (Fragment) OS=Homo sapiens GN=ACLY variant protein PE=2 SV=1                           | 41.7766051  | 42 | 74  | 42 | 1137 | 124.477 | 8.03 | 82   | 74.1 | 127.5 | 116.4 | 78.05 | 121.95 | 1.56246 | 0.00106386  |
| Q96GX5         | MASTL                  | Serine/threonine-protein kinase greatwall OS=Homo sapiens GN=MASTL PE=1 SV=1                                | 2.730375427 | 2  | 2   | 1  | 879  | 97.257  | 5.99 | 81.8 | 74.3 | 144.2 | 99.7  | 78.05 | 121.95 | 1.56246 | 0.00106386  |
| O15554         | KCNN4                  | Intermediate conductance calcium-activated potassium channel protein 4 OS=Homo sapiens GN=KCNN4 PE=1 SV=1   | 7.259953162 | 3  | 3   | 3  | 427  | 47.665  | 9.83 | 77.9 | 78.7 | 112.8 | 130.6 | 78.3  | 121.7  | 1.55428 | 0.00122461  |

|                |        |                                                                                         |             |    |    |    |     |        |       |      |      |       |       |       |        |         |            |
|----------------|--------|-----------------------------------------------------------------------------------------|-------------|----|----|----|-----|--------|-------|------|------|-------|-------|-------|--------|---------|------------|
| P29401         | TKT    | Transketolase OS=Homo sapiens<br>GN=TKT PE=1 SV=3                                       | 52.32744783 | 27 | 95 | 27 | 623 | 67.835 | 7.66  | 80.1 | 76.5 | 128.9 | 114.4 | 78.3  | 121.65 | 1.55364 | 0.00123809 |
| P01591         | JCHAIN | Immunoglobulin J chain OS=Homo sapiens<br>GN=JCHAIN PE=1 SV=4                           | 6.289308176 | 1  | 2  | 1  | 159 | 18.087 | 5.24  | 69.3 | 87.5 | 104.1 | 139.1 | 78.4  | 121.6  | 1.55102 | 0.00129491 |
| A0A024R1<br>A4 | UBE2L3 | Ubiquitin-conjugating enzyme E2L3, isoform CRA_a OS=Homo sapiens<br>GN=UBE2L3 PE=3 SV=1 | 22.07792208 | 3  | 3  | 3  | 154 | 17.85  | 8.51  | 77.4 | 79.7 | 133.9 | 109.1 | 78.55 | 121.5  | 1.54679 | 0.00139211 |
| Q01638         | IL1RL1 | Interleukin-1 receptor-like 1 OS=Homo sapiens<br>GN=IL1RL1 PE=1 SV=4                    | 1.258992806 | 1  | 2  | 1  | 556 | 63.317 | 8.35  | 82.4 | 74.8 | 124.8 | 118   | 78.6  | 121.4  | 1.54453 | 0.00144672 |
| O75459         | PAGE1  | P antigen family member 1 OS=Homo sapiens<br>GN=PAGE1 PE=1 SV=2                         | 13.01369863 | 1  | 3  | 1  | 146 | 16.14  | 4.22  | 80.5 | 76.8 | 119.6 | 123.1 | 78.65 | 121.35 | 1.54291 | 0.00148713 |
| BOYJ28         | IL18   | Interleukin-18 OS=Homo sapiens<br>GN=IL18 PE=3 SV=1                                     | 41.4507772  | 6  | 10 | 6  | 193 | 22.293 | 4.84  | 75.9 | 81.5 | 130.1 | 112.5 | 78.7  | 121.3  | 1.5413  | 0.00152857 |
| R9S3C3         | p14ARF | p14ARF/p16INK4a fusion protein OS=Homo sapiens<br>GN=p14ARF PE=2 SV=1                   | 11.76470588 | 2  | 2  | 1  | 170 | 18.52  | 11.68 | 68.4 | 89   | 116.2 | 126.4 | 78.7  | 121.3  | 1.5413  | 0.00152857 |
| A0A140V<br>K56 |        | Transaldolase OS=Homo sapiens<br>PE=2 SV=1                                              | 43.91691395 | 17 | 24 | 17 | 337 | 37.516 | 6.81  | 85.1 | 72.5 | 130.7 | 111.7 | 78.8  | 121.2  | 1.53807 | 0.00161462 |
| A0A024R0<br>L5 | GSK3A  | Glycogen synthase kinase 3 alpha, isoform CRA_a OS=Homo sapiens<br>GN=GSK3A PE=3 SV=1   | 15.73498965 | 5  | 8  | 1  | 483 | 50.949 | 8.75  | 61.6 | 96.2 | 127.9 | 114.3 | 78.9  | 121.1  | 1.53485 | 0.00170508 |
| Q6IAX1         | FDFT1  | FDFT1 protein OS=Homo sapiens<br>GN=FDFT1 PE=2 SV=1                                     | 36.93045564 | 14 | 42 | 14 | 417 | 48.084 | 6.54  | 81.5 | 77   | 120.5 | 120.9 | 79.25 | 120.7  | 1.52303 | 0.00208117 |
| Q16222         | UAP1   | UDP-N-acetylhexosamine pyrophosphorylase OS=Homo sapiens<br>GN=UAP1 PE=1 SV=3           | 1.340996169 | 1  | 1  | 1  | 522 | 58.732 | 6.33  | 88.6 | 69.9 | 133.2 | 108.2 | 79.25 | 120.7  | 1.52303 | 0.00208117 |
| P20073         | ANXA7  | Annexin A7 OS=Homo sapiens<br>GN=ANXA7 PE=1 SV=3                                        | 25.40983607 | 11 | 20 | 11 | 488 | 52.706 | 5.68  | 86   | 72.6 | 128.6 | 112.9 | 79.3  | 120.75 | 1.5227  | 0.00209271 |
| Q13907         | IDI1   | Isopentenyl-diphosphate Delta-isomerase 1 OS=Homo sapiens<br>GN=IDI1 PE=1 SV=2          | 50.66079295 | 8  | 13 | 8  | 227 | 26.302 | 6.34  | 78.5 | 80.2 | 129.7 | 111.6 | 79.35 | 120.65 | 1.52048 | 0.00217206 |

|        |             |                                                                                                                                                    |             |   |   |   |      |         |       |      |      |       |       |       |        |         |            |
|--------|-------------|----------------------------------------------------------------------------------------------------------------------------------------------------|-------------|---|---|---|------|---------|-------|------|------|-------|-------|-------|--------|---------|------------|
| G3V5L9 | DLST        | Dihydrolypoyllysine-residue succinyltransferase component of 2-oxoglutarate dehydrogenase complex, mitochondrial OS=Homo sapiens GN=DLST PE=1 SV=1 | 8.181818182 | 1 | 1 | 1 | 110  | 12.844  | 11.68 | 75.6 | 83.3 | 114   | 127   | 79.45 | 120.5  | 1.51668 | 0.00231467 |
| Q8IZU8 | DSEL        | Dermatan-sulfate epimerase-like protein OS=Homo sapiens GN=DSEL PE=2 SV=2                                                                          | 1.155115512 | 1 | 1 | 1 | 1212 | 139.149 | 8.32  | 88.6 | 70.3 | 127.9 | 113.1 | 79.45 | 120.5  | 1.51668 | 0.00231467 |
| D3DRR6 | ITIH2       | Inter-alpha (Globulin) inhibitor H2, isoform CRA_a OS=Homo sapiens GN=ITIH2 PE=4 SV=1                                                              | 5.068637804 | 5 | 6 | 5 | 947  | 106.502 | 6.95  | 69.6 | 89.7 | 102.6 | 138.1 | 79.65 | 120.35 | 1.51099 | 0.00254501 |
| Q8WXI2 | CNKSR2      | Connector enhancer of kinase suppressor of ras 2 OS=Homo sapiens GN=CNKSR2 PE=1 SV=1                                                               | 0.773694391 | 1 | 1 | 1 | 1034 | 117.461 | 6.79  | 78   | 81.4 | 135.4 | 105.2 | 79.7  | 120.3  | 1.50941 | 0.00261254 |
| H0Y300 | HP          | Haptoglobin OS=Homo sapiens GN=HP PE=1 SV=4                                                                                                        | 6.561085973 | 3 | 3 | 3 | 442  | 49.074  | 6.64  | 72.2 | 87.2 | 97.1  | 143.5 | 79.7  | 120.3  | 1.50941 | 0.00261254 |
| M0R2J8 | DCDC1       | Doublecortin domain-containing protein 1 OS=Homo sapiens GN=DCDC1 PE=1 SV=1                                                                        | 0.448681997 | 1 | 1 | 1 | 1783 | 200.465 | 8.9   | 82.6 | 76.9 | 124.5 | 116   | 79.75 | 120.25 | 1.50784 | 0.00268168 |
| P02795 | MT2A        | Metallothionein-2 OS=Homo sapiens GN=MT2A PE=1 SV=1                                                                                                | 65.57377049 | 3 | 5 | 3 | 61   | 6.037   | 7.83  | 68.6 | 91.2 | 122.6 | 117.6 | 79.9  | 120.1  | 1.50313 | 0.00289916 |
| Q5T765 | IFIT3       | Interferon-induced protein with tetratricopeptide repeats 3, isoform CRA_a OS=Homo sapiens GN=IFIT3 PE=2 SV=1                                      | 7.142857143 | 3 | 4 | 3 | 490  | 55.95   | 5.2   | 80.4 | 79.7 | 125.6 | 114.3 | 80.05 | 119.95 | 1.49844 | 0.00313247 |
| G9BZK0 |             | Glyceraldehyde-3-phosphate dehydrogenase (Fragment) OS=Homo sapiens PE=2 SV=1                                                                      | 27.5        | 1 | 1 | 1 | 40   | 4.574   | 7.42  | 87.3 | 72.8 | 127.4 | 112.5 | 80.05 | 119.95 | 1.49844 | 0.00313247 |
| V9HWD8 | HEL-S-163pA | Epididymis secretory sperm binding protein Li 163pA OS=Homo sapiens GN=HEL-S-163pA PE=2 SV=1                                                       | 1.414141414 | 1 | 1 | 1 | 495  | 54.22   | 5.86  | 78.6 | 81.5 | 103.6 | 136.3 | 80.05 | 119.95 | 1.49844 | 0.00313247 |



|        |           |                                                                                          |             |    |     |    |      |         |      |       |      |       |       |       |        |         |            |
|--------|-----------|------------------------------------------------------------------------------------------|-------------|----|-----|----|------|---------|------|-------|------|-------|-------|-------|--------|---------|------------|
| Q15800 | MSMO1     | Methylsterol monooxygenase 1<br>OS=Homo sapiens GN=MSMO1<br>PE=1 SV=1                    | 15.01706485 | 4  | 8   | 4  | 293  | 35.193  | 7.23 | 92.6  | 67.9 | 123   | 116.6 | 80.25 | 119.8  | 1.49283 | 0.00343466 |
| H0Y786 | NEB       | Nebulin (Fragment) OS=Homo sapiens GN=NEB PE=1 SV=1                                      | 0.29930163  | 1  | 1   | 1  | 3007 | 348.736 | 9.11 | 86.1  | 74.5 | 127   | 112.4 | 80.3  | 119.7  | 1.49066 | 0.00355926 |
| P06733 | ENO1      | Alpha-enolase OS=Homo sapiens GN=ENO1 PE=1 SV=2                                          | 66.8202765  | 24 | 134 | 21 | 434  | 47.139  | 7.39 | 83    | 77.8 | 126.6 | 112.6 | 80.4  | 119.6  | 1.48756 | 0.00374418 |
| Q9UGM1 | CHRNA9    | Neuronal acetylcholine receptor subunit alpha-9 OS=Homo sapiens GN=CHRNA9 PE=1 SV=2      | 1.461377871 | 1  | 1   | 1  | 479  | 54.772  | 6.47 | 100.1 | 60.8 | 143.2 | 95.9  | 80.45 | 119.55 | 1.48602 | 0.00383984 |
| P31947 | SFN       | 14-3-3 protein sigma OS=Homo sapiens GN=SFN PE=1 SV=1                                    | 47.58064516 | 12 | 32  | 8  | 248  | 27.757  | 4.74 | 80.4  | 80.6 | 126.3 | 112.6 | 80.5  | 119.45 | 1.48385 | 0.00397773 |
| V9HWA9 | HEL-S-62p | Epididymis secretory sperm binding protein Li 62p OS=Homo sapiens GN=HEL-S-62p PE=2 SV=1 | 12.86831028 | 20 | 53  | 20 | 1663 | 187.03  | 6.4  | 72.2  | 88.9 | 99.5  | 139.4 | 80.55 | 119.45 | 1.48293 | 0.0040378  |
| Q15813 | TBCE      | Tubulin-specific chaperone E OS=Homo sapiens GN=TBCE PE=1 SV=1                           | 1.897533207 | 1  | 1   | 1  | 527  | 59.309  | 6.76 | 76.5  | 84.7 | 118.6 | 120.3 | 80.6  | 119.45 | 1.48201 | 0.00409866 |
| A9UF07 | BCR/ABL   | BCR/ABL fusion protein isoform Y5 OS=Homo sapiens GN=BCR/ABL fusion PE=2 SV=1            | 1.061452514 | 1  | 1   | 1  | 1790 | 196.451 | 8.4  | 76.5  | 84.8 | 108.4 | 130.4 | 80.65 | 119.4  | 1.48047 | 0.0042024  |
| A8K7T0 | KYNU      | Kynureninase OS=Homo sapiens GN=KYNU PE=2 SV=1                                           | 16.77419355 | 6  | 10  | 6  | 465  | 52.335  | 6.83 | 84.3  | 77.1 | 128.7 | 110   | 80.7  | 119.35 | 1.47893 | 0.00430849 |
| Q5EBL4 | RILPL1    | RILP-like protein 1 OS=Homo sapiens GN=RILPL1 PE=1 SV=1                                  | 3.225806452 | 1  | 1   | 1  | 403  | 47.079  | 5.21 | 77.1  | 84.4 | 106   | 132.6 | 80.75 | 119.3  | 1.4774  | 0.00441699 |
| Q0VDG5 | SCRN3     | SCRN3 protein OS=Homo sapiens GN=SCRN3 PE=2 SV=1                                         | 3.755868545 | 1  | 1   | 1  | 426  | 48.808  | 5.55 | 95.8  | 66.4 | 122.6 | 115.3 | 81.1  | 118.95 | 1.46671 | 0.00524772 |
| Q53F11 |           | tRNA isopentenyltransferase 1 variant (Fragment) OS=Homo sapiens PE=2 SV=1               | 2.355460385 | 1  | 1   | 1  | 467  | 52.695  | 8.03 | 81.6  | 80.6 | 119.9 | 117.9 | 81.1  | 118.9  | 1.46609 | 0.00529988 |
| A8K9L8 |           | cDNA FLJ76964, highly similar to Homo sapiens tropomodulin 2                             | 1.994301994 | 1  | 2   | 1  | 351  | 39.585  | 5.27 | 68.7  | 93.7 | 104.9 | 132.7 | 81.2  | 118.8  | 1.46305 | 0.00556404 |

|                |              |                                                                                                                                                                                         |             |    |    |    |      |         |      |      |      |       |       |       |        |         |            |  |
|----------------|--------------|-----------------------------------------------------------------------------------------------------------------------------------------------------------------------------------------|-------------|----|----|----|------|---------|------|------|------|-------|-------|-------|--------|---------|------------|--|
|                |              | (neuronal) (TMOD2), mRNA<br>OS=Homo sapiens PE=2 SV=1                                                                                                                                   |             |    |    |    |      |         |      |      |      |       |       |       |        |         |            |  |
| A0A024QZ<br>F8 | EMP3         | Epithelial membrane protein 3<br>OS=Homo sapiens GN=EMP3<br>PE=3 SV=1                                                                                                                   | 8.588957055 | 1  | 2  | 1  | 163  | 18.417  | 7.96 | 79.7 | 83   | 114   | 123.3 | 81.35 | 118.65 | 1.45851 | 0.00598237 |  |
| HOYAH0         | PCDH7        | Protocadherin-7 (Fragment)<br>OS=Homo sapiens GN=PCDH7<br>PE=1 SV=1                                                                                                                     | 2.241195304 | 1  | 1  | 1  | 937  | 102.47  | 5.4  | 82.1 | 80.7 | 144.9 | 92.2  | 81.4  | 118.55 | 1.45639 | 0.00618808 |  |
| A0A0G2J<br>PR0 | C4A          | Complement C4-A OS=Homo<br>sapiens GN=C4A PE=4 SV=1                                                                                                                                     | 7.339449541 | 12 | 18 | 12 | 1744 | 192.754 | 7.03 | 78.6 | 84.3 | 101.1 | 136   | 81.45 | 118.55 | 1.45549 | 0.00627664 |  |
| P52209         | PGD          | 6-phosphogluconate<br>dehydrogenase, decarboxylating<br>OS=Homo sapiens GN=PGD<br>PE=1 SV=3                                                                                             | 29.60662526 | 13 | 18 | 13 | 483  | 53.106  | 7.23 | 81.7 | 81.3 | 124   | 112.9 | 81.5  | 118.45 | 1.45337 | 0.00649142 |  |
| A8K6N3         |              | cDNA FLJ76886, highly similar to<br>Homo sapiens loss of<br>heterozygosity, 11, chromosomal<br>region 2, gene A (LOH11CR2A),<br>transcript variant 1, mRNA<br>OS=Homo sapiens PE=2 SV=1 | 2.798982188 | 2  | 2  | 2  | 786  | 86.46   | 6.58 | 73.6 | 89.6 | 114.2 | 122.7 | 81.6  | 118.45 | 1.45159 | 0.00667721 |  |
| F4MH14         | UTY          | Ubiquitously transcribed<br>tetratricopeptide repeat protein Y-<br>linked transcript variant 205<br>OS=Homo sapiens GN=UTY PE=2<br>SV=1                                                 | 1.166666667 | 2  | 2  | 2  | 600  | 67.254  | 7.43 | 83.7 | 79.5 | 127.6 | 109.2 | 81.6  | 118.4  | 1.45098 | 0.00674227 |  |
| Q8TBQ9         | TMEM1<br>67A | Protein kish-A OS=Homo sapiens<br>GN=TMEM167A PE=1 SV=1                                                                                                                                 | 12.5        | 1  | 1  | 1  | 72   | 8.054   | 8.95 | 77.6 | 85.9 | 129.5 | 106.9 | 81.75 | 118.2  | 1.44587 | 0.00730852 |  |
| V9HWC9         | HEL-S-<br>44 | Superoxide dismutase [Cu-Zn]<br>OS=Homo sapiens GN=HEL-S-44<br>PE=2 SV=1                                                                                                                | 13.63636364 | 2  | 9  | 2  | 154  | 15.926  | 6.13 | 83.6 | 80.1 | 126   | 110.3 | 81.85 | 118.15 | 1.44349 | 0.00758701 |  |
| A0A075B6<br>I0 | IGLV8-<br>61 | Protein IGLV8-61 (Fragment)<br>OS=Homo sapiens GN=IGLV8-61<br>PE=1 SV=7                                                                                                                 | 7.37704918  | 1  | 1  | 1  | 122  | 12.806  | 4.55 | 71.1 | 92.6 | 108.6 | 127.7 | 81.85 | 118.15 | 1.44349 | 0.00758701 |  |

|        |        |                                                                                                                                 |             |    |    |   |     |        |      |      |      |       |       |       |        |         |            |
|--------|--------|---------------------------------------------------------------------------------------------------------------------------------|-------------|----|----|---|-----|--------|------|------|------|-------|-------|-------|--------|---------|------------|
| P02753 | RBP4   | Retinol-binding protein 4<br>OS=Homo sapiens GN=RBP4<br>PE=1 SV=3                                                               | 8.457711443 | 2  | 3  | 2 | 201 | 22.995 | 6.07 | 89.3 | 74.6 | 99.1  | 137   | 81.95 | 118.05 | 1.44051 | 0.00795041 |
| A2VCK8 | TMSB4X | Thymosin beta 4, X-linked<br>OS=Homo sapiens GN=TMSB4X<br>PE=2 SV=1                                                             | 75          | 5  | 11 | 5 | 44  | 5.05   | 5.06 | 66.2 | 97.7 | 130.5 | 105.6 | 81.95 | 118.05 | 1.44051 | 0.00795041 |
| Q6QNY5 | GNE    | UDP-N-acetylglucosamine-2-<br>epimerase / N-acetylmannosamine<br>kinase OS=Homo sapiens<br>GN=GNE PE=2 SV=1                     | 12.46537396 | 8  | 10 | 8 | 722 | 79.323 | 6.86 | 86.5 | 77.6 | 126.7 | 109.3 | 82.05 | 118    | 1.43815 | 0.00825024 |
| P60891 | PRPS1  | Ribose-phosphate<br>pyrophosphokinase 1 OS=Homo<br>sapiens GN=PRPS1 PE=1 SV=2                                                   | 39.3081761  | 10 | 18 | 5 | 318 | 34.812 | 6.98 | 86.7 | 77.7 | 120.2 | 115.4 | 82.2  | 117.8  | 1.43309 | 0.00892736 |
| J3QLD6 | UTP18  | U3 small nucleolar RNA-<br>associated protein 18 homolog<br>(Fragment) OS=Homo sapiens<br>GN=UTP18 PE=1 SV=1                    | 22.60869565 | 2  | 3  | 1 | 115 | 12.665 | 9.04 | 87.4 | 77   | 128.2 | 107.4 | 82.2  | 117.8  | 1.43309 | 0.00892736 |
| Q59GB4 |        | Dihydropyrimidinase-like 2 variant<br>(Fragment) OS=Homo sapiens<br>PE=2 SV=1                                                   | 28.82165605 | 13 | 21 | 4 | 628 | 68.142 | 6.24 | 81.7 | 82.8 | 118.8 | 116.6 | 82.25 | 117.7  | 1.431   | 0.00922169 |
| A8K2T4 |        | cDNA FLJ78207, highly similar to<br>Human complement protein<br>component C7 mRNA OS=Homo<br>sapiens PE=2 SV=1                  | 2.016607355 | 2  | 2  | 2 | 843 | 93.346 | 6.51 | 68   | 96.6 | 94.7  | 140.7 | 82.3  | 117.7  | 1.43013 | 0.00934696 |
| B2RCY7 |        | cDNA, FLJ96375, highly similar to<br>Homo sapiens interleukin 1<br>receptor-like 2 (IL1RL2), mRNA<br>OS=Homo sapiens PE=2 SV=1  | 1.217391304 | 1  | 1  | 1 | 575 | 65.348 | 7.46 | 90.4 | 74.3 | 125.2 | 110.1 | 82.35 | 117.65 | 1.42866 | 0.00956325 |
| B4DUP2 |        | cDNA FLJ56155, highly similar to<br>UTP--glucose-1-phosphate<br>uridylyltransferase 2 (EC 2.7.7.9)<br>OS=Homo sapiens PE=2 SV=1 | 35.20309478 | 14 | 19 | 1 | 517 | 57.755 | 8.13 | 81   | 83.8 | 120.6 | 114.5 | 82.4  | 117.55 | 1.42658 | 0.00987616 |

|        |             |                                                                                                                                                                |             |    |    |    |     |         |      |      |       |       |       |       |        |         |           |
|--------|-------------|----------------------------------------------------------------------------------------------------------------------------------------------------------------|-------------|----|----|----|-----|---------|------|------|-------|-------|-------|-------|--------|---------|-----------|
| A8KAJ3 |             | cDNA FLJ77823, highly similar to Homo sapiens EGF-containing fibulin-like extracellular matrix protein 1, transcript variant 3, mRNA OS=Homo sapiens PE=2 SV=1 | 4.868154158 | 2  | 2  | 2  | 493 | 54.632  | 5.14 | 79.7 | 85.3  | 114.7 | 120.3 | 82.5  | 117.5  | 1.42424 | 0.0102388 |
| D6R968 | N4BP2L<br>2 | NEDD4-binding protein 2-like 2 (Fragment) OS=Homo sapiens GN=N4BP2L2 PE=1 SV=1                                                                                 | 1.692524683 | 1  | 1  | 1  | 709 | 82.316  | 6.38 | 81.6 | 83.5  | 115.6 | 119.3 | 82.55 | 117.45 | 1.42277 | 0.0104732 |
| B7Z3K9 |             | Fructose-bisphosphate aldolase OS=Homo sapiens PE=2 SV=1                                                                                                       | 31.92904656 | 13 | 62 | 7  | 451 | 48.378  | 8.07 | 84.5 | 80.6  | 126.3 | 108.6 | 82.55 | 117.45 | 1.42277 | 0.0104732 |
| P51784 | USP11       | Ubiquitin carboxyl-terminal hydrolase 11 OS=Homo sapiens GN=USP11 PE=1 SV=3                                                                                    | 2.076843198 | 2  | 2  | 2  | 963 | 109.747 | 5.45 | 82.6 | 82.6  | 112.7 | 122.2 | 82.6  | 117.45 | 1.42191 | 0.010613  |
| H3BNH8 |             | Uncharacterized protein (Fragment) OS=Homo sapiens PE=4 SV=2                                                                                                   | 12.76595745 | 1  | 1  | 1  | 94  | 10.371  | 9.29 | 63.1 | 102.1 | 99.3  | 135.6 | 82.6  | 117.45 | 1.42191 | 0.010613  |
| Q5VT79 | ANXA8L<br>1 | Annexin A8-like protein 1 OS=Homo sapiens GN=ANXA8L1 PE=2 SV=2                                                                                                 | 16.20795107 | 5  | 6  | 5  | 327 | 36.856  | 5.78 | 83.8 | 81.5  | 122.7 | 112   | 82.65 | 117.35 | 1.41984 | 0.0109562 |
| F8W809 | TXNRD1      | Thioredoxin reductase 1, cytoplasmic OS=Homo sapiens GN=TXNRD1 PE=1 SV=1                                                                                       | 28.71485944 | 11 | 15 | 10 | 498 | 54.569  | 6.47 | 82.1 | 83.2  | 119.8 | 114.9 | 82.65 | 117.35 | 1.41984 | 0.0109562 |
| P01611 |             | Ig kappa chain V-I region Wes OS=Homo sapiens PE=1 SV=1                                                                                                        | 16.66666667 | 1  | 1  | 1  | 108 | 11.601  | 7.28 | 91.7 | 73.6  | 123.9 | 110.8 | 82.65 | 117.35 | 1.41984 | 0.0109562 |
| P61457 | PCBD1       | Pterin-4-alpha-carbinolamine dehydratase OS=Homo sapiens GN=PCBD1 PE=1 SV=2                                                                                    | 16.34615385 | 2  | 2  | 2  | 104 | 11.992  | 6.8  | 86.6 | 78.8  | 125.5 | 109.2 | 82.7  | 117.35 | 1.41898 | 0.0111015 |
| B4DHZ6 | TF          | Transferrin, isoform CRA_c OS=Homo sapiens GN=TF PE=2 SV=1                                                                                                     | 1.650943396 | 1  | 1  | 1  | 424 | 47.357  | 7.05 | 83.3 | 82.1  | 107.7 | 126.9 | 82.7  | 117.3  | 1.41838 | 0.0112049 |
| Q7Z624 | CAMKM<br>T  | Calmodulin-lysine N-methyltransferase OS=Homo                                                                                                                  | 2.476780186 | 1  | 1  | 1  | 323 | 36.105  | 6.83 | 80.8 | 84.8  | 114.9 | 119.5 | 82.8  | 117.2  | 1.41546 | 0.0117174 |

|                |                |                                                                                                                                                    |             |    |    |    |      |         |       |      |      |       |       |       |        |         |           |
|----------------|----------------|----------------------------------------------------------------------------------------------------------------------------------------------------|-------------|----|----|----|------|---------|-------|------|------|-------|-------|-------|--------|---------|-----------|
|                |                | sapiens GN=CAMKMT PE=1<br>SV=2                                                                                                                     |             |    |    |    |      |         |       |      |      |       |       |       |        |         |           |
| B3KM43         |                | cDNA FLJ10228 fis, clone<br>HEMBB1000119, highly similar to<br>N-acetylserotonin O-<br>methyltransferase-like protein<br>OS=Homo sapiens PE=2 SV=1 | 6.280193237 | 3  | 3  | 1  | 621  | 68.754  | 6.13  | 75.4 | 90.2 | 110.3 | 124.1 | 82.8  | 117.2  | 1.41546 | 0.0117174 |
| P01031         | C5             | Complement C5 OS=Homo<br>sapiens GN=C5 PE=1 SV=4                                                                                                   | 3.341288783 | 6  | 6  | 6  | 1676 | 188.186 | 6.52  | 74.3 | 91.3 | 98    | 136.4 | 82.8  | 117.2  | 1.41546 | 0.0117174 |
| Q6QNK2         | ADGRD<br>1     | Adhesion G-protein coupled<br>receptor D1 OS=Homo sapiens<br>GN=ADGRD1 PE=1 SV=1                                                                   | 3.318077803 | 1  | 3  | 1  | 874  | 96.468  | 7.88  | 71.6 | 94   | 89.4  | 145   | 82.8  | 117.2  | 1.41546 | 0.0117174 |
| B2R7F8         |                | Plasminogen OS=Homo sapiens<br>PE=2 SV=1                                                                                                           | 3.827160494 | 3  | 4  | 1  | 810  | 90.48   | 7.24  | 80.9 | 84.8 | 100.3 | 133.9 | 82.85 | 117.1  | 1.4134  | 0.0120922 |
| Q14781         | CBX2           | Chromobox protein homolog 2<br>OS=Homo sapiens GN=CBX2<br>PE=1 SV=2                                                                                | 1.879699248 | 1  | 1  | 1  | 532  | 56.046  | 10.01 | 81.9 | 84.1 | 125.5 | 108.5 | 83    | 117    | 1.40964 | 0.0128045 |
| A0A090N7<br>T9 | SCRN1          | Secernin 1 OS=Homo sapiens<br>GN=SCRN1 PE=4 SV=1                                                                                                   | 8.212560386 | 3  | 3  | 3  | 414  | 46.353  | 4.75  | 88.4 | 77.7 | 120   | 114   | 83.05 | 117    | 1.40879 | 0.0129707 |
| H6VRG1         | KRT1           | Keratin 1 OS=Homo sapiens<br>GN=KRT1 PE=3 SV=1                                                                                                     | 31.1627907  | 22 | 76 | 15 | 645  | 66.086  | 8.12  | 79   | 87.1 | 136.4 | 97.6  | 83.05 | 117    | 1.40879 | 0.0129707 |
| P00492         | HPRT1          | Hypoxanthine-guanine<br>phosphoribosyltransferase<br>OS=Homo sapiens GN=HPRT1<br>PE=1 SV=2                                                         | 43.57798165 | 8  | 10 | 8  | 218  | 24.564  | 6.68  | 83.1 | 83   | 123.2 | 110.6 | 83.05 | 116.9  | 1.40759 | 0.0132098 |
| Q9NZQ0         | DNAJC2<br>7    | DnaJ homolog subfamily C<br>member 27 OS=Homo sapiens<br>GN=DNAJC27 PE=1 SV=1                                                                      | 4.029304029 | 1  | 1  | 1  | 273  | 30.836  | 8.46  | 82.2 | 84.1 | 122.7 | 111.1 | 83.15 | 116.9  | 1.40589 | 0.013553  |
| Q15819         | UBE2V2         | Ubiquitin-conjugating enzyme E2<br>variant 2 OS=Homo sapiens<br>GN=UBE2V2 PE=1 SV=4                                                                | 22.75862069 | 3  | 4  | 3  | 145  | 16.352  | 8.09  | 77.8 | 88.6 | 122.5 | 111.1 | 83.2  | 116.8  | 1.40385 | 0.0139791 |
| A0A0K0K<br>1L8 | HEL-S-<br>129m | Epididymis secretory sperm<br>binding protein Li 129m OS=Homo                                                                                      | 31.3253012  | 9  | 13 | 9  | 249  | 28.705  | 6.02  | 89.3 | 77.1 | 125.3 | 108.2 | 83.2  | 116.75 | 1.40325 | 0.0141065 |

|        |             |                                                                                                                                       |             |   |    |   |      |         |      |       |      |       |       |       |        |         |           |  |
|--------|-------------|---------------------------------------------------------------------------------------------------------------------------------------|-------------|---|----|---|------|---------|------|-------|------|-------|-------|-------|--------|---------|-----------|--|
|        |             | sapiens GN=HEL-S-129m PE=2<br>SV=1                                                                                                    |             |   |    |   |      |         |      |       |      |       |       |       |        |         |           |  |
| H0YBS2 | SLC36A<br>1 | Proton-coupled amino acid<br>transporter 1 (Fragment)<br>OS=Homo sapiens GN=SLC36A1<br>PE=4 SV=1                                      | 11.23595506 | 1 | 1  | 1 | 89   | 9.739   | 8.28 | 120.7 | 45.8 | 137.3 | 96.3  | 83.25 | 116.8  | 1.403   | 0.0141582 |  |
| Q14997 | PSME4       | Proteasome activator complex<br>subunit 4 OS=Homo sapiens<br>GN=PSME4 PE=1 SV=2                                                       | 3.309820944 | 5 | 5  | 5 | 1843 | 211.199 | 6.9  | 86    | 80.5 | 125.9 | 107.6 | 83.25 | 116.75 | 1.4024  | 0.0142871 |  |
| Q96DC9 | OTUB2       | Ubiquitin thioesterase OTUB2<br>OS=Homo sapiens GN=OTUB2<br>PE=1 SV=2                                                                 | 2.991452991 | 1 | 2  | 1 | 234  | 27.196  | 6.23 | 94.6  | 72   | 132.5 | 100.9 | 83.3  | 116.7  | 1.40096 | 0.014601  |  |
| Q9UJ70 | NAGK        | N-acetyl-D-glucosamine kinase<br>OS=Homo sapiens GN=NAGK<br>PE=1 SV=4                                                                 | 9.593023256 | 2 | 2  | 2 | 344  | 37.352  | 6.24 | 87.9  | 78.7 | 123.9 | 109.5 | 83.3  | 116.7  | 1.40096 | 0.014601  |  |
| B2R983 |             | cDNA, FLJ94267, highly similar to<br>Homo sapiens glutathione S-<br>transferase omega 1 (GSTO1),<br>mRNA OS=Homo sapiens PE=2<br>SV=1 | 17.42738589 | 5 | 6  | 5 | 241  | 27.521  | 6.6  | 90.2  | 76.5 | 124.2 | 109.1 | 83.35 | 116.65 | 1.39952 | 0.0149209 |  |
| A8K6K2 |             | cDNA FLJ75877, highly similar to<br>Homo sapiens 5'-nucleotidase,<br>cytosolic II (NT5C2), mRNA<br>OS=Homo sapiens PE=2 SV=1          | 3.386809269 | 2 | 3  | 2 | 561  | 64.918  | 6.14 | 88.4  | 78.4 | 122.9 | 110.3 | 83.4  | 116.6  | 1.39808 | 0.0152468 |  |
| E7ER45 | MGAM        | Maltase-glucoamylase, intestinal<br>OS=Homo sapiens GN=MGAM<br>PE=1 SV=2                                                              | 1.452960407 | 3 | 3  | 3 | 2753 | 311.825 | 5.41 | 87.2  | 79.8 | 106.7 | 126.4 | 83.5  | 116.55 | 1.39581 | 0.0157755 |  |
| P30520 | ADSS        | Adenylosuccinate synthetase<br>isozyme 2 OS=Homo sapiens<br>GN=ADSS PE=1 SV=3                                                         | 27.85087719 | 9 | 13 | 9 | 456  | 50.066  | 6.55 | 84.3  | 82.7 | 117.6 | 115.4 | 83.5  | 116.5  | 1.39521 | 0.0159175 |  |
| P34949 | MPI         | Mannose-6-phosphate isomerase<br>OS=Homo sapiens GN=MPI PE=1<br>SV=2                                                                  | 3.546099291 | 1 | 1  | 1 | 423  | 46.626  | 5.95 | 81.9  | 85.1 | 129.3 | 103.7 | 83.5  | 116.5  | 1.39521 | 0.0159175 |  |

|        |        |                                                                                                                              |             |    |    |    |      |         |      |      |      |       |       |       |        |         |           |
|--------|--------|------------------------------------------------------------------------------------------------------------------------------|-------------|----|----|----|------|---------|------|------|------|-------|-------|-------|--------|---------|-----------|
| Q9UNR6 | ERG1   | Squalene epoxidase OS=Homo sapiens GN=ERG1 PE=2 SV=1                                                                         | 30.83623693 | 13 | 22 | 13 | 574  | 63.882  | 8.63 | 84.9 | 82.2 | 114.1 | 118.9 | 83.55 | 116.5  | 1.39437 | 0.0161176 |
| Q16853 | AOC3   | Membrane primary amine oxidase OS=Homo sapiens GN=AOC3 PE=1 SV=3                                                             | 1.179554391 | 1  | 2  | 1  | 763  | 84.568  | 6.52 | 73.6 | 93.6 | 97.2  | 135.5 | 83.6  | 116.35 | 1.39175 | 0.0167627 |
| P23381 | WARS   | Tryptophan--tRNA ligase, cytoplasmic OS=Homo sapiens GN=WARS PE=1 SV=2                                                       | 32.69639066 | 11 | 17 | 11 | 471  | 53.132  | 6.23 | 82.9 | 84.4 | 113.4 | 119.3 | 83.65 | 116.35 | 1.39091 | 0.0169717 |
| Q9H2J4 | PDCL3  | Phosducin-like protein 3 OS=Homo sapiens GN=PDCL3 PE=1 SV=1                                                                  | 16.31799163 | 3  | 3  | 3  | 239  | 27.597  | 4.84 | 82.6 | 84.7 | 111.1 | 121.6 | 83.65 | 116.35 | 1.39091 | 0.0169717 |
| O60271 | SPAG9  | C-Jun-amino-terminal kinase-interacting protein 4 OS=Homo sapiens GN=SPAG9 PE=1 SV=4                                         | 2.119606359 | 3  | 3  | 3  | 1321 | 146.115 | 5.15 | 78.1 | 89.2 | 114.4 | 118.3 | 83.65 | 116.35 | 1.39091 | 0.0169717 |
| Q5VXV3 | SET    | SET OS=Homo sapiens GN=SET PE=2 SV=1                                                                                         | 34.13793103 | 8  | 24 | 8  | 290  | 33.469  | 4.32 | 91.6 | 75.8 | 126.4 | 106.2 | 83.7  | 116.3  | 1.38949 | 0.0173364 |
| A8K103 |        | cDNA FLJ75454, highly similar to Homo sapiens arrestin, beta 1 (ARRB1), transcript variant 1, mRNA OS=Homo sapiens PE=2 SV=1 | 2.392344498 | 1  | 1  | 1  | 418  | 47.035  | 6.48 | 85.2 | 82.2 | 124.2 | 108.4 | 83.7  | 116.3  | 1.38949 | 0.0173364 |
| Q96Q89 | KIF20B | Kinesin-like protein KIF20B OS=Homo sapiens GN=KIF20B PE=1 SV=3                                                              | 0.934065934 | 2  | 2  | 2  | 1820 | 210.5   | 5.67 | 88.2 | 79.3 | 123.7 | 108.8 | 83.75 | 116.25 | 1.38806 | 0.0177078 |
| P16930 | FAH    | Fumarylacetoacetase OS=Homo sapiens GN=FAH PE=1 SV=2                                                                         | 2.14797136  | 1  | 1  | 1  | 419  | 46.344  | 6.95 | 79.8 | 87.7 | 127.3 | 105.1 | 83.75 | 116.2  | 1.38746 | 0.0178654 |
| B1AKK2 | DDAH1  | Dimethylarginine dimethylaminohydrolase 1, isoform CRA_b OS=Homo sapiens GN=DDAH1 PE=2 SV=1                                  | 12.98245614 | 2  | 2  | 2  | 285  | 31.102  | 5.81 | 88.3 | 79.3 | 111.8 | 120.6 | 83.8  | 116.2  | 1.38663 | 0.0180862 |
| Q9BRP1 | PDCD2L | Programmed cell death protein 2-like OS=Homo sapiens GN=PDCD2L PE=1 SV=1                                                     | 5.586592179 | 1  | 2  | 1  | 358  | 39.391  | 4.86 | 85.6 | 82.1 | 115.2 | 117.1 | 83.85 | 116.15 | 1.38521 | 0.0184715 |

|        |                |                                                                                                    |             |   |    |   |     |         |      |       |      |       |       |       |        |         |           |
|--------|----------------|----------------------------------------------------------------------------------------------------|-------------|---|----|---|-----|---------|------|-------|------|-------|-------|-------|--------|---------|-----------|
| B7ZKJ8 | ITIH4          | ITIH4 protein OS=Homo sapiens<br>GN=ITIH4 PE=1 SV=1                                                | 3.101604278 | 3 | 13 | 3 | 935 | 103.816 | 6.89 | 75.2  | 92.5 | 102.6 | 129.7 | 83.85 | 116.15 | 1.38521 | 0.0184715 |
| P31150 | GDI1           | Rab GDP dissociation inhibitor<br>alpha OS=Homo sapiens<br>GN=GDI1 PE=1 SV=2                       | 20.80536913 | 8 | 12 | 4 | 447 | 50.55   | 5.14 | 84.4  | 83.3 | 122.5 | 109.7 | 83.85 | 116.1  | 1.38462 | 0.0186352 |
| Q15555 | MAPRE2         | Microtubule-associated protein<br>RP/EB family member 2<br>OS=Homo sapiens GN=MAPRE2<br>PE=1 SV=1  | 4.892966361 | 2 | 2  | 1 | 327 | 37.008  | 5.57 | 82.5  | 85.3 | 118   | 114.2 | 83.9  | 116.1  | 1.38379 | 0.0188639 |
| Q6N097 | DKFZp686H20196 | Putative uncharacterized protein<br>DKFZp686H20196 OS=Homo sapiens<br>GN=DKFZp686H20196 PE=2 SV=1  | 7.484407484 | 2 | 2  | 2 | 481 | 52.725  | 8.48 | 103.2 | 64.6 | 109.1 | 123   | 83.9  | 116.05 | 1.38319 | 0.0190307 |
| Q9NQ92 | COPRS          | Coordinator of PRMT5 and differentiation stimulator OS=Homo sapiens<br>GN=COPRS PE=1 SV=3          | 6.52173913  | 1 | 1  | 1 | 184 | 20.054  | 4.18 | 78.9  | 89   | 115.5 | 116.6 | 83.95 | 116.05 | 1.38237 | 0.0192636 |
| Q96GG9 | DCUN1D1        | DCN1-like protein 1 OS=Homo sapiens<br>GN=DCUN1D1 PE=1 SV=1                                        | 21.23552124 | 4 | 4  | 4 | 259 | 30.105  | 5.34 | 85.5  | 82.6 | 123.1 | 108.8 | 84.05 | 115.95 | 1.37954 | 0.0200849 |
| O00193 | SMAP           | Small acidic protein OS=Homo sapiens<br>GN=SMAP PE=1 SV=1                                          | 25.68306011 | 4 | 10 | 4 | 183 | 20.32   | 4.72 | 86.5  | 81.7 | 122.1 | 109.7 | 84.1  | 115.9  | 1.37812 | 0.0205068 |
| P12429 | ANXA3          | Annexin A3 OS=Homo sapiens<br>GN=ANXA3 PE=1 SV=3                                                   | 29.41176471 | 9 | 10 | 9 | 323 | 36.353  | 5.92 | 86.3  | 81.9 | 120.7 | 111.1 | 84.1  | 115.9  | 1.37812 | 0.0205068 |
| O95817 | BAG3           | BAG family molecular chaperone regulator 3 OS=Homo sapiens<br>GN=BAG3 PE=1 SV=3                    | 19.82608696 | 9 | 13 | 9 | 575 | 61.557  | 6.95 | 82.8  | 85.4 | 117.9 | 113.9 | 84.1  | 115.9  | 1.37812 | 0.0205068 |
| O43708 | GSTZ1          | Maleylacetoacetate isomerase<br>OS=Homo sapiens GN=GSTZ1<br>PE=1 SV=3                              | 3.703703704 | 1 | 1  | 1 | 216 | 24.197  | 8.54 | 88.4  | 79.8 | 122.3 | 109.5 | 84.1  | 115.9  | 1.37812 | 0.0205068 |
| B2R5R5 |                | cDNA, FLJ92583, highly similar to Homo sapiens glycogenin (GYG), mRNA OS=Homo sapiens<br>PE=2 SV=1 | 10.85714286 | 3 | 3  | 3 | 350 | 39.329  | 5.53 | 87.4  | 80.9 | 122.9 | 108.9 | 84.15 | 115.9  | 1.3773  | 0.0207547 |



|                |                 |                                                                                                                          |             |    |    |    |     |        |      |      |      |       |       |       |        |         |           |
|----------------|-----------------|--------------------------------------------------------------------------------------------------------------------------|-------------|----|----|----|-----|--------|------|------|------|-------|-------|-------|--------|---------|-----------|
| B2RDF5         |                 | cDNA, FLJ96587, highly similar to Homo sapiens SUMO-1 activating enzyme subunit 2 (UBA2), mRNA OS=Homo sapiens PE=2 SV=1 | 22.5        | 11 | 14 | 11 | 640 | 71.135 | 5.29 | 85.7 | 82.6 | 123.7 | 108   | 84.15 | 115.85 | 1.37671 | 0.0209363 |
| B5BUB5         | SSB             | Autoantigen La (Fragment) OS=Homo sapiens GN=SSB PE=2 SV=1                                                               | 30.88235294 | 15 | 22 | 15 | 408 | 46.838 | 7.12 | 89.7 | 78.7 | 127.4 | 104.2 | 84.2  | 115.8  | 1.3753  | 0.0213736 |
| A0A024R2<br>G6 | SH3BP5          | SH3-domain binding protein 5 (BTK-associated), isoform CRA_b OS=Homo sapiens GN=SH3BP5 PE=4 SV=1                         | 4.175824176 | 2  | 2  | 1  | 455 | 50.394 | 4.97 | 78   | 90.5 | 97.6  | 133.9 | 84.25 | 115.75 | 1.37389 | 0.0218187 |
| P53602         | MVD             | Diphosphomevalonate decarboxylase OS=Homo sapiens GN=MVD PE=1 SV=1                                                       | 15          | 5  | 6  | 5  | 400 | 43.377 | 7.23 | 82.3 | 86.2 | 123   | 108.4 | 84.25 | 115.7  | 1.37329 | 0.0220087 |
| S4R435         | RPS10-<br>NUDT3 | Protein RPS10-NUDT3 (Fragment) OS=Homo sapiens GN=RPS10-NUDT3 PE=4 SV=1                                                  | 29.72027972 | 10 | 36 | 1  | 286 | 32.576 | 9.19 | 79   | 89.7 | 118.2 | 113.2 | 84.35 | 115.7  | 1.37167 | 0.0225376 |
| B2RD51         |                 | Proteasome assembly chaperone 1 OS=Homo sapiens PE=2 SV=1                                                                | 11.80555556 | 3  | 3  | 3  | 288 | 32.861 | 7.17 | 81.4 | 87.3 | 115.1 | 116.2 | 84.35 | 115.65 | 1.37107 | 0.022733  |
| Q7Z4G4         | TRMT11          | tRNA (guanine(10)-N2)-methyltransferase homolog OS=Homo sapiens GN=TRMT11 PE=1 SV=1                                      | 2.591792657 | 1  | 2  | 1  | 463 | 53.387 | 7.78 | 85.3 | 83.5 | 121   | 110.2 | 84.4  | 115.6  | 1.36967 | 0.0232024 |
| Q9H237         | PORCN           | Protein-serine O-palmitoleoyltransferase porcupine OS=Homo sapiens GN=PORCN PE=1 SV=2                                    | 2.169197397 | 1  | 1  | 1  | 461 | 52.283 | 8.84 | 79.5 | 89.3 | 114.3 | 116.9 | 84.4  | 115.6  | 1.36967 | 0.0232024 |
| Q99471         | PFDN5           | Prefoldin subunit 5 OS=Homo sapiens GN=PFDN5 PE=1 SV=2                                                                   | 40.90909091 | 5  | 8  | 5  | 154 | 17.317 | 6.33 | 84.8 | 84   | 120.6 | 110.5 | 84.4  | 115.55 | 1.36908 | 0.0234031 |
| Q6PD74         | AAGAB           | Alpha- and gamma-adaptin-binding protein p34 OS=Homo sapiens GN=AAGAB PE=1 SV=1                                          | 4.444444444 | 1  | 2  | 1  | 315 | 34.572 | 4.64 | 87   | 81.9 | 119.1 | 112   | 84.45 | 115.55 | 1.36827 | 0.0236801 |

|            |          |                                                                                        |             |    |     |    |      |         |      |      |      |       |       |       |        |         |           |
|------------|----------|----------------------------------------------------------------------------------------|-------------|----|-----|----|------|---------|------|------|------|-------|-------|-------|--------|---------|-----------|
| P26038     | MSN      | Moesin OS=Homo sapiens<br>GN=MSN PE=1 SV=3                                             | 53.55285962 | 40 | 93  | 26 | 577  | 67.778  | 6.4  | 83   | 85.9 | 113.5 | 117.6 | 84.45 | 115.55 | 1.36827 | 0.0236801 |
| Q6ZS27     | ZNF662   | Zinc finger protein 662 OS=Homo sapiens<br>GN=ZNF662 PE=1 SV=1                         | 4.225352113 | 2  | 2   | 1  | 426  | 48.465  | 7.66 | 87   | 82.1 | 120   | 110.9 | 84.55 | 115.45 | 1.36546 | 0.024661  |
| V9HWB8     | HEL-S-30 | Pyruvate kinase OS=Homo sapiens<br>GN=HEL-S-30 PE=1 SV=1                               | 74.38794727 | 33 | 150 | 33 | 531  | 57.9    | 7.84 | 84.9 | 84.2 | 119.2 | 111.7 | 84.55 | 115.45 | 1.36546 | 0.024661  |
| Q9H6T0     | ESRP2    | Epithelial splicing regulatory protein 2 OS=Homo sapiens<br>GN=ESRP2 PE=1 SV=1         | 1.5130674   | 1  | 1   | 1  | 727  | 78.351  | 6.71 | 79.5 | 89.6 | 102.7 | 128.2 | 84.55 | 115.45 | 1.36546 | 0.024661  |
| O00622     | CYR61    | Protein CYR61 OS=Homo sapiens<br>GN=CYR61 PE=1 SV=1                                    | 52.49343832 | 15 | 25  | 15 | 381  | 41.998  | 8.21 | 78.8 | 90.3 | 110.1 | 120.8 | 84.55 | 115.45 | 1.36546 | 0.024661  |
| Q9Y2I7     | PIKFYVE  | 1-phosphatidylinositol 3-phosphate 5-kinase OS=Homo sapiens<br>GN=PIKFYVE PE=1 SV=3    | 0.333651096 | 1  | 1   | 1  | 2098 | 236.986 | 6.7  | 87.4 | 81.8 | 125.8 | 105   | 84.6  | 115.4  | 1.36407 | 0.0251643 |
| Q96N23     | CFAP54   | Cilia- and flagella-associated protein 54 OS=Homo sapiens<br>GN=CFAP54 PE=2 SV=3       | 0.226098191 | 1  | 1   | 1  | 3096 | 351.744 | 8.1  | 79.5 | 89.7 | 89.7  | 141   | 84.6  | 115.35 | 1.36348 | 0.0253799 |
| Q93100     | PHKB     | Phosphorylase b kinase regulatory subunit beta OS=Homo sapiens<br>GN=PHKB PE=1 SV=3    | 0.914913083 | 1  | 1   | 1  | 1093 | 124.805 | 6.95 | 85.8 | 83.5 | 122.9 | 107.8 | 84.65 | 115.35 | 1.36267 | 0.0256765 |
| A0A024R0R4 | SAE1     | SUMO-1 activating enzyme subunit 1, isoform CRA_b OS=Homo sapiens<br>GN=SAE1 PE=4 SV=1 | 28.03468208 | 8  | 11  | 8  | 346  | 38.426  | 5.3  | 83.2 | 86.1 | 124.9 | 105.8 | 84.65 | 115.35 | 1.36267 | 0.0256765 |
| Q86UU0     | BCL9L    | B-cell CLL/lymphoma 9-like protein OS=Homo sapiens<br>GN=BCL9L PE=1 SV=1               | 0.667111408 | 1  | 1   | 1  | 1499 | 157.027 | 8.63 | 87   | 82.5 | 118.9 | 111.6 | 84.75 | 115.25 | 1.35988 | 0.0267276 |
| E9PQY2     | PFDN4    | Prefoldin subunit 4 OS=Homo sapiens<br>GN=PFDN4 PE=1 SV=1                              | 8.088235294 | 1  | 1   | 1  | 136  | 15.589  | 4.58 | 85.7 | 83.8 | 118.2 | 112.3 | 84.75 | 115.25 | 1.35988 | 0.0267276 |
| Q05DJ2     | MTAP     | Purine nucleoside phosphorylase OS=Homo sapiens<br>GN=MTAP PE=2 SV=1                   | 25.61983471 | 5  | 7   | 5  | 242  | 26.773  | 6.84 | 84.8 | 84.7 | 118.9 | 111.6 | 84.75 | 115.25 | 1.35988 | 0.0267276 |

|            |        |                                                                                                |             |    |    |    |      |         |      |      |       |       |       |       |        |         |           |
|------------|--------|------------------------------------------------------------------------------------------------|-------------|----|----|----|------|---------|------|------|-------|-------|-------|-------|--------|---------|-----------|
| Q9NS93     | TM7SF3 | Transmembrane 7 superfamily member 3 OS=Homo sapiens GN=TM7SF3 PE=2 SV=1                       | 1.578947368 | 1  | 1  | 1  | 570  | 64.125  | 7.01 | 73.5 | 96    | 125.2 | 105.3 | 84.75 | 115.25 | 1.35988 | 0.0267276 |
| D3DSY9     | FNTA   | Farnesyltransferase, CAAX box, alpha, isoform CRA_a OS=Homo sapiens GN=FNTA PE=4 SV=1          | 2.188183807 | 1  | 1  | 1  | 457  | 52.577  | 5.57 | 87   | 82.5  | 123.9 | 106.5 | 84.75 | 115.2  | 1.35929 | 0.026955  |
| P36871     | PGM1   | Phosphoglucomutase-1 OS=Homo sapiens GN=PGM1 PE=1 SV=3                                         | 38.25622776 | 18 | 21 | 18 | 562  | 61.411  | 6.76 | 87   | 82.6  | 121.8 | 108.6 | 84.8  | 115.2  | 1.35849 | 0.0272668 |
| A0A0A0MQR1 | MAP4K5 | Mitogen-activated protein kinase kinase kinase OS=Homo sapiens GN=MAP4K5 PE=1 SV=1             | 1.063829787 | 1  | 1  | 1  | 846  | 94.963  | 7.83 | 84.5 | 85.1  | 114.3 | 116.1 | 84.8  | 115.2  | 1.35849 | 0.0272668 |
| O75663     | TIPRL  | TIP41-like protein OS=Homo sapiens GN=TIPRL PE=1 SV=2                                          | 4.411764706 | 1  | 1  | 1  | 272  | 31.424  | 5.91 | 82.7 | 86.9  | 118.9 | 111.4 | 84.8  | 115.15 | 1.3579  | 0.0274983 |
| Q8IZP9     | ADGRG2 | Adhesion G-protein coupled receptor G2 OS=Homo sapiens GN=ADGRG2 PE=1 SV=2                     | 3.638151426 | 3  | 3  | 3  | 1017 | 111.521 | 7.55 | 89   | 80.7  | 107.9 | 122.4 | 84.85 | 115.15 | 1.3571  | 0.0278154 |
| P63104     | YWHAZ  | 14-3-3 protein zeta/delta OS=Homo sapiens GN=YWHAZ PE=1 SV=1                                   | 67.34693878 | 16 | 56 | 11 | 245  | 27.728  | 4.79 | 86.8 | 82.9  | 122.4 | 107.9 | 84.85 | 115.15 | 1.3571  | 0.0278154 |
| A0A140VK83 | PPP1R7 | Protein phosphatase 1, regulatory subunit 7, isoform CRA_b OS=Homo sapiens GN=PPP1R7 PE=2 SV=1 | 10.27777778 | 4  | 4  | 4  | 360  | 41.539  | 4.91 | 89.6 | 80.2  | 118.3 | 111.9 | 84.9  | 115.1  | 1.35571 | 0.0283733 |
| Q96AY4     | TTC28  | Tetratricopeptide repeat protein 28 OS=Homo sapiens GN=TTC28 PE=1 SV=4                         | 1.088270859 | 2  | 2  | 2  | 2481 | 270.715 | 6.89 | 75.1 | 94.7  | 96.4  | 133.7 | 84.9  | 115.05 | 1.35512 | 0.0286131 |
| A0A0A6Y92  | ADSL   | Adenylosuccinate lyase OS=Homo sapiens GN=ADSL PE=1 SV=1                                       | 13.65461847 | 4  | 4  | 4  | 498  | 56.181  | 7.43 | 84.1 | 85.8  | 115.5 | 114.6 | 84.95 | 115.05 | 1.35433 | 0.0289407 |
| B2R577     |        | Protein S100 OS=Homo sapiens PE=2 SV=1                                                         | 17.77777778 | 2  | 5  | 2  | 90   | 10.101  | 5.91 | 87.4 | 82.9  | 119.9 | 109.9 | 85.15 | 114.9  | 1.34938 | 0.0310488 |
| A0A0K2BMD8 | HBA2   | Mutant hemoglobin alpha 2 globin chain OS=Homo sapiens GN=HBA2 PE=3 SV=1                       | 34.50704225 | 5  | 27 | 5  | 142  | 15.248  | 8.68 | 66.7 | 103.7 | 93.3  | 136.3 | 85.2  | 114.8  | 1.34742 | 0.0319253 |

|                |              |                                                                                   |             |    |     |    |      |         |      |      |      |       |       |       |        |         |           |
|----------------|--------------|-----------------------------------------------------------------------------------|-------------|----|-----|----|------|---------|------|------|------|-------|-------|-------|--------|---------|-----------|
| P00558         | PGK1         | Phosphoglycerate kinase 1<br>OS=Homo sapiens GN=PGK1<br>PE=1 SV=3                 | 61.15107914 | 25 | 76  | 25 | 417  | 44.586  | 8.1  | 88.3 | 82.3 | 121.1 | 108.3 | 85.3  | 114.7  | 1.34467 | 0.0331903 |
| A0A140VJ<br>J2 | ESD          | S-formylglutathione hydrolase<br>OS=Homo sapiens GN=ESD PE=2<br>SV=1              | 16.31205674 | 4  | 6   | 4  | 282  | 31.442  | 7.02 | 89   | 81.6 | 124.3 | 105   | 85.3  | 114.65 | 1.34408 | 0.0334655 |
| Q43491         | EPB41L<br>2  | Band 4.1-like protein 2 OS=Homo<br>sapiens GN=EPB41L2 PE=1 SV=1                   | 13.53233831 | 11 | 12  | 10 | 1005 | 112.519 | 5.44 | 83.7 | 87   | 108.5 | 120.8 | 85.35 | 114.65 | 1.34329 | 0.0338386 |
| A0A140VJ<br>P2 |              | Testicular tissue protein Li 118<br>OS=Homo sapiens PE=2 SV=1                     | 26.64670659 | 7  | 7   | 7  | 334  | 37.528  | 7.36 | 89.4 | 81.3 | 123   | 106.3 | 85.35 | 114.65 | 1.34329 | 0.0338386 |
| Q8WTS6         | SETD7        | Histone-lysine N-methyltransferase<br>SETD7 OS=Homo sapiens<br>GN=SETD7 PE=1 SV=1 | 6.010928962 | 2  | 2   | 2  | 366  | 40.695  | 4.63 | 79.7 | 91   | 119   | 110.3 | 85.35 | 114.65 | 1.34329 | 0.0338386 |
| P05546         | SERPIN<br>D1 | Heparin cofactor 2 OS=Homo<br>sapiens GN=SERPIND1 PE=1<br>SV=3                    | 2.404809619 | 1  | 3   | 1  | 499  | 57.034  | 6.9  | 78   | 92.7 | 91.7  | 137.6 | 85.35 | 114.65 | 1.34329 | 0.0338386 |
| O75385         | ULK1         | Serine/threonine-protein kinase<br>ULK1 OS=Homo sapiens<br>GN=ULK1 PE=1 SV=2      | 0.666666667 | 1  | 1   | 1  | 1050 | 112.56  | 8.79 | 96.9 | 74.1 | 114.9 | 114.1 | 85.5  | 114.5  | 1.33918 | 0.0358481 |
| Q9UK22         | FBXO2        | F-box only protein 2 OS=Homo<br>sapiens GN=FBXO2 PE=1 SV=2                        | 14.86486486 | 3  | 4   | 3  | 296  | 33.307  | 4.37 | 88.3 | 82.8 | 118.3 | 110.6 | 85.55 | 114.45 | 1.33781 | 0.03654   |
| Q14019         | COTL1        | Coactosin-like protein OS=Homo<br>sapiens GN=COTL1 PE=1 SV=3                      | 28.16901408 | 5  | 5   | 5  | 142  | 15.935  | 5.67 | 82.1 | 89.1 | 119.6 | 109.3 | 85.6  | 114.45 | 1.33703 | 0.0369409 |
| P52888         | THOP1        | Thimet oligopeptidase OS=Homo<br>sapiens GN=THOP1 PE=1 SV=2                       | 9.869375907 | 6  | 7   | 6  | 689  | 78.789  | 6.05 | 84.1 | 87.1 | 115.7 | 113.1 | 85.6  | 114.4  | 1.33645 | 0.0372431 |
| P60174         | TPI1         | Triosephosphate isomerase<br>OS=Homo sapiens GN=TPI1<br>PE=1 SV=3                 | 69.58041958 | 17 | 43  | 17 | 286  | 30.772  | 5.92 | 87.7 | 83.6 | 120.3 | 108.4 | 85.65 | 114.35 | 1.33508 | 0.0379576 |
| P04075         | ALDOA        | Fructose-bisphosphate aldolase A<br>OS=Homo sapiens GN=ALDOA<br>PE=1 SV=2         | 74.72527473 | 26 | 114 | 20 | 364  | 39.395  | 8.09 | 86.8 | 84.5 | 118   | 110.7 | 85.65 | 114.35 | 1.33508 | 0.0379576 |

|                |                  |                                                                                                             |             |    |    |    |      |         |      |      |      |       |       |       |        |         |           |
|----------------|------------------|-------------------------------------------------------------------------------------------------------------|-------------|----|----|----|------|---------|------|------|------|-------|-------|-------|--------|---------|-----------|
| P05161         | ISG15            | Ubiquitin-like protein ISG15<br>OS=Homo sapiens GN=ISG15<br>PE=1 SV=5                                       | 10.90909091 | 2  | 3  | 2  | 165  | 17.876  | 7.44 | 78.8 | 92.5 | 121.2 | 107.5 | 85.65 | 114.35 | 1.33508 | 0.0379576 |
| O95833         | CLIC3            | Chloride intracellular channel<br>protein 3 OS=Homo sapiens<br>GN=CLIC3 PE=1 SV=2                           | 6.779661017 | 2  | 2  | 2  | 236  | 26.632  | 6.43 | 83.8 | 87.6 | 120.3 | 108.3 | 85.7  | 114.3  | 1.33372 | 0.0386837 |
| A0A024R<br>DX3 | ATP7B            | ATPase, Cu++ transporting, beta<br>polypeptide, isoform CRA_c<br>OS=Homo sapiens GN=ATP7B<br>PE=3 SV=1      | 0.4778157   | 1  | 2  | 1  | 1465 | 157.162 | 6.7  | 83.6 | 87.8 | 113.2 | 115.4 | 85.7  | 114.3  | 1.33372 | 0.0386837 |
| Q86T29         | ZNF605           | Zinc finger protein 605 OS=Homo<br>sapiens GN=ZNF605 PE=2 SV=1                                              | 1.092043682 | 1  | 1  | 1  | 641  | 74.328  | 9.11 | 79.7 | 91.8 | 118.8 | 109.7 | 85.75 | 114.25 | 1.33236 | 0.0394213 |
| Q9BV57         | ADI1             | 1,2-dihydroxy-3-keto-5-<br>methylthiopentene dioxygenase<br>OS=Homo sapiens GN=ADI1<br>PE=1 SV=1            | 7.82122905  | 1  | 1  | 1  | 179  | 21.485  | 5.68 | 74   | 97.5 | 113.5 | 114.9 | 85.75 | 114.2  | 1.33178 | 0.0397413 |
| A0A024Q<br>ZT9 | NQO2             | NAD(P)H dehydrogenase, quinone<br>2, isoform CRA_a OS=Homo<br>sapiens GN=NQO2 PE=4 SV=1                     | 24.24242424 | 3  | 4  | 3  | 231  | 25.936  | 6.29 | 89   | 82.6 | 120.5 | 107.9 | 85.8  | 114.2  | 1.331   | 0.0401708 |
| B4DJW8         |                  | cDNA FLJ55697, highly similar to<br>Protein transport protein Sec23B<br>OS=Homo sapiens PE=2 SV=1           | 13.2176235  | 7  | 12 | 6  | 749  | 84.435  | 6.99 | 91.3 | 80.3 | 117   | 111.3 | 85.8  | 114.15 | 1.33042 | 0.040496  |
| Q96TA1         | FAM129<br>B      | Niban-like protein 1 OS=Homo<br>sapiens GN=FAM129B PE=1<br>SV=3                                             | 17.69436997 | 12 | 16 | 12 | 746  | 84.085  | 6.19 | 83.9 | 87.7 | 114.6 | 113.7 | 85.8  | 114.15 | 1.33042 | 0.040496  |
| Q69YJ7         | DKFZp6<br>67H197 | Putative uncharacterized protein<br>DKFZp667H197 (Fragment)<br>OS=Homo sapiens<br>GN=DKFZp667H197 PE=2 SV=1 | 9.853249476 | 8  | 8  | 8  | 954  | 100.097 | 8.91 | 88.9 | 82.8 | 117.6 | 110.8 | 85.85 | 114.2  | 1.33023 | 0.040604  |
| P62942         | FKBP1A           | Peptidyl-prolyl cis-trans isomerase<br>FKBP1A OS=Homo sapiens<br>GN=FKBP1A PE=1 SV=2                        | 25          | 2  | 3  | 2  | 108  | 11.943  | 8.16 | 90.3 | 81.4 | 119.5 | 108.9 | 85.85 | 114.2  | 1.33023 | 0.040604  |

|                |        |                                                                                                                                                                    |             |    |    |    |      |         |      |      |      |       |       |       |        |         |           |
|----------------|--------|--------------------------------------------------------------------------------------------------------------------------------------------------------------------|-------------|----|----|----|------|---------|------|------|------|-------|-------|-------|--------|---------|-----------|
| Q13642         | FHL1   | Four and a half LIM domains protein 1 OS=Homo sapiens GN=FHL1 PE=1 SV=4                                                                                            | 6.811145511 | 2  | 2  | 2  | 323  | 36.239  | 8.97 | 84.4 | 87.3 | 119.2 | 109.1 | 85.85 | 114.15 | 1.32964 | 0.0409322 |
| Q6FHG5         | SNCG   | Gamma-synuclein OS=Homo sapiens GN=SNCG PE=2 SV=1                                                                                                                  | 48.81889764 | 6  | 7  | 6  | 127  | 13.323  | 4.86 | 84.5 | 87.2 | 122.7 | 105.6 | 85.85 | 114.15 | 1.32964 | 0.0409322 |
| Q92990         | GLMN   | Glomulin OS=Homo sapiens GN=GLMN PE=1 SV=2                                                                                                                         | 4.713804714 | 3  | 3  | 3  | 594  | 68.165  | 5.33 | 83.3 | 88.5 | 120.1 | 108.1 | 85.9  | 114.1  | 1.32829 | 0.0417057 |
| B2R9H3         |        | cDNA, FLJ94391, highly similar to Homo sapiens serine (or cysteine) proteinase inhibitor, clade B (ovalbumin), member 8 (SERPINB8), mRNA OS=Homo sapiens PE=2 SV=1 | 4.010695187 | 1  | 1  | 1  | 374  | 42.727  | 5.47 | 92.4 | 79.4 | 117.3 | 110.9 | 85.9  | 114.1  | 1.32829 | 0.0417057 |
| Q03393         | PTS    | 6-pyruvoyl tetrahydrobiopterin synthase OS=Homo sapiens GN=PTS PE=1 SV=1                                                                                           | 15.17241379 | 2  | 2  | 2  | 145  | 16.375  | 6.68 | 85.6 | 86.2 | 120   | 108.1 | 85.9  | 114.05 | 1.32771 | 0.0420417 |
| V9HWK2         | HEL114 | Epididymis luminal protein 114 OS=Homo sapiens GN=HEL114 PE=2 SV=1                                                                                                 | 40.12345679 | 42 | 67 | 42 | 1134 | 123.722 | 5.66 | 86.8 | 85.1 | 117.2 | 110.9 | 85.95 | 114.05 | 1.32693 | 0.0424914 |
| Q59EF6         |        | Calpain 2, large [catalytic] subunit variant (Fragment) OS=Homo sapiens PE=2 SV=1                                                                                  | 16.32373114 | 11 | 12 | 11 | 729  | 83.056  | 5.06 | 84.1 | 87.8 | 118.2 | 109.9 | 85.95 | 114.05 | 1.32693 | 0.0424914 |
| P81605         | DCD    | Dermcidin OS=Homo sapiens GN=DCD PE=1 SV=2                                                                                                                         | 19.09090909 | 2  | 3  | 2  | 110  | 11.277  | 6.54 | 86.3 | 85.6 | 125.7 | 102.4 | 85.95 | 114.05 | 1.32693 | 0.0424914 |
| P50991         | CCT4   | T-complex protein 1 subunit delta OS=Homo sapiens GN=CCT4 PE=1 SV=4                                                                                                | 46.75324675 | 24 | 50 | 23 | 539  | 57.888  | 7.83 | 88.1 | 83.8 | 116.7 | 111.3 | 85.95 | 114    | 1.32635 | 0.0428329 |
| H3BQK9         | MACF1  | Microtubule-actin cross-linking factor 1, isoforms 1/2/3/5 OS=Homo sapiens GN=MACF1 PE=1 SV=1                                                                      | 5.597997893 | 38 | 41 | 1  | 7592 | 860.543 | 5.38 | 91.7 | 80.3 | 118.8 | 109.2 | 86    | 114    | 1.32558 | 0.0432894 |
| A0A140V<br>KG5 | KIF2B  | Kinesin-like protein OS=Homo sapiens GN=KIF2B PE=2 SV=1                                                                                                            | 5.349182764 | 3  | 6  | 1  | 673  | 76.206  | 8.65 | 72.2 | 99.8 | 90.9  | 137.1 | 86    | 114    | 1.32558 | 0.0432894 |

|                |             |                                                                                                                                             |             |    |    |    |     |        |      |      |      |       |       |       |        |         |           |
|----------------|-------------|---------------------------------------------------------------------------------------------------------------------------------------------|-------------|----|----|----|-----|--------|------|------|------|-------|-------|-------|--------|---------|-----------|
| A0A024R<br>DV8 | TSC22D<br>1 | TSC22 domain family, member 1,<br>isoform CRA_a OS=Homo sapiens<br>GN=TSC22D1 PE=4 SV=1                                                     | 25.69444444 | 3  | 3  | 3  | 144 | 15.67  | 5.2  | 80.5 | 91.6 | 115.9 | 112.1 | 86.05 | 114    | 1.32481 | 0.0437499 |
| Q8TCG2         | PI4K2B      | Phosphatidylinositol 4-kinase type<br>2-beta OS=Homo sapiens<br>GN=PI4K2B PE=1 SV=1                                                         | 5.405405405 | 2  | 3  | 2  | 481 | 54.71  | 5.97 | 89.7 | 82.4 | 110.4 | 117.4 | 86.05 | 113.9  | 1.32365 | 0.0444528 |
| B4DLV7         |             | cDNA FLJ60299, highly similar to<br>Rab GDP dissociation inhibitor<br>beta OS=Homo sapiens PE=2<br>SV=1                                     | 38.75278396 | 15 | 28 | 11 | 449 | 51.121 | 8.18 | 84.9 | 87.3 | 114.5 | 113.3 | 86.1  | 113.9  | 1.32288 | 0.0449233 |
| A0A024R6<br>87 | PLEKHC<br>1 | Pleckstrin homology domain<br>containing, family C (With FERM<br>domain) member 1, isoform<br>CRA_b OS=Homo sapiens<br>GN=PLEKHC1 PE=4 SV=1 | 17.20588235 | 11 | 11 | 1  | 680 | 77.811 | 6.7  | 75.8 | 96.4 | 114.2 | 113.6 | 86.1  | 113.9  | 1.32288 | 0.0449233 |
| Q9BYB4         | GNB1L       | Guanine nucleotide-binding protein<br>subunit beta-like protein 1<br>OS=Homo sapiens GN=GNB1L<br>PE=1 SV=2                                  | 7.033639144 | 1  | 1  | 1  | 327 | 35.595 | 7.97 | 83.4 | 88.8 | 115.7 | 112   | 86.1  | 113.85 | 1.3223  | 0.0452818 |
| Q9NQ48         | LZTFL1      | Leucine zipper transcription factor-<br>like protein 1 OS=Homo sapiens<br>GN=LZTFL1 PE=1 SV=1                                               | 13.04347826 | 4  | 4  | 4  | 299 | 34.571 | 5.36 | 83.2 | 89.1 | 115.4 | 112.4 | 86.15 | 113.9  | 1.32211 | 0.0453978 |
| P51157         | RAB28       | Ras-related protein Rab-28<br>OS=Homo sapiens GN=RAB28<br>PE=1 SV=2                                                                         | 4.977375566 | 1  | 1  | 1  | 221 | 24.826 | 5.97 | 88.4 | 83.9 | 118.2 | 109.5 | 86.15 | 113.85 | 1.32153 | 0.0457594 |
| O60890         | OPHN1       | Oligophrenin-1 OS=Homo sapiens<br>GN=OPHN1 PE=1 SV=1                                                                                        | 1.87032419  | 1  | 1  | 1  | 802 | 91.583 | 7.96 | 99.3 | 73   | 130.6 | 97.1  | 86.15 | 113.85 | 1.32153 | 0.0457594 |
| Q9BZD2         | SLC29A<br>3 | Equilibrative nucleoside transporter<br>3 OS=Homo sapiens<br>GN=SLC29A3 PE=1 SV=3                                                           | 1.894736842 | 1  | 1  | 1  | 475 | 51.781 | 7.78 | 89.1 | 83.2 | 122.1 | 105.6 | 86.15 | 113.85 | 1.32153 | 0.0457594 |
| O00625         | PIR         | Pirin OS=Homo sapiens GN=PIR<br>PE=1 SV=1                                                                                                   | 33.10344828 | 7  | 8  | 7  | 290 | 32.093 | 6.92 | 85.7 | 86.7 | 118.8 | 108.8 | 86.2  | 113.8  | 1.32019 | 0.0466084 |

|                |               |                                                                                                                         |             |    |    |    |      |         |      |      |       |       |       |       |        |         |           |
|----------------|---------------|-------------------------------------------------------------------------------------------------------------------------|-------------|----|----|----|------|---------|------|------|-------|-------|-------|-------|--------|---------|-----------|
| B2R4U3         |               | cDNA, FLJ92217, highly similar to Homo sapiens ubiquitin-conjugating enzyme E2C (UBE2C), mRNA OS=Homo sapiens PE=2 SV=1 | 11.73184358 | 2  | 2  | 2  | 179  | 19.606  | 7.37 | 85.8 | 86.6  | 99.5  | 128.1 | 86.2  | 113.8  | 1.32019 | 0.0466084 |
| Q9UPZ3         | HPS5          | Hermansky-Pudlak syndrome 5 protein OS=Homo sapiens GN=HPS5 PE=1 SV=2                                                   | 0.797165633 | 1  | 1  | 1  | 1129 | 127.368 | 5.54 | 71.1 | 101.3 | 116.7 | 110.9 | 86.2  | 113.8  | 1.32019 | 0.0466084 |
| A0A024R<br>B32 | PTGES3        | Prostaglandin E synthase 3 (Cytosolic), isoform CRA_a OS=Homo sapiens GN=PTGES3 PE=4 SV=1                               | 38.75       | 6  | 18 | 6  | 160  | 18.685  | 4.54 | 89.3 | 83.1  | 115.4 | 112.1 | 86.2  | 113.75 | 1.31961 | 0.0469784 |
| P15121         | AKR1B1        | Aldose reductase OS=Homo sapiens GN=AKR1B1 PE=1 SV=3                                                                    | 47.15189873 | 13 | 26 | 12 | 316  | 35.83   | 6.98 | 85.1 | 87.3  | 117.3 | 110.2 | 86.2  | 113.75 | 1.31961 | 0.0469784 |
| P31153         | MAT2A         | S-adenosylmethionine synthase isoform type-2 OS=Homo sapiens GN=MAT2A PE=1 SV=1                                         | 39.74683544 | 14 | 20 | 14 | 395  | 43.633  | 6.48 | 88.6 | 83.9  | 118.4 | 109.1 | 86.25 | 113.75 | 1.31884 | 0.0474705 |
| P50990         | CCT8          | T-complex protein 1 subunit theta OS=Homo sapiens GN=CCT8 PE=1 SV=4                                                     | 59.12408759 | 28 | 76 | 28 | 548  | 59.583  | 5.6  | 85.9 | 86.6  | 118   | 109.5 | 86.25 | 113.75 | 1.31884 | 0.0474705 |
| H0YB56         | MTDH          | Protein LYRIC (Fragment) OS=Homo sapiens GN=MTDH PE=1 SV=1                                                              | 33.48214286 | 8  | 15 | 1  | 224  | 24.502  | 9.76 | 79.8 | 92.7  | 102.1 | 125.4 | 86.25 | 113.75 | 1.31884 | 0.0474705 |
| A0A024R9<br>62 | hCG_40<br>889 | HCG40889, isoform CRA_b OS=Homo sapiens GN=hCG_40889 PE=4 SV=1                                                          | 1.462225833 | 1  | 5  | 1  | 1231 | 138.979 | 6.62 | 79.5 | 93    | 78.4  | 149.1 | 86.25 | 113.75 | 1.31884 | 0.0474705 |
| Q6FHV6         | ENO2          | ENO2 protein OS=Homo sapiens GN=ENO2 PE=1 SV=1                                                                          | 12.67281106 | 3  | 15 | 1  | 434  | 47.239  | 5.03 | 90.9 | 81.7  | 119.7 | 107.8 | 86.3  | 113.75 | 1.31808 | 0.0479666 |
| Q496C9         | DTD1          | D-tyrosyl-tRNA(Tyr) deacylase OS=Homo sapiens GN=DTD1 PE=2 SV=1                                                         | 7.177033493 | 1  | 1  | 1  | 209  | 23.469  | 8.35 | 93.1 | 79.5  | 117.5 | 109.9 | 86.3  | 113.7  | 1.3175  | 0.0483458 |



|                |        |                                                                                                                                                                                            |             |    |    |    |      |         |       |       |       |       |       |        |        |              |           |
|----------------|--------|--------------------------------------------------------------------------------------------------------------------------------------------------------------------------------------------|-------------|----|----|----|------|---------|-------|-------|-------|-------|-------|--------|--------|--------------|-----------|
| Q5STK2         | PFDN6  | Prefoldin subunit 6, isoform CRA_b<br>OS=Homo sapiens GN=PFDN6<br>PE=2 SV=1                                                                                                                | 28.68217054 | 5  | 6  | 5  | 129  | 14.574  | 8.88  | 90    | 82.6  | 121.1 | 106.3 | 86.3   | 113.7  | 1.3175       | 0.0483458 |
| O43157         | PLXNB1 | Plexin-B1 OS=Homo sapiens<br>GN=PLXNB1 PE=1 SV=3                                                                                                                                           | 0.608899297 | 1  | 1  | 1  | 2135 | 232.151 | 5.49  | 93.6  | 79.1  | 118.8 | 108.5 | 86.35  | 113.65 | 1.31616      | 0.0492346 |
| A0A140V<br>KA6 |        | Testis secretory sperm-binding<br>protein Li 233m OS=Homo sapiens<br>PE=2 SV=1                                                                                                             | 27.37127371 | 9  | 24 | 9  | 369  | 41.305  | 5.27  | 90.9  | 81.8  | 119.9 | 107.4 | 86.35  | 113.65 | 1.31616      | 0.0492346 |
| A0A024R1<br>A3 | UBE1   | Testicular secretory protein Li 63<br>OS=Homo sapiens GN=UBE1<br>PE=2 SV=1                                                                                                                 | 29.11153119 | 25 | 60 | 25 | 1058 | 117.774 | 5.76  | 90.7  | 82    | 121.1 | 106.2 | 86.35  | 113.65 | 1.31616      | 0.0492346 |
| Q9Y2S0         | POLR1D | DNA-directed RNA polymerases I<br>and III subunit RPAC2 OS=Homo<br>sapiens GN=POLR1D PE=1 SV=1                                                                                             | 8.270676692 | 1  | 1  | 1  | 133  | 15.227  | 5.8   | 110   | 108.2 | 93.4  | 88.4  | 109.1  | 90.9   | 0.83318<br>1 | 0.0423462 |
| A8K778         |        | cDNA FLJ76902, highly similar to<br>Homo sapiens nuclear factor of<br>kappa light polypeptide gene<br>enhancer in B-cells inhibitor-like 1<br>(NFKBIL1), mRNA OS=Homo<br>sapiens PE=2 SV=1 | 3.937007874 | 1  | 1  | 1  | 381  | 43.207  | 7.3   | 118   | 100.2 | 86.2  | 95.6  | 109.1  | 90.9   | 0.83318<br>1 | 0.0423462 |
| A0A0G2J<br>K44 | BRD2   | Bromodomain-containing protein 2<br>OS=Homo sapiens GN=BRD2<br>PE=1 SV=1                                                                                                                   | 4.90430622  | 5  | 6  | 3  | 836  | 92.009  | 9.16  | 114.8 | 103.4 | 93.6  | 88.2  | 109.1  | 90.9   | 0.83318<br>1 | 0.0423462 |
| A0A087W<br>ZE9 | HMG3   | High mobility group nucleosome-<br>binding domain-containing protein<br>3 OS=Homo sapiens GN=HMG3<br>PE=1 SV=1                                                                             | 14.61538462 | 2  | 3  | 2  | 130  | 13.948  | 9.91  | 108.8 | 109.5 | 89.1  | 92.6  | 109.15 | 90.85  | 0.83234<br>1 | 0.0413117 |
| H7C1M2         | SON    | Protein SON (Fragment)<br>OS=Homo sapiens GN=SON<br>PE=1 SV=1                                                                                                                              | 28.26685007 | 28 | 43 | 2  | 1454 | 159.92  | 9.13  | 108.5 | 109.8 | 90.5  | 91.2  | 109.15 | 90.85  | 0.83234<br>1 | 0.0413117 |
| P26373         | RPL13  | 60S ribosomal protein L13<br>OS=Homo sapiens GN=RPL13<br>PE=1 SV=4                                                                                                                         | 42.65402844 | 10 | 37 | 10 | 211  | 24.247  | 11.65 | 109.4 | 108.9 | 84.4  | 97.3  | 109.15 | 90.85  | 0.83234<br>1 | 0.0413117 |

|                |        |                                                                                                              |             |    |    |    |     |         |       |       |       |      |      |        |       |              |           |
|----------------|--------|--------------------------------------------------------------------------------------------------------------|-------------|----|----|----|-----|---------|-------|-------|-------|------|------|--------|-------|--------------|-----------|
| Q01151         | CD83   | CD83 antigen OS=Homo sapiens<br>GN=CD83 PE=1 SV=1                                                            | 4.87804878  | 1  | 1  | 1  | 205 | 23.027  | 8.18  | 105.4 | 112.9 | 98.9 | 82.8 | 109.15 | 90.85 | 0.83234<br>1 | 0.0413117 |
| P20674         | COX5A  | Cytochrome c oxidase subunit 5A,<br>mitochondrial OS=Homo sapiens<br>GN=COX5A PE=1 SV=2                      | 38          | 8  | 39 | 8  | 150 | 16.752  | 6.79  | 111.5 | 106.9 | 91.2 | 90.5 | 109.2  | 90.85 | 0.83196      | 0.0408489 |
| A0A024R<br>BW9 | CA5B   | Carbonic anhydrase VB,<br>mitochondrial, isoform CRA_c<br>OS=Homo sapiens GN=CA5B<br>PE=4 SV=1               | 17.35015773 | 4  | 4  | 4  | 317 | 36.41   | 7.81  | 112.6 | 105.8 | 85   | 96.7 | 109.2  | 90.85 | 0.83196      | 0.0408489 |
| A0A024R2<br>Q4 | RPL15  | Ribosomal protein L15 OS=Homo<br>sapiens GN=RPL15 PE=3 SV=1                                                  | 50.49019608 | 12 | 57 | 12 | 204 | 24.131  | 11.62 | 103.7 | 114.6 | 85.5 | 96.1 | 109.15 | 90.8  | 0.83188<br>3 | 0.0407559 |
| P63218         | GNG5   | Guanine nucleotide-binding protein<br>G(I)/G(S)/G(O) subunit gamma-5<br>OS=Homo sapiens GN=GNG5<br>PE=1 SV=3 | 33.82352941 | 3  | 4  | 3  | 68  | 7.314   | 9.85  | 99    | 119.4 | 89.6 | 92   | 109.2  | 90.8  | 0.83150<br>2 | 0.0402985 |
| A0A0J9YX<br>F2 | PON2   | Paraoxonase 2, isoform CRA_a<br>OS=Homo sapiens GN=PON2<br>PE=1 SV=1                                         | 37.86666667 | 10 | 29 | 6  | 375 | 41.501  | 5.72  | 111.6 | 106.9 | 95.5 | 85.9 | 109.25 | 90.7  | 0.83020<br>6 | 0.0387732 |
| A0A0A0M<br>S29 | MFF    | Mitochondrial fission factor<br>OS=Homo sapiens GN=MFF PE=1<br>SV=1                                          | 42.53393665 | 8  | 28 | 1  | 221 | 25.286  | 8.76  | 101.4 | 117.1 | 91.8 | 89.6 | 109.25 | 90.7  | 0.83020<br>6 | 0.0387732 |
| P23497         | SP100  | Nuclear autoantigen Sp-100<br>OS=Homo sapiens GN=SP100<br>PE=1 SV=3                                          | 10.80773606 | 9  | 19 | 6  | 879 | 100.354 | 8.22  | 111.6 | 107.1 | 93.6 | 87.7 | 109.35 | 90.65 | 0.82899      | 0.0373841 |
| P17568         | NDUFB7 | NADH dehydrogenase<br>[ubiquinone] 1 beta subcomplex<br>subunit 7 OS=Homo sapiens<br>GN=NDUFB7 PE=1 SV=4     | 50.3649635  | 5  | 15 | 5  | 137 | 16.391  | 8.92  | 104.1 | 114.6 | 85.2 | 96.1 | 109.35 | 90.65 | 0.82899      | 0.0373841 |
| P20645         | M6PR   | Cation-dependent mannose-6-<br>phosphate receptor OS=Homo<br>sapiens GN=M6PR PE=1 SV=1                       | 33.21299639 | 8  | 22 | 8  | 277 | 30.973  | 5.83  | 99.8  | 118.9 | 83.9 | 97.4 | 109.35 | 90.65 | 0.82899      | 0.0373841 |
| Q8N5A5         | ZGPAT  | Zinc finger CCCH-type with G<br>patch domain-containing protein                                              | 3.389830508 | 1  | 1  | 1  | 531 | 57.324  | 5.43  | 113   | 105.8 | 93.7 | 87.5 | 109.4  | 90.6  | 0.82815<br>4 | 0.0364532 |

|            |          |                                                                                                                                                          |             |   |    |   |      |         |      |       |       |      |      |        |       |          |           |  |
|------------|----------|----------------------------------------------------------------------------------------------------------------------------------------------------------|-------------|---|----|---|------|---------|------|-------|-------|------|------|--------|-------|----------|-----------|--|
|            |          | OS=Homo sapiens GN=ZGPAT<br>PE=1 SV=3                                                                                                                    |             |   |    |   |      |         |      |       |       |      |      |        |       |          |           |  |
| Q00597     | FANCC    | Fanconi anemia group C protein<br>OS=Homo sapiens GN=FANCC<br>PE=1 SV=1                                                                                  | 1.433691756 | 1 | 1  | 1 | 558  | 63.388  | 6.15 | 103.1 | 115.7 | 89.7 | 91.5 | 109.4  | 90.6  | 0.828154 | 0.0364532 |  |
| Q14548     | COX7A2L  | Cytochrome c oxidase subunit 7A-related protein, mitochondrial<br>OS=Homo sapiens GN=COX7A2L<br>PE=1 SV=2                                                | 41.22807018 | 5 | 6  | 5 | 114  | 12.607  | 9.42 | 84.6  | 134.2 | 90.6 | 90.6 | 109.4  | 90.6  | 0.828154 | 0.0364532 |  |
| Q02224     | CENPE    | Centromere-associated protein E<br>OS=Homo sapiens GN=CENPE<br>PE=1 SV=2                                                                                 | 0.481303221 | 1 | 1  | 1 | 2701 | 316.219 | 5.64 | 116.6 | 102.3 | 90.4 | 90.7 | 109.45 | 90.55 | 0.827318 | 0.035542  |  |
| Q8WYQ5     | DGCR8    | Microprocessor complex subunit<br>DGCR8 OS=Homo sapiens<br>GN=DGCR8 PE=1 SV=1                                                                            | 2.457956016 | 1 | 1  | 1 | 773  | 85.991  | 5.95 | 104.7 | 114.2 | 83.9 | 97.2 | 109.45 | 90.55 | 0.827318 | 0.035542  |  |
| Q01196     | RUNX1    | Runt-related transcription factor 1<br>OS=Homo sapiens GN=RUNX1<br>PE=1 SV=3                                                                             | 3.090507726 | 1 | 1  | 1 | 453  | 48.706  | 9.35 | 115.5 | 103.4 | 85.1 | 95.9 | 109.45 | 90.5  | 0.826862 | 0.0350515 |  |
| A8KA68     |          | cDNA FLJ75833, highly similar to<br>Homo sapiens membrane-bound<br>transcription factor peptidase, site<br>2 (MBTPS2), mRNA OS=Homo<br>sapiens PE=2 SV=1 | 3.468208092 | 2 | 2  | 2 | 519  | 57.417  | 7.49 | 110.4 | 108.6 | 92.5 | 88.5 | 109.5  | 90.5  | 0.826484 | 0.0346503 |  |
| Q9BSK2     | SLC25A33 | Solute carrier family 25 member 33<br>OS=Homo sapiens GN=SLC25A33<br>PE=1 SV=1                                                                           | 6.230529595 | 2 | 2  | 1 | 321  | 35.352  | 9.6  | 109.4 | 109.7 | 86.2 | 94.7 | 109.55 | 90.45 | 0.82565  | 0.0337776 |  |
| A0A024R5H0 | BANF1    | Barrier to autointegration factor 1,<br>isoform CRA_a OS=Homo sapiens<br>GN=BANF1 PE=4 SV=1                                                              | 79.7752809  | 7 | 33 | 7 | 89   | 10.052  | 6.09 | 107.9 | 111.2 | 89.7 | 91.2 | 109.55 | 90.45 | 0.82565  | 0.0337776 |  |
| P55317     | FOXA1    | Hepatocyte nuclear factor 3-alpha<br>OS=Homo sapiens GN=FOXA1<br>PE=1 SV=2                                                                               | 11.65254237 | 2 | 2  | 2 | 472  | 49.116  | 8.82 | 106.2 | 113   | 89.7 | 91.2 | 109.6  | 90.45 | 0.825274 | 0.0333893 |  |

|                |              |                                                                                                       |             |    |    |    |     |        |      |       |       |      |       |        |       |              |           |
|----------------|--------------|-------------------------------------------------------------------------------------------------------|-------------|----|----|----|-----|--------|------|-------|-------|------|-------|--------|-------|--------------|-----------|
| A0A024QZ<br>N7 | C10orf7<br>0 | Chromosome 10 open reading<br>frame 70, isoform CRA_b<br>OS=Homo sapiens GN=C10orf70<br>PE=4 SV=1     | 44.44444444 | 5  | 26 | 5  | 108 | 12.191 | 9.09 | 107   | 112.2 | 83.8 | 97.1  | 109.6  | 90.45 | 0.82527<br>4 | 0.0333893 |
| P78386         | KRT85        | Keratin, type II cuticular Hb5<br>OS=Homo sapiens GN=KRT85<br>PE=1 SV=1                               | 5.128205128 | 3  | 11 | 2  | 507 | 55.766 | 6.55 | 100.9 | 118.3 | 90.3 | 90.6  | 109.6  | 90.45 | 0.82527<br>4 | 0.0333893 |
| Q8N8J7         | C4orf32      | Uncharacterized protein C4orf32<br>OS=Homo sapiens GN=C4orf32<br>PE=2 SV=2                            | 7.575757576 | 1  | 1  | 1  | 132 | 14.643 | 4.7  | 115.3 | 103.9 | 88.8 | 92    | 109.6  | 90.4  | 0.82481<br>8 | 0.0329238 |
| O60476         | MAN1A2       | Mannosyl-oligosaccharide 1,2-<br>alpha-mannosidase IB OS=Homo<br>sapiens GN=MAN1A2 PE=1 SV=1          | 6.24024961  | 4  | 4  | 4  | 641 | 72.957 | 7.61 | 111.2 | 108   | 77.1 | 103.7 | 109.6  | 90.4  | 0.82481<br>8 | 0.0329238 |
| A0A024R5<br>C4 | RTN3         | Reticulon OS=Homo sapiens<br>GN=RTN3 PE=4 SV=1                                                        | 28.38983051 | 4  | 11 | 1  | 236 | 25.593 | 8.51 | 106.6 | 112.6 | 82.8 | 98    | 109.6  | 90.4  | 0.82481<br>8 | 0.0329238 |
| A0A024R3<br>J1 | TRIM29       | Tripartite motif-containing 29,<br>isoform CRA_a OS=Homo sapiens<br>GN=TRIM29 PE=4 SV=1               | 45.06802721 | 23 | 43 | 23 | 588 | 65.793 | 7.15 | 103.6 | 115.6 | 92   | 88.8  | 109.6  | 90.4  | 0.82481<br>8 | 0.0329238 |
| Q68CP4         | HGSNA<br>T   | Heparan-alpha-glucosaminide N-<br>acetyltransferase OS=Homo<br>sapiens GN=HGSNAT PE=1 SV=2            | 2.111613876 | 1  | 1  | 1  | 663 | 73.247 | 8.4  | 99.2  | 120   | 83.3 | 97.5  | 109.6  | 90.4  | 0.82481<br>8 | 0.0329238 |
| B3KM74         |              | cDNA FLJ10425 fis, clone<br>NT2RP1000326, highly similar to<br>Metaxin-2 OS=Homo sapiens<br>PE=2 SV=1 | 28.13688213 | 7  | 20 | 7  | 263 | 29.614 | 6.77 | 107.3 | 112   | 80.5 | 100.2 | 109.65 | 90.35 | 0.82398<br>5 | 0.0320883 |
| E7ESC7         | MAEA         | Macrophage erythroblast attacher<br>OS=Homo sapiens GN=MAEA<br>PE=1 SV=1                              | 1.843317972 | 1  | 1  | 1  | 434 | 49.361 | 8.98 | 141.5 | 77.9  | 91.7 | 89    | 109.7  | 90.35 | 0.82361      | 0.031717  |
| J3QLM1         | STARD3       | StAR-related lipid transfer protein 3<br>OS=Homo sapiens GN=STARD3<br>PE=1 SV=1                       | 3.789473684 | 1  | 1  | 1  | 475 | 52.508 | 8.62 | 113   | 106.4 | 85.8 | 94.9  | 109.7  | 90.35 | 0.82361      | 0.031717  |

|            |          |                                                                                                                                           |             |    |    |    |      |         |      |       |       |      |       |        |       |          |           |
|------------|----------|-------------------------------------------------------------------------------------------------------------------------------------------|-------------|----|----|----|------|---------|------|-------|-------|------|-------|--------|-------|----------|-----------|
| A0A024R466 | ITM2C    | Integral membrane protein 2C, isoform CRA_a OS=Homo sapiens GN=ITM2C PE=4 SV=1                                                            | 7.490636704 | 1  | 1  | 1  | 267  | 30.204  | 8    | 121.2 | 98.2  | 94.2 | 86.4  | 109.7  | 90.3  | 0.823154 | 0.0312711 |
| O94806     | PRKD3    | Serine/threonine-protein kinase D3 OS=Homo sapiens GN=PRKD3 PE=1 SV=1                                                                     | 1.011235955 | 1  | 1  | 1  | 890  | 100.406 | 6.87 | 115.7 | 103.8 | 88   | 92.6  | 109.75 | 90.3  | 0.822779 | 0.0309081 |
| Q9BX26     | SYCP2    | Synaptonemal complex protein 2 OS=Homo sapiens GN=SYCP2 PE=2 SV=2                                                                         | 0.45751634  | 1  | 1  | 1  | 1530 | 175.529 | 8.85 | 104.3 | 115.1 | 77.6 | 102.9 | 109.7  | 90.25 | 0.822698 | 0.0308304 |
| A8K0I8     |          | cDNA FLJ76207, highly similar to Homo sapiens delta-notch-like EGF repeat-containing transmembrane (DNER), mRNA OS=Homo sapiens PE=2 SV=1 | 2.035278155 | 1  | 1  | 1  | 737  | 78.476  | 5.21 | 107.5 | 112   | 94.1 | 86.4  | 109.75 | 90.25 | 0.822323 | 0.0304717 |
| Q9UJT1     | TUBD1    | Tubulin delta chain OS=Homo sapiens GN=TUBD1 PE=2 SV=2                                                                                    | 3.752759382 | 1  | 1  | 1  | 453  | 51.001  | 6.83 | 118.8 | 100.7 | 84.7 | 95.8  | 109.75 | 90.25 | 0.822323 | 0.0304717 |
| Q13488     | TCIRG1   | V-type proton ATPase 116 kDa subunit a isoform 3 OS=Homo sapiens GN=TCIRG1 PE=1 SV=3                                                      | 17.8313253  | 12 | 14 | 12 | 830  | 92.908  | 7.12 | 115.3 | 104.2 | 94.3 | 86.2  | 109.75 | 90.25 | 0.822323 | 0.0304717 |
| A0A024R3W2 | TOMM20   | Translocase of outer mitochondrial membrane 20 homolog (Yeast), isoform CRA_a OS=Homo sapiens GN=TOMM20 PE=3 SV=1                         | 31.03448276 | 3  | 4  | 3  | 145  | 16.288  | 8.6  | 90.8  | 128.7 | 90   | 90.5  | 109.75 | 90.25 | 0.822323 | 0.0304717 |
| Q9BY49     | PECR     | Peroxisomal trans-2-enoyl-CoA reductase OS=Homo sapiens GN=PECR PE=1 SV=2                                                                 | 10.56105611 | 3  | 3  | 3  | 303  | 32.524  | 8.81 | 106.4 | 113.2 | 92.4 | 88.1  | 109.8  | 90.25 | 0.821949 | 0.0301168 |
| Q8IYL3     | C1orf174 | UPF0688 protein C1orf174 OS=Homo sapiens GN=C1orf174 PE=1 SV=2                                                                            | 5.761316872 | 1  | 1  | 1  | 243  | 25.961  | 6.9  | 114   | 105.6 | 84.9 | 95.5  | 109.8  | 90.2  | 0.821494 | 0.0296899 |
| A0A140VJN5 |          | Testicular tissue protein Li 111 OS=Homo sapiens PE=2 SV=1                                                                                | 0.580720093 | 1  | 2  | 1  | 1722 | 199.176 | 6.19 | 110.6 | 109.1 | 88   | 92.3  | 109.85 | 90.15 | 0.820665 | 0.0289252 |
| A8K761     | NDUFB1   | NADH dehydrogenase (Ubiquinone) 1 beta subcomplex,                                                                                        | 56.97674419 | 10 | 33 | 10 | 172  | 20.763  | 8.48 | 104   | 115.7 | 89.2 | 91.1  | 109.85 | 90.15 | 0.820665 | 0.0289252 |

|                |        |                                                                                                                                |             |    |     |   |      |         |       |       |       |      |      |        |       |              |           |  |
|----------------|--------|--------------------------------------------------------------------------------------------------------------------------------|-------------|----|-----|---|------|---------|-------|-------|-------|------|------|--------|-------|--------------|-----------|--|
|                |        | 10, 22kDa, isoform CRA_b<br>OS=Homo sapiens GN=NDUFB10<br>PE=2 SV=1                                                            |             |    |     |   |      |         |       |       |       |      |      |        |       |              |           |  |
| Q59EE7         |        | Pro-alpha-1 type V collagen variant<br>(Fragment) OS=Homo sapiens<br>PE=2 SV=1                                                 | 8.649553571 | 9  | 15  | 1 | 1792 | 178.407 | 5     | 119.8 | 100   | 91.8 | 88.4 | 109.9  | 90.1  | 0.81983<br>6 | 0.0281775 |  |
| Q9Y232         | CDYL   | Chromodomain Y-like protein<br>OS=Homo sapiens GN=CDYL<br>PE=1 SV=2                                                            | 14.88294314 | 7  | 15  | 7 | 598  | 66.44   | 9.45  | 113.1 | 106.8 | 86.3 | 93.9 | 109.95 | 90.1  | 0.81946<br>3 | 0.0278462 |  |
| A0A0S2Z4<br>G7 | NPM1   | Nucleophosmin (Nucleolar<br>phosphoprotein B23, numatrin),<br>isoform CRA_f (Fragment)<br>OS=Homo sapiens GN=NPM1<br>PE=2 SV=1 | 55.09433962 | 15 | 153 | 1 | 265  | 29.446  | 4.61  | 105.4 | 114.5 | 90.9 | 89.2 | 109.95 | 90.05 | 0.81900<br>9 | 0.0274465 |  |
| Q8WVX3         | C4orf3 | Uncharacterized protein C4orf3<br>OS=Homo sapiens GN=C4orf3<br>PE=1 SV=2                                                       | 40.90909091 | 2  | 7   | 2 | 66   | 7.599   | 5.29  | 95.8  | 124.1 | 76.1 | 104  | 109.95 | 90.05 | 0.81900<br>9 | 0.0274465 |  |
| Q53HV5         |        | Androgen-induced 1 variant<br>(Fragment) OS=Homo sapiens<br>PE=2 SV=1                                                          | 5.042016807 | 1  | 2   | 1 | 238  | 27.426  | 7.17  | 80.7  | 139.2 | 90.4 | 89.7 | 109.95 | 90.05 | 0.81900<br>9 | 0.0274465 |  |
| A1A5C4         | RRBP1  | RRBP1 protein OS=Homo sapiens<br>GN=RRBP1 PE=2 SV=1                                                                            | 52.03426124 | 50 | 111 | 2 | 934  | 102.763 | 5.38  | 118.3 | 101.7 | 79.1 | 101  | 110    | 90.05 | 0.81863<br>6 | 0.0271228 |  |
| P09669         | COX6C  | Cytochrome c oxidase subunit 6C<br>OS=Homo sapiens GN=COX6C<br>PE=1 SV=2                                                       | 52          | 8  | 26  | 8 | 75   | 8.776   | 10.39 | 99.5  | 120.5 | 87.6 | 92.5 | 110    | 90.05 | 0.81863<br>6 | 0.0271228 |  |
| A0A024Q<br>YW3 | PLP2   | Proteolipid protein 2 (Colonic<br>epithelium-enriched), isoform<br>CRA_a OS=Homo sapiens<br>GN=PLP2 PE=4 SV=1                  | 9.868421053 | 1  | 4   | 1 | 152  | 16.68   | 7.24  | 113.5 | 106.4 | 87.5 | 92.5 | 109.95 | 90    | 0.81855<br>4 | 0.0270515 |  |
| Q8N9T2         | NKAPP1 | Putative uncharacterized protein<br>CXorf42 OS=Homo sapiens<br>GN=NKAPP1 PE=5 SV=3                                             | 5.6         | 1  | 1   | 1 | 125  | 14.154  | 8.94  | 153.2 | 66.8  | 96.2 | 83.8 | 110    | 90    | 0.81818<br>2 | 0.0267318 |  |

|                |                 |                                                                                                                   |             |    |    |    |      |        |       |       |       |      |       |        |       |              |           |
|----------------|-----------------|-------------------------------------------------------------------------------------------------------------------|-------------|----|----|----|------|--------|-------|-------|-------|------|-------|--------|-------|--------------|-----------|
| P18085         | ARF4            | ADP-ribosylation factor 4<br>OS=Homo sapiens GN=ARF4<br>PE=1 SV=3                                                 | 52.77777778 | 9  | 23 | 6  | 180  | 20.498 | 7.14  | 137.3 | 82.7  | 96.1 | 83.9  | 110    | 90    | 0.81818<br>2 | 0.0267318 |
| Q96EL2         | MRPS24          | 28S ribosomal protein S24,<br>mitochondrial OS=Homo sapiens<br>GN=MRPS24 PE=1 SV=1                                | 5.389221557 | 1  | 1  | 1  | 167  | 19.003 | 9.38  | 116.1 | 103.9 | 72.2 | 107.7 | 110    | 89.95 | 0.81772<br>7 | 0.0263455 |
| Q9H9Q4         | NHEJ1           | Non-homologous end-joining factor<br>1 OS=Homo sapiens GN=NHEJ1<br>PE=1 SV=1                                      | 8.361204013 | 2  | 3  | 2  | 299  | 33.316 | 5.97  | 114.8 | 105.2 | 88.4 | 91.5  | 110    | 89.95 | 0.81772<br>7 | 0.0263455 |
| P27635         | RPL10           | 60S ribosomal protein L10<br>OS=Homo sapiens GN=RPL10<br>PE=1 SV=4                                                | 45.79439252 | 9  | 41 | 1  | 214  | 24.588 | 10.08 | 110   | 110.1 | 81.1 | 98.8  | 110.05 | 89.95 | 0.81735<br>6 | 0.0260332 |
| O75489         | NDUFS3          | NADH dehydrogenase<br>[ubiquinone] iron-sulfur protein 3,<br>mitochondrial OS=Homo sapiens<br>GN=NDUFS3 PE=1 SV=1 | 44.31818182 | 10 | 29 | 10 | 264  | 30.223 | 7.5   | 107.5 | 112.6 | 82.9 | 97    | 110.05 | 89.95 | 0.81735<br>6 | 0.0260332 |
| H0UI06         | COX7A2          | Cytochrome c oxidase subunit<br>7A2, mitochondrial OS=Homo<br>sapiens GN=COX7A2 PE=1 SV=1                         | 20          | 2  | 9  | 2  | 115  | 12.836 | 9.13  | 106.3 | 113.9 | 93.6 | 86.2  | 110.1  | 89.9  | 0.81653      | 0.0253503 |
| Q13948         | CUX1            | Protein CASP OS=Homo sapiens<br>GN=CUX1 PE=1 SV=2                                                                 | 22.86135693 | 17 | 21 | 2  | 678  | 77.408 | 5.44  | 115.7 | 104.6 | 90.1 | 89.7  | 110.15 | 89.9  | 0.81616      | 0.0250485 |
| A0A024R4<br>N0 | hCG_16<br>40809 | HCG1640809, isoform CRA_b<br>OS=Homo sapiens<br>GN=hCG_1640809 PE=4 SV=1                                          | 10.55900621 | 2  | 2  | 2  | 322  | 35.25  | 8.15  | 113.1 | 107.1 | 63.3 | 116.4 | 110.1  | 89.85 | 0.81607<br>6 | 0.0249809 |
| Q8NBZ0         | INO80E          | INO80 complex subunit E<br>OS=Homo sapiens GN=INO80E<br>PE=1 SV=1                                                 | 3.278688525 | 1  | 1  | 1  | 244  | 26.462 | 8.34  | 117.9 | 102.4 | 81.7 | 98    | 110.15 | 89.85 | 0.81570<br>6 | 0.024683  |
| Q2KHT3         | CLEC16<br>A     | Protein CLEC16A OS=Homo<br>sapiens GN=CLEC16A PE=1<br>SV=2                                                        | 1.044634378 | 1  | 1  | 1  | 1053 | 117.64 | 5.86  | 112.7 | 107.7 | 78.3 | 101.4 | 110.2  | 89.85 | 0.81533<br>6 | 0.0243882 |
| P27338         | MAOB            | Amine oxidase [flavin-containing] B<br>OS=Homo sapiens GN=MAOB<br>PE=1 SV=3                                       | 45.76923077 | 21 | 64 | 21 | 520  | 58.725 | 7.5   | 102.8 | 117.6 | 88.6 | 91.1  | 110.2  | 89.85 | 0.81533<br>6 | 0.0243882 |

|            |           |                                                                                                                                                     |             |    |     |    |      |        |       |       |       |       |       |        |       |          |           |
|------------|-----------|-----------------------------------------------------------------------------------------------------------------------------------------------------|-------------|----|-----|----|------|--------|-------|-------|-------|-------|-------|--------|-------|----------|-----------|
| P13010     | XRCC5     | X-ray repair cross-complementing protein 5 OS=Homo sapiens GN=XRCC5 PE=1 SV=3                                                                       | 39.07103825 | 30 | 86  | 30 | 732  | 82.652 | 5.81  | 115.9 | 104.5 | 92    | 87.6  | 110.2  | 89.8  | 0.814882 | 0.0240308 |
| Q8NBU5     | ATAD1     | ATPase family AAA domain-containing protein 1 OS=Homo sapiens GN=ATAD1 PE=1 SV=1                                                                    | 37.67313019 | 12 | 30  | 12 | 361  | 40.718 | 6.9   | 111   | 109.4 | 79.7  | 99.9  | 110.2  | 89.8  | 0.814882 | 0.0240308 |
| Q9UKA4     | AKAP11    | A-kinase anchor protein 11 OS=Homo sapiens GN=AKAP11 PE=1 SV=1                                                                                      | 0.368227249 | 1  | 1   | 1  | 1901 | 210.38 | 5.39  | 122.3 | 98.2  | 92    | 87.5  | 110.25 | 89.75 | 0.814059 | 0.0233936 |
| I6L9F7     | HIST1H2BM | Histone H2B (Fragment) OS=Homo sapiens GN=HIST1H2BM PE=2 SV=1                                                                                       | 65.94202899 | 11 | 301 | 1  | 138  | 15.147 | 10.24 | 113.7 | 106.8 | 100.9 | 78.6  | 110.25 | 89.75 | 0.814059 | 0.0233936 |
| A8K4V2     |           | cDNA FLJ75930, highly similar to Homo sapiens NADH dehydrogenase (ubiquinone) 1 alpha subcomplex, 9, 39kDa (NDUFA9), mRNA OS=Homo sapiens PE=2 SV=1 | 38.46153846 | 13 | 36  | 13 | 377  | 42.425 | 9.86  | 111.3 | 109.2 | 83.6  | 95.9  | 110.25 | 89.75 | 0.814059 | 0.0233936 |
| D3DU92     | RNPS1     | RNA binding protein S1 OS=Homo sapiens GN=RNPS1 PE=1 SV=1                                                                                           | 29.18032787 | 8  | 29  | 8  | 305  | 34.188 | 11.84 | 114   | 106.7 | 75.9  | 103.4 | 110.35 | 89.65 | 0.812415 | 0.0221628 |
| H0Y8C2     | RPL22L1   | 60S ribosomal protein L22-like 1 (Fragment) OS=Homo sapiens GN=RPL22L1 PE=1 SV=1                                                                    | 19.01408451 | 2  | 3   | 2  | 142  | 16.89  | 9.25  | 107.5 | 113.3 | 90.6  | 88.7  | 110.4  | 89.65 | 0.812047 | 0.0218949 |
| A0A059R2S3 | COX1      | Cytochrome c oxidase subunit 1 OS=Homo sapiens GN=COX1 PE=3 SV=1                                                                                    | 6.04288499  | 1  | 1   | 1  | 513  | 56.984 | 6.8   | 118.3 | 102.5 | 83.7  | 95.6  | 110.4  | 89.65 | 0.812047 | 0.0218949 |
| D3DSM6     | SLC19A1   | Solute carrier family 19 (Folate transporter), member 1, isoform CRA_f OS=Homo sapiens GN=SLC19A1 PE=4 SV=1                                         | 9.135399674 | 3  | 5   | 3  | 613  | 67.157 | 9.11  | 104   | 116.7 | 83.4  | 95.8  | 110.35 | 89.6  | 0.811962 | 0.0218332 |
| Q6DD87     | ZNF787    | Zinc finger protein 787 OS=Homo sapiens GN=ZNF787 PE=1 SV=3                                                                                         | 12.53263708 | 4  | 4   | 4  | 383  | 40.518 | 7.84  | 105.2 | 115.6 | 79.7  | 99.5  | 110.4  | 89.6  | 0.811594 | 0.0215687 |



|                |        |                                                                                                                                             |             |    |    |   |      |         |      |       |       |      |       |        |       |              |           |
|----------------|--------|---------------------------------------------------------------------------------------------------------------------------------------------|-------------|----|----|---|------|---------|------|-------|-------|------|-------|--------|-------|--------------|-----------|
| A0A024R2<br>41 | NFIL3  | Nuclear factor interleukin-3-<br>regulated protein OS=Homo<br>sapiens GN=NFIL3 PE=3 SV=1                                                    | 7.142857143 | 3  | 3  | 3 | 462  | 51.44   | 7.18 | 112.8 | 108.2 | 87.6 | 91.4  | 110.5  | 89.5  | 0.80995<br>5 | 0.0204219 |
| P14854         | COX6B1 | Cytochrome c oxidase subunit 6B1<br>OS=Homo sapiens GN=COX6B1<br>PE=1 SV=2                                                                  | 66.27906977 | 5  | 32 | 5 | 86   | 10.186  | 7.05 | 109.9 | 111.1 | 91   | 88    | 110.5  | 89.5  | 0.80995<br>5 | 0.0204219 |
| Q9NY64         | SLC2A8 | Solute carrier family 2, facilitated<br>glucose transporter member 8<br>OS=Homo sapiens GN=SLC2A8<br>PE=1 SV=3                              | 1.886792453 | 1  | 1  | 1 | 477  | 50.786  | 7.61 | 110.1 | 110.9 | 71.1 | 107.9 | 110.5  | 89.5  | 0.80995<br>5 | 0.0204219 |
| P56524         | HDAC4  | Histone deacetylase 4 OS=Homo<br>sapiens GN=HDAC4 PE=1 SV=3                                                                                 | 0.73800738  | 1  | 1  | 1 | 1084 | 118.966 | 6.96 | 98.3  | 122.8 | 86.4 | 92.5  | 110.55 | 89.45 | 0.80913<br>6 | 0.0198686 |
| A0A059R1<br>K5 | COX2   | Cytochrome c oxidase subunit 2<br>OS=Homo sapiens GN=COX2<br>PE=3 SV=1                                                                      | 30.83700441 | 6  | 28 | 1 | 227  | 25.543  | 4.89 | 104.2 | 117   | 93.3 | 85.6  | 110.6  | 89.45 | 0.80877      | 0.0196254 |
| Q17RV3         | LRRK2  | Leucine-rich repeat kinase 2<br>OS=Homo sapiens GN=LRRK2<br>PE=2 SV=1                                                                       | 0.633161852 | 2  | 2  | 2 | 2527 | 285.884 | 6.79 | 94.1  | 127.1 | 86.4 | 92.3  | 110.6  | 89.35 | 0.80786<br>6 | 0.019035  |
| P62854         | RPS26  | 40S ribosomal protein S26<br>OS=Homo sapiens GN=RPS26<br>PE=1 SV=3                                                                          | 44.34782609 | 4  | 27 | 4 | 115  | 13.007  | 11   | 105.9 | 115.5 | 74.4 | 104.2 | 110.7  | 89.3  | 0.80668<br>5 | 0.0182861 |
| B2R850         |        | cDNA, FLJ93740, highly similar to<br>Homo sapiens zinc finger protein<br>161 homolog (mouse) (ZFP161),<br>mRNA OS=Homo sapiens PE=2<br>SV=1 | 2.227171492 | 1  | 1  | 1 | 449  | 50.894  | 6.04 | 114.1 | 107.4 | 94.7 | 83.8  | 110.75 | 89.25 | 0.80586<br>9 | 0.0177836 |
| O95243         | MBD4   | Methyl-CpG-binding domain<br>protein 4 OS=Homo sapiens<br>GN=MBD4 PE=1 SV=1                                                                 | 1.379310345 | 1  | 1  | 1 | 580  | 66.009  | 8.82 | 104.3 | 117.4 | 69.3 | 109   | 110.85 | 89.15 | 0.80424      | 0.0168147 |
| B4DL14         |        | ATP synthase subunit gamma<br>OS=Homo sapiens PE=2 SV=1                                                                                     | 57.6        | 14 | 42 | 1 | 250  | 27.495  | 7.42 | 117.9 | 103.9 | 89.9 | 88.4  | 110.9  | 89.15 | 0.80387<br>7 | 0.0166051 |

|            |          |                                                                                                                               |             |   |    |   |      |         |       |       |       |      |       |        |       |          |           |
|------------|----------|-------------------------------------------------------------------------------------------------------------------------------|-------------|---|----|---|------|---------|-------|-------|-------|------|-------|--------|-------|----------|-----------|
| J3KTC1     | MSI2     | RNA-binding protein Musashi homolog 2 (Fragment) OS=Homo sapiens GN=MSI2 PE=1 SV=8                                            | 49.28571429 | 5 | 6  | 1 | 140  | 15.45   | 9.5   | 115.7 | 106   | 92.3 | 85.9  | 110.85 | 89.1  | 0.803789 | 0.0165544 |
| A0A024R8Z5 | BRP44    | Brain protein 44, isoform CRA_b OS=Homo sapiens GN=BRP44 PE=4 SV=1                                                            | 9.448818898 | 1 | 2  | 1 | 127  | 14.27   | 10.43 | 125.4 | 96.4  | 90.1 | 88.1  | 110.9  | 89.1  | 0.803427 | 0.0163477 |
| HOY7F4     | GNAS     | Guanine nucleotide-binding protein G(s) subunit alpha isoforms short (Fragment) OS=Homo sapiens GN=GNAS PE=1 SV=1             | 19.59798995 | 3 | 6  | 1 | 199  | 22.776  | 8.78  | 108.8 | 113   | 71.7 | 106.5 | 110.9  | 89.1  | 0.803427 | 0.0163477 |
| H9A532     |          | BCL6 corepressor-cyclin B3 fusion protein OS=Homo sapiens PE=2 SV=1                                                           | 1.481237656 | 3 | 3  | 3 | 3038 | 337.511 | 6.28  | 112.4 | 109.5 | 90.5 | 87.6  | 110.95 | 89.05 | 0.802614 | 0.0158921 |
| P99999     | CYCS     | Cytochrome c OS=Homo sapiens GN=CYCS PE=1 SV=2                                                                                | 61.9047619  | 7 | 16 | 7 | 105  | 11.741  | 9.57  | 123.2 | 98.8  | 93.5 | 84.5  | 111    | 89    | 0.801802 | 0.0154477 |
| P80723     | BASP1    | Brain acid soluble protein 1 OS=Homo sapiens GN=BASP1 PE=1 SV=2                                                               | 53.74449339 | 9 | 36 | 9 | 227  | 22.68   | 4.63  | 107.7 | 114.3 | 84.2 | 93.8  | 111    | 89    | 0.801802 | 0.0154477 |
| Q16594     | TAF9     | Transcription initiation factor TFIID subunit 9 OS=Homo sapiens GN=TAF9 PE=1 SV=1                                             | 10.98484848 | 3 | 3  | 1 | 264  | 28.956  | 8.66  | 119.9 | 102.2 | 78.7 | 99.1  | 111.05 | 88.9  | 0.80054  | 0.0147781 |
| P49006     | MARCKSL1 | MARCKS-related protein OS=Homo sapiens GN=MARCKSL1 PE=1 SV=2                                                                  | 8.717948718 | 2 | 2  | 2 | 195  | 19.517  | 4.67  | 110.7 | 111.4 | 80.3 | 97.5  | 111.05 | 88.9  | 0.80054  | 0.0147781 |
| B3KN59     |          | cDNA FLJ13673 fis, clone PLACE1011858, highly similar to BAG family molecular chaperone regulator 2 OS=Homo sapiens PE=2 SV=1 | 50.71090047 | 9 | 40 | 9 | 211  | 23.733  | 6.57  | 108.4 | 113.9 | 83.9 | 93.9  | 111.15 | 88.9  | 0.79982  | 0.014407  |
| S4R2Z7     | MRPL42   | 39S ribosomal protein L42, mitochondrial OS=Homo sapiens GN=MRPL42 PE=1 SV=1                                                  | 12.25806452 | 2 | 4  | 2 | 155  | 17.884  | 8.19  | 114.1 | 108.2 | 65.8 | 111.9 | 111.15 | 88.85 | 0.79937  | 0.0141792 |

|                |              |                                                                                                          |             |    |    |    |      |         |      |       |       |      |       |        |       |              |           |
|----------------|--------------|----------------------------------------------------------------------------------------------------------|-------------|----|----|----|------|---------|------|-------|-------|------|-------|--------|-------|--------------|-----------|
| P35680         | HNF1B        | Hepatocyte nuclear factor 1-beta<br>OS=Homo sapiens GN=HNF1B<br>PE=1 SV=1                                | 2.513464991 | 1  | 1  | 1  | 557  | 61.285  | 7.77 | 107.4 | 115   | 90.4 | 87.3  | 111.2  | 88.85 | 0.79901<br>1 | 0.0139994 |
| Q5TF85         | FAM46A       | Family with sequence similarity 46,<br>member A, isoform CRA_a<br>OS=Homo sapiens GN=FAM46A<br>PE=1 SV=1 | 2.676864245 | 1  | 1  | 1  | 523  | 59.082  | 6.27 | 111.1 | 111.2 | 81.2 | 96.4  | 111.15 | 88.8  | 0.79892      | 0.0139545 |
| Q86TW2         | ADCK1        | Uncharacterized aarF domain-<br>containing protein kinase 1<br>OS=Homo sapiens GN=ADCK1<br>PE=2 SV=2     | 15.66037736 | 5  | 6  | 5  | 530  | 60.538  | 8.6  | 116.1 | 106.3 | 82.7 | 94.9  | 111.2  | 88.8  | 0.79856<br>1 | 0.0137772 |
| A0A024R9<br>Y2 | KIAA126<br>7 | KIAA1267, isoform CRA_a<br>OS=Homo sapiens GN=KIAA1267<br>PE=4 SV=1                                      | 1.447963801 | 1  | 1  | 1  | 1105 | 120.892 | 8.75 | 108.1 | 114.3 | 72.9 | 104.7 | 111.2  | 88.8  | 0.79856<br>1 | 0.0137772 |
| E3SWF7         | HLA-A        | MHC class I antigen (Fragment)<br>OS=Homo sapiens GN=HLA-A<br>PE=3 SV=1                                  | 34.80662983 | 8  | 29 | 3  | 181  | 20.907  | 6.7  | 108.7 | 113.8 | 76.6 | 100.9 | 111.25 | 88.75 | 0.79775<br>3 | 0.0133852 |
| P29374         | ARID4A       | AT-rich interactive domain-<br>containing protein 4A OS=Homo<br>sapiens GN=ARID4A PE=1 SV=3              | 2.227525855 | 3  | 3  | 1  | 1257 | 142.664 | 5.1  | 113.4 | 109.1 | 74.6 | 102.8 | 111.25 | 88.7  | 0.79730<br>3 | 0.0131714 |
| Q68DH5         | LMBRD<br>2   | LMBR1 domain-containing protein<br>2 OS=Homo sapiens<br>GN=LMBRD2 PE=1 SV=1                              | 5.755395683 | 4  | 5  | 4  | 695  | 81.12   | 7.5  | 110.3 | 112.2 | 75.3 | 102.1 | 111.25 | 88.7  | 0.79730<br>3 | 0.0131714 |
| B3KM95         |              | Phosphatidate cytidyltransferase<br>OS=Homo sapiens PE=2 SV=1                                            | 4.269662921 | 1  | 3  | 1  | 445  | 51.326  | 7.09 | 107.9 | 114.7 | 85.2 | 92.2  | 111.3  | 88.7  | 0.79694<br>5 | 0.0130031 |
| B7Z613         | GPM6B        | Neuronal membrane glycoprotein<br>M6-b OS=Homo sapiens<br>GN=GPM6B PE=1 SV=1                             | 2.649006623 | 1  | 1  | 1  | 302  | 33.25   | 6.42 | 106.8 | 115.9 | 94.6 | 82.8  | 111.35 | 88.7  | 0.79658<br>7 | 0.0128367 |
| O75475         | PSIP1        | PC4 and SFRS1-interacting<br>protein OS=Homo sapiens<br>GN=PSIP1 PE=1 SV=1                               | 32.26415094 | 17 | 38 | 16 | 530  | 60.067  | 9.13 | 114.7 | 108   | 89.7 | 87.6  | 111.35 | 88.65 | 0.79613<br>8 | 0.0126306 |

|             |          |                                                                                                                 |             |    |     |    |      |        |      |       |       |      |       |        |       |          |            |
|-------------|----------|-----------------------------------------------------------------------------------------------------------------|-------------|----|-----|----|------|--------|------|-------|-------|------|-------|--------|-------|----------|------------|
| B7Z946      |          | Transmembrane channel-like protein OS=Homo sapiens PE=2 SV=1                                                    | 1.689860835 | 1  | 1   | 1  | 1006 | 114.78 | 8.21 | 105.6 | 117.1 | 79.3 | 98    | 111.35 | 88.65 | 0.796138 | 0.0126306  |
| Q8WUX1      | SLC38A5  | Sodium-coupled neutral amino acid transporter 5 OS=Homo sapiens GN=SLC38A5 PE=1 SV=1                            | 2.966101695 | 1  | 1   | 1  | 472  | 51.423 | 8.21 | 118.2 | 104.6 | 86.3 | 90.9  | 111.4  | 88.6  | 0.795332 | 0.0122675  |
| Q13151      | HNRNP A0 | Heterogeneous nuclear ribonucleoprotein A0 OS=Homo sapiens GN=HNRNPA0 PE=1 SV=1                                 | 39.01639344 | 11 | 51  | 9  | 305  | 30.822 | 9.29 | 108.6 | 114.2 | 74.9 | 102.2 | 111.4  | 88.55 | 0.794883 | 0.0120693  |
| A0A024R A51 | CDCA7L   | Cell division cycle associated 7-like, isoform CRA_d OS=Homo sapiens GN=CDCA7L PE=4 SV=1                        | 7.709251101 | 3  | 3   | 3  | 454  | 52.174 | 5.74 | 108   | 114.8 | 83.9 | 93.2  | 111.4  | 88.55 | 0.794883 | 0.0120693  |
| Q9BUH6      | C9orf142 | Protein PAXX OS=Homo sapiens GN=C9orf142 PE=1 SV=2                                                              | 15.19607843 | 2  | 2   | 2  | 204  | 21.626 | 5.48 | 119.5 | 103.4 | 91.2 | 85.9  | 111.45 | 88.55 | 0.794527 | 0.0119137  |
| Q8NBQ5      | HSD17B11 | Estradiol 17-beta-dehydrogenase 11 OS=Homo sapiens GN=HSD17B11 PE=1 SV=3                                        | 27          | 7  | 9   | 7  | 300  | 32.915 | 9.07 | 110.9 | 112   | 81.3 | 95.7  | 111.45 | 88.5  | 0.794078 | 0.0117204  |
| Q9H3R2      | MUC13    | Mucin-13 OS=Homo sapiens GN=MUC13 PE=1 SV=3                                                                     | 15.4296875  | 5  | 13  | 5  | 512  | 54.569 | 5.07 | 112.2 | 110.8 | 91.6 | 85.4  | 111.5  | 88.5  | 0.793722 | 0.011569   |
| Q14103      | HNRNP D  | Heterogeneous nuclear ribonucleoprotein D0 OS=Homo sapiens GN=HNRNPD PE=1 SV=1                                  | 32.11267606 | 12 | 36  | 10 | 355  | 38.41  | 7.81 | 107   | 116   | 81.8 | 95.1  | 111.5  | 88.45 | 0.793274 | 0.0113806  |
| Q04695      | KRT17    | Keratin, type I cytoskeletal 17 OS=Homo sapiens GN=KRT17 PE=1 SV=2                                              | 69.21296296 | 38 | 283 | 21 | 432  | 48.076 | 5.02 | 101   | 122.2 | 89.8 | 87    | 111.6  | 88.4  | 0.792115 | 0.0109057  |
| Q8N2U0      | TMEM256  | Transmembrane protein 256 OS=Homo sapiens GN=TMEM256 PE=3 SV=1                                                  | 31.85840708 | 2  | 7   | 2  | 113  | 11.734 | 8.94 | 123.3 | 100.1 | 93   | 83.6  | 111.7  | 88.3  | 0.79051  | 0.0102764  |
| B3KQU6      |          | cDNA PSEC0207 fis, clone HEMBA1002981, highly similar to Homo sapiens nurim (nuclear envelope membrane protein) | 19.46564885 | 4  | 5   | 4  | 262  | 29.37  | 8.63 | 124.8 | 98.7  | 86.7 | 89.8  | 111.75 | 88.25 | 0.789709 | 0.00997396 |

|        |           |                                                                                                       |             |    |     |    |     |        |       |       |       |       |       |        |       |          |            |  |
|--------|-----------|-------------------------------------------------------------------------------------------------------|-------------|----|-----|----|-----|--------|-------|-------|-------|-------|-------|--------|-------|----------|------------|--|
|        |           | (NRM), mRNA OS=Homo sapiens<br>PE=2 SV=1                                                              |             |    |     |    |     |        |       |       |       |       |       |        |       |          |            |  |
| E9PL71 | EEF1D     | Elongation factor 1-delta<br>(Fragment) OS=Homo sapiens<br>GN=EEF1D PE=1 SV=1                         | 49.73262032 | 10 | 20  | 1  | 187 | 20.806 | 5.01  | 88.8  | 135   | 72.3  | 103.9 | 111.9  | 88.1  | 0.78731  | 0.00911349 |  |
| O60248 | SOX15     | Protein SOX-15 OS=Homo sapiens<br>GN=SOX15 PE=1 SV=1                                                  | 13.30472103 | 2  | 2   | 2  | 233 | 25.236 | 9.76  | 107.8 | 116.2 | 88.8  | 87.2  | 112    | 88    | 0.785714 | 0.00857711 |  |
| Q8TAP8 | PPP1R35   | Protein phosphatase 1 regulatory subunit 35 OS=Homo sapiens<br>GN=PPP1R35 PE=1 SV=1                   | 4.347826087 | 1  | 1   | 1  | 253 | 27.936 | 8.68  | 105.6 | 118.4 | 84.7  | 91.2  | 112    | 87.95 | 0.785268 | 0.00843201 |  |
| G3V556 | C14orf2   | 6.8 kDa mitochondrial proteolipid OS=Homo sapiens GN=C14orf2<br>PE=1 SV=1                             | 12.12121212 | 1  | 6   | 1  | 99  | 11.274 | 9.16  | 141.4 | 82.7  | 92.5  | 83.4  | 112.05 | 87.95 | 0.784917 | 0.00831962 |  |
| Q96F25 | ALG14     | UDP-N-acetylglucosamine transferase subunit ALG14 homolog OS=Homo sapiens<br>GN=ALG14 PE=1 SV=1       | 6.481481481 | 1  | 1   | 1  | 216 | 24.135 | 8.94  | 100.5 | 123.6 | 74    | 101.9 | 112.05 | 87.95 | 0.784917 | 0.00831962 |  |
| Q7L0Q8 | RHOU      | Rho-related GTP-binding protein RhoU OS=Homo sapiens<br>GN=RHOU PE=1 SV=1                             | 10.46511628 | 2  | 3   | 2  | 258 | 28.2   | 8.06  | 111   | 113.3 | 93.9  | 81.8  | 112.15 | 87.85 | 0.783326 | 0.00782518 |  |
| B4E2B5 |           | MICOS complex subunit MIC60 OS=Homo sapiens PE=2 SV=1                                                 | 48.76237624 | 18 | 50  | 1  | 404 | 43.194 | 9.2   | 117.2 | 107.1 | 70.6  | 105   | 112.15 | 87.8  | 0.78288  | 0.00769131 |  |
| H7BY36 | EWSR1     | RNA-binding protein EWS (Fragment) OS=Homo sapiens<br>GN=EWSR1 PE=1 SV=1                              | 21.42857143 | 4  | 10  | 1  | 308 | 32.16  | 9.82  | 137.2 | 87.6  | 94.2  | 81.1  | 112.4  | 87.65 | 0.779804 | 0.00682046 |  |
| B2R4S9 | HIST1H2BE | Histone H2B OS=Homo sapiens<br>GN=HIST1H2BE PE=2 SV=1                                                 | 72.22222222 | 11 | 304 | 1  | 126 | 13.898 | 10.32 | 110.9 | 113.8 | 104.8 | 70.4  | 112.35 | 87.6  | 0.779706 | 0.00679418 |  |
| P16401 | HIST1H1B  | Histone H1.5 OS=Homo sapiens<br>GN=HIST1H1B PE=1 SV=3                                                 | 49.11504425 | 19 | 120 | 15 | 226 | 22.566 | 10.92 | 100.6 | 124.2 | 90    | 85.2  | 112.4  | 87.6  | 0.779359 | 0.00670187 |  |
| A4D1B1 | CD36      | CD36 antigen (Collagen type I receptor, thrombospondin receptor) OS=Homo sapiens<br>GN=CD36 PE=2 SV=1 | 1.694915254 | 1  | 1   | 1  | 472 | 53.019 | 7.96  | 99.5  | 125.3 | 81.5  | 93.6  | 112.4  | 87.55 | 0.778915 | 0.00658505 |  |

|                |              |                                                                                                  |             |    |     |    |     |        |       |       |       |      |       |        |       |              |            |
|----------------|--------------|--------------------------------------------------------------------------------------------------|-------------|----|-----|----|-----|--------|-------|-------|-------|------|-------|--------|-------|--------------|------------|
| A0A024R<br>CC6 | FRAG1        | FGF receptor activating protein 1,<br>isoform CRA_d OS=Homo sapiens<br>GN=FRAG1 PE=4 SV=1        | 3.492063492 | 1  | 1   | 1  | 315 | 36.392 | 7.9   | 104.7 | 120.2 | 77.3 | 97.8  | 112.45 | 87.55 | 0.77856<br>8 | 0.00649535 |
| P49458         | SRP9         | Signal recognition particle 9 kDa<br>protein OS=Homo sapiens<br>GN=SRP9 PE=1 SV=2                | 53.48837209 | 5  | 11  | 5  | 86  | 10.105 | 7.97  | 111.2 | 113.8 | 78.6 | 96.4  | 112.5  | 87.5  | 0.77777<br>8 | 0.00629455 |
| A0A0C4Z<br>NA2 | TRA          | TRA protein (Fragment) OS=Homo<br>sapiens GN=TRA PE=2 SV=1                                       | 5.303030303 | 1  | 1   | 1  | 132 | 14.605 | 7.08  | 105.7 | 119.4 | 81.3 | 93.6  | 112.55 | 87.45 | 0.77698<br>8 | 0.00609933 |
| P16403         | HIST1H<br>1C | Histone H1.2 OS=Homo sapiens<br>GN=HIST1H1C PE=1 SV=2                                            | 52.58215962 | 19 | 183 | 7  | 213 | 21.352 | 10.93 | 101.6 | 123.5 | 87.7 | 87.2  | 112.55 | 87.45 | 0.77698<br>8 | 0.00609933 |
| O00165         | HAX1         | HCLS1-associated protein X-1<br>OS=Homo sapiens GN=HAX1<br>PE=1 SV=2                             | 37.27598566 | 7  | 12  | 7  | 279 | 31.601 | 4.92  | 108.4 | 116.8 | 72.2 | 102.6 | 112.6  | 87.4  | 0.77619<br>9 | 0.00590954 |
| A8MTT3         | CEBPZ<br>OS  | Protein CEBPZOS OS=Homo<br>sapiens GN=CEBPZOS PE=1<br>SV=2                                       | 8.75        | 1  | 1   | 1  | 80  | 9.33   | 9.7   | 113   | 112.4 | 85.6 | 89    | 112.7  | 87.3  | 0.77462<br>3 | 0.00554582 |
| A0A0S2Z4<br>91 | NPM1         | Nucleophosmin isoform 2<br>(Fragment) OS=Homo sapiens<br>GN=NPM1 PE=2 SV=1                       | 55.10204082 | 17 | 162 | 3  | 294 | 32.555 | 4.78  | 96    | 129.5 | 85.7 | 88.8  | 112.75 | 87.25 | 0.77383<br>6 | 0.0053716  |
| P13073         | COX41        | Cytochrome c oxidase subunit 4<br>isoform 1, mitochondrial OS=Homo<br>sapiens GN=COX41 PE=1 SV=1 | 37.86982249 | 8  | 45  | 8  | 169 | 19.564 | 9.51  | 105.3 | 120.2 | 77.5 | 96.9  | 112.75 | 87.2  | 0.77339<br>2 | 0.00527554 |
| F8VS61         | KRT77        | Keratin, type II cytoskeletal 1b<br>OS=Homo sapiens GN=KRT77<br>PE=1 SV=1                        | 3.225806452 | 2  | 7   | 1  | 248 | 25.362 | 8.69  | 87.6  | 138.1 | 91.2 | 83.2  | 112.85 | 87.2  | 0.77270<br>7 | 0.00513004 |
| A0A024R6<br>44 | CLN5         | Ceroid-lipofuscinosis neuronal<br>protein 5 OS=Homo sapiens<br>GN=CLN5 PE=1 SV=1                 | 4.422604423 | 2  | 2   | 2  | 407 | 46.309 | 8.38  | 115.1 | 110.7 | 82.4 | 91.9  | 112.9  | 87.15 | 0.77192<br>2 | 0.00496768 |
| Q8WXF1         | PSPC1        | Paraspeckle component 1<br>OS=Homo sapiens GN=PSPC1<br>PE=1 SV=1                                 | 28.48948375 | 15 | 24  | 14 | 523 | 58.706 | 6.67  | 116.9 | 108.9 | 88.7 | 85.5  | 112.9  | 87.1  | 0.77147<br>9 | 0.00487809 |

|            |         |                                                                                                      |             |    |    |    |     |        |      |       |       |      |       |        |       |          |            |
|------------|---------|------------------------------------------------------------------------------------------------------|-------------|----|----|----|-----|--------|------|-------|-------|------|-------|--------|-------|----------|------------|
| P23511     | NFYA    | Nuclear transcription factor Y subunit alpha OS=Homo sapiens GN=NFYA PE=1 SV=2                       | 5.475504323 | 1  | 1  | 1  | 347 | 36.854 | 8.94 | 125.2 | 100.6 | 82.7 | 91.4  | 112.9  | 87.05 | 0.771036 | 0.00478991 |
| V9GYT7     | PSIP1   | PC4 and SFRS1-interacting protein (Fragment) OS=Homo sapiens GN=PSIP1 PE=1 SV=1                      | 26.15384615 | 1  | 1  | 1  | 65  | 7.783  | 7.52 | 114.6 | 111.3 | 85.8 | 88.3  | 112.95 | 87.05 | 0.770695 | 0.00472289 |
| A0A024R4A8 | BOK     | BCL2-related ovarian killer, isoform CRA_a OS=Homo sapiens GN=BOK PE=4 SV=1                          | 13.20754717 | 2  | 4  | 2  | 212 | 23.265 | 9.11 | 110.7 | 115.2 | 86.4 | 87.7  | 112.95 | 87.05 | 0.770695 | 0.00472289 |
| P35659     | DEK     | Protein DEK OS=Homo sapiens GN=DEK PE=1 SV=1                                                         | 36.8        | 17 | 46 | 17 | 375 | 42.648 | 8.56 | 123.4 | 102.5 | 84.6 | 89.5  | 112.95 | 87.05 | 0.770695 | 0.00472289 |
| Q8TE01     | derp12  | DERP12 (Dermal papilla derived protein 12) OS=Homo sapiens GN=derp12 PE=2 SV=1                       | 35.86005831 | 12 | 21 | 12 | 343 | 38.169 | 6.58 | 102.1 | 123.8 | 86.6 | 87.5  | 112.95 | 87.05 | 0.770695 | 0.00472289 |
| P46776     | RPL27A  | 60S ribosomal protein L27a OS=Homo sapiens GN=RPL27A PE=1 SV=2                                       | 21.62162162 | 4  | 15 | 4  | 148 | 16.551 | 11   | 113.2 | 113.1 | 63.5 | 110.2 | 113.15 | 86.85 | 0.767565 | 0.00414565 |
| Q99595     | TIMM17A | Mitochondrial import inner membrane translocase subunit Tim17-A OS=Homo sapiens GN=TIMM17A PE=1 SV=1 | 28.65497076 | 3  | 5  | 3  | 171 | 18.012 | 7.87 | 96.9  | 129.5 | 76.7 | 96.9  | 113.2  | 86.8  | 0.766784 | 0.00401166 |
| Q9NRP2     | CMC2    | COX assembly mitochondrial protein 2 homolog OS=Homo sapiens GN=CMC2 PE=1 SV=1                       | 54.43037975 | 4  | 17 | 4  | 79  | 9.454  | 7.87 | 108.9 | 117.6 | 81.7 | 91.8  | 113.25 | 86.75 | 0.766004 | 0.00388162 |
| Q92570     | NR4A3   | Nuclear receptor subfamily 4 group A member 3 OS=Homo sapiens GN=NR4A3 PE=1 SV=3                     | 1.277955272 | 1  | 1  | 1  | 626 | 68.186 | 7.81 | 113.2 | 113.6 | 91.8 | 81.4  | 113.4  | 86.6  | 0.763668 | 0.00351402 |
| Q86WA6     | BPHL    | Valacyclovir hydrolase OS=Homo sapiens GN=BPHL PE=1 SV=1                                             | 27.83505155 | 8  | 13 | 8  | 291 | 32.522 | 9.14 | 119.7 | 107.1 | 78.7 | 94.5  | 113.4  | 86.6  | 0.763668 | 0.00351402 |
| A0A024R1X0 | CASC3   | Cancer susceptibility candidate 3, isoform CRA_a OS=Homo sapiens GN=CASC3 PE=4 SV=1                  | 1.214574899 | 1  | 1  | 1  | 741 | 80.426 | 7.17 | 94.6  | 132.3 | 78.6 | 94.5  | 113.45 | 86.55 | 0.762891 | 0.00339868 |

|            |          |                                                                                                                             |             |    |     |   |      |         |       |       |       |      |      |        |       |          |            |
|------------|----------|-----------------------------------------------------------------------------------------------------------------------------|-------------|----|-----|---|------|---------|-------|-------|-------|------|------|--------|-------|----------|------------|
| O95562     | SFT2D2   | Vesicle transport protein SFT2B<br>OS=Homo sapiens GN=SFT2D2<br>PE=1 SV=1                                                   | 17.5        | 2  | 5   | 2 | 160  | 17.767  | 9.13  | 107.9 | 119.3 | 84.7 | 88.2 | 113.6  | 86.45 | 0.761003 | 0.00313235 |
| Q8WV99     | ZFAND2B  | AN1-type zinc finger protein 2B<br>OS=Homo sapiens GN=ZFAND2B<br>PE=1 SV=1                                                  | 9.338521401 | 1  | 1   | 1 | 257  | 28.004  | 6.92  | 117.6 | 109.6 | 86.1 | 86.7 | 113.6  | 86.4  | 0.760563 | 0.00307296 |
| A8K8Q0     |          | cDNA FLJ78753, highly similar to<br>Homo sapiens zinc fingers and<br>homeoboxes 3 (ZHX3), mRNA<br>OS=Homo sapiens PE=2 SV=1 | 2.30125523  | 1  | 1   | 1 | 956  | 104.618 | 6.07  | 134.4 | 93    | 72.8 | 99.8 | 113.7  | 86.3  | 0.759015 | 0.00287184 |
| A0A024R118 | METTL7A  | Methyltransferase like 7A, isoform<br>CRA_a OS=Homo sapiens<br>GN=METTL7A PE=4 SV=1                                         | 22.13114754 | 4  | 11  | 4 | 244  | 28.301  | 8.38  | 113.3 | 114.1 | 95.6 | 77   | 113.7  | 86.3  | 0.759015 | 0.00287184 |
| Q9P2N2     | ARHGA28  | Rho GTPase-activating protein 28<br>OS=Homo sapiens<br>GN=ARHGAP28 PE=1 SV=3                                                | 1.09739369  | 1  | 1   | 1 | 729  | 82.008  | 7.75  | 110.8 | 116.9 | 84   | 88.2 | 113.85 | 86.1  | 0.756258 | 0.00254239 |
| E7ETY2     | TCOF1    | Treacle protein OS=Homo sapiens<br>GN=TCOF1 PE=1 SV=1                                                                       | 26.74731183 | 35 | 55  | 2 | 1488 | 152.213 | 8.85  | 115.6 | 112.6 | 74.8 | 97.1 | 114.1  | 85.95 | 0.753287 | 0.00222513 |
| B4E1H4     |          | cDNA FLJ54226, highly similar to<br>Transmembrane protein 9<br>OS=Homo sapiens PE=2 SV=1                                    | 6.25        | 1  | 1   | 1 | 208  | 23.372  | 6.7   | 108.9 | 119.3 | 77.9 | 93.9 | 114.1  | 85.9  | 0.752848 | 0.00218144 |
| A0A024R2L0 | UBP1     | Upstream binding protein 1 (LBP-1a), isoform CRA_a OS=Homo sapiens<br>GN=UBP1 PE=4 SV=1                                     | 2.592592593 | 1  | 1   | 1 | 540  | 60.453  | 6.35  | 95.6  | 132.6 | 81.2 | 90.6 | 114.1  | 85.9  | 0.752848 | 0.00218144 |
| A3R0T8     | HIST1H1E | Histone 1, H1e OS=Homo sapiens<br>GN=HIST1H1E PE=2 SV=1                                                                     | 50.2283105  | 18 | 150 | 6 | 219  | 21.852  | 11.03 | 96.6  | 131.8 | 84.9 | 86.7 | 114.2  | 85.8  | 0.751314 | 0.00203438 |
| A0A024RBH7 | TMPO     | Thymopoietin, isoform CRA_a<br>OS=Homo sapiens GN=TMPO<br>PE=4 SV=1                                                         | 51.30434783 | 14 | 65  | 2 | 345  | 38.714  | 9.16  | 107.5 | 121.1 | 79.1 | 92.4 | 114.3  | 85.75 | 0.750219 | 0.00193493 |
| P11474     | ESRRA    | Steroid hormone receptor ERR1<br>OS=Homo sapiens GN=ESRRA<br>PE=1 SV=3                                                      | 3.073286052 | 1  | 1   | 1 | 423  | 45.481  | 6.38  | 129.8 | 99.1  | 77.2 | 93.9 | 114.45 | 85.55 | 0.747488 | 0.00170545 |



|                |                       |                                                                                                               |             |    |    |   |      |         |      |       |       |      |       |        |       |              |             |
|----------------|-----------------------|---------------------------------------------------------------------------------------------------------------|-------------|----|----|---|------|---------|------|-------|-------|------|-------|--------|-------|--------------|-------------|
| A0A0S2Z3<br>H3 | SLC25A<br>4           | Solute carrier family 25 member 4<br>isoform 1 (Fragment) OS=Homo<br>sapiens GN=SLC25A4 PE=2 SV=1             | 47.65100671 | 17 | 71 | 4 | 298  | 33.043  | 9.76 | 122.4 | 106.7 | 73.7 | 97.1  | 114.55 | 85.4  | 0.74552<br>6 | 0.00155589  |
| P39059         | COL15A<br>1           | Collagen alpha-1(XV) chain<br>OS=Homo sapiens GN=COL15A1<br>PE=1 SV=2                                         | 5.403458213 | 6  | 6  | 6 | 1388 | 141.632 | 5    | 118.1 | 111.1 | 88.7 | 82.1  | 114.6  | 85.4  | 0.74520<br>1 | 0.00153225  |
| A0A024R4<br>Z1 | hCG_20<br>42749       | HCG2042749, isoform CRA_b<br>OS=Homo sapiens<br>GN=hCG_2042749 PE=4 SV=1                                      | 1.578947368 | 1  | 1  | 1 | 570  | 63.406  | 7.36 | 122.2 | 107   | 89.7 | 81.1  | 114.6  | 85.4  | 0.74520<br>1 | 0.00153225  |
| Q68D09         | DKFZp6<br>86D196<br>8 | Putative uncharacterized protein<br>DKFZp686D1968 (Fragment)<br>OS=Homo sapiens<br>GN=DKFZp686D1968 PE=2 SV=1 | 10.69518717 | 6  | 11 | 1 | 561  | 62.203  | 6.73 | 110.1 | 119.2 | 90.5 | 80.2  | 114.65 | 85.35 | 0.74444      | 0.00147821  |
| Q6VMQ6         | ATF7IP                | Activating transcription factor 7-<br>interacting protein 1 OS=Homo<br>sapiens GN=ATF7IP PE=1 SV=3            | 0.866141732 | 1  | 1  | 1 | 1270 | 136.31  | 4.7  | 149   | 80.4  | 87.6 | 82.9  | 114.7  | 85.25 | 0.74324<br>3 | 0.00139668  |
| A8MWD9         | SNRPG<br>P15          | Putative small nuclear<br>ribonucleoprotein G-like protein 15<br>OS=Homo sapiens<br>GN=SNRPGP15 PE=5 SV=2     | 25          | 2  | 13 | 2 | 76   | 8.538   | 8.84 | 122.1 | 107.6 | 61.9 | 108.3 | 114.85 | 85.1  | 0.74096<br>6 | 0.00125257  |
| A0A0G2J<br>NU3 | BDP1                  | Transcription factor TFIIIB<br>component B'' homolog OS=Homo<br>sapiens GN=BDP1 PE=1 SV=1                     | 0.952743902 | 1  | 1  | 1 | 2624 | 293.719 | 5.11 | 137.3 | 92.7  | 89.6 | 80.4  | 115    | 85    | 0.73913      | 0.0011462   |
| B4E0X1         |                       | Beta-2-microglobulin OS=Homo<br>sapiens PE=2 SV=1                                                             | 34.42622951 | 3  | 14 | 3 | 122  | 13.937  | 7.44 | 100.4 | 130.1 | 53   | 116.6 | 115.25 | 84.8  | 0.73579<br>2 | 0.000973334 |
| Q7Z7H8         | MRPL10                | 39S ribosomal protein L10,<br>mitochondrial OS=Homo sapiens<br>GN=MRPL10 PE=1 SV=3                            | 26.43678161 | 4  | 6  | 4 | 261  | 29.264  | 9.58 | 151.7 | 78.9  | 85.9 | 83.5  | 115.3  | 84.7  | 0.73460<br>5 | 0.000917795 |
| A0A059Q<br>FD5 | COX2                  | Cytochrome c oxidase subunit 2<br>OS=Homo sapiens GN=COX2<br>PE=3 SV=1                                        | 18.94273128 | 4  | 16 | 1 | 227  | 25.625  | 4.84 | 141.6 | 89.1  | 86.1 | 83.2  | 115.35 | 84.65 | 0.73385<br>3 | 0.000884087 |
| U3KQK5         |                       | Uncharacterized protein OS=Homo<br>sapiens PE=4 SV=1                                                          | 5.487804878 | 1  | 8  | 1 | 164  | 17.002  | 10.8 | 107.3 | 123.5 | 64.1 | 105.2 | 115.4  | 84.65 | 0.73353<br>6 | 0.000870173 |

|            |           |                                                                                                       |             |    |     |   |     |        |       |       |       |      |      |        |       |              |             |
|------------|-----------|-------------------------------------------------------------------------------------------------------|-------------|----|-----|---|-----|--------|-------|-------|-------|------|------|--------|-------|--------------|-------------|
| A8K9F5     |           | cDNA FLJ77771, highly similar to Homo sapiens replication initiator 1, mRNA OS=Homo sapiens PE=2 SV=1 | 12.52204586 | 5  | 6   | 5 | 567 | 63.576 | 9.98  | 114.6 | 116.4 | 73.9 | 95.2 | 115.5  | 84.55 | 0.73203<br>5 | 0.000807109 |
| P25490     | YY1       | Transcriptional repressor protein YY1 OS=Homo sapiens GN=YY1 PE=1 SV=2                                | 27.53623188 | 9  | 10  | 9 | 414 | 44.685 | 6.25  | 114.9 | 116.1 | 69.1 | 99.9 | 115.5  | 84.5  | 0.73160<br>2 | 0.0007897   |
| F1D8R0     | NR2F2     | Nuclear receptor subfamily 2, group F, member 2, isoform CRA_a OS=Homo sapiens GN=NR2F2 PE=2 SV=1     | 13.04347826 | 5  | 5   | 1 | 414 | 45.542 | 8.28  | 104.3 | 126.7 | 85.9 | 83.1 | 115.5  | 84.5  | 0.73160<br>2 | 0.0007897   |
| Q9NX76     | CMTM6     | CKLF-like MARVEL transmembrane domain-containing protein 6 OS=Homo sapiens GN=CMTM6 PE=1 SV=1         | 5.464480874 | 1  | 1   | 1 | 183 | 20.406 | 5.29  | 109.4 | 121.7 | 85.5 | 83.5 | 115.55 | 84.5  | 0.73128<br>5 | 0.000777186 |
| B7Z213     |           | cDNA FLJ50130, highly similar to Heterogeneous nuclear ribonucleoprotein Q OS=Homo sapiens PE=2 SV=1  | 33.203125   | 7  | 20  | 2 | 256 | 28.561 | 9.17  | 104.6 | 126.6 | 84.6 | 84.3 | 115.6  | 84.45 | 0.73053<br>6 | 0.000748291 |
| Q86V81     | ALYREF    | THO complex subunit 4 OS=Homo sapiens GN=ALYREF PE=1 SV=3                                             | 43.19066148 | 9  | 38  | 1 | 257 | 26.872 | 11.15 | 72    | 159.3 | 79.3 | 89.5 | 115.65 | 84.4  | 0.72978<br>8 | 0.00072039  |
| Q02086     | SP2       | Transcription factor Sp2 OS=Homo sapiens GN=SP2 PE=1 SV=3                                             | 2.610114192 | 1  | 1   | 1 | 613 | 64.86  | 9.92  | 110.6 | 121.1 | 85   | 83.4 | 115.85 | 84.2  | 0.72680<br>2 | 0.000618142 |
| P68431     | HIST1H3A  | Histone H3.1 OS=Homo sapiens GN=HIST1H3A PE=1 SV=2                                                    | 55.88235294 | 8  | 96  | 1 | 136 | 15.394 | 11.12 | 123.5 | 108.3 | 85.1 | 83.2 | 115.9  | 84.15 | 0.72605<br>7 | 0.000594771 |
| A0A024QZZ7 | HIST1H2BD | Histone H2B OS=Homo sapiens GN=HIST1H2BD PE=3 SV=1                                                    | 72.22222222 | 11 | 301 | 1 | 126 | 13.928 | 10.32 | 116.2 | 115.6 | 96.4 | 71.7 | 115.9  | 84.05 | 0.72519<br>4 | 0.000568705 |
| Q9HD51     |           | Uncharacterized gastric protein YC12P (Fragment) OS=Homo sapiens PE=2 SV=1                            | 19.04761905 | 1  | 1   | 1 | 84  | 9.609  | 8.1   | 147   | 85.3  | 82   | 85.7 | 116.15 | 83.85 | 0.72191<br>1 | 0.000478701 |
| A0A024R0B8 | FLJ21657  | Uncharacterized protein OS=Homo sapiens GN=FLJ21657 PE=4 SV=1                                         | 6.511627907 | 1  | 1   | 1 | 215 | 24.201 | 8.59  | 144.4 | 88.1  | 83.6 | 83.8 | 116.25 | 83.7  | 0.72         | 0.000432453 |

|        |            |                                                                                                                                      |             |    |    |    |      |         |       |       |       |      |       |        |       |              |             |
|--------|------------|--------------------------------------------------------------------------------------------------------------------------------------|-------------|----|----|----|------|---------|-------|-------|-------|------|-------|--------|-------|--------------|-------------|
| Q9Y623 | MYH4       | Myosin-4 OS=Homo sapiens<br>GN=MYH4 PE=1 SV=2                                                                                        | 1.031459515 | 2  | 2  | 1  | 1939 | 222.932 | 5.85  | 101.5 | 131.1 | 79.2 | 88.2  | 116.3  | 83.7  | 0.71969      | 0.000425356 |
| O43715 | TRIAP1     | TP53-regulated inhibitor of<br>apoptosis 1 OS=Homo sapiens<br>GN=TRIAP1 PE=1 SV=1                                                    | 10.52631579 | 1  | 1  | 1  | 76   | 8.78    | 5.48  | 113.4 | 119.4 | 82.6 | 84.6  | 116.4  | 83.6  | 0.71821<br>3 | 0.000392922 |
| O75298 | RTN2       | Reticulon-2 OS=Homo sapiens<br>GN=RTN2 PE=1 SV=1                                                                                     | 3.302752294 | 1  | 1  | 1  | 545  | 59.228  | 5.31  | 127.2 | 105.8 | 74   | 93    | 116.5  | 83.5  | 0.71673<br>8 | 0.0003628   |
| I3L0U2 | PRSS21     | Testisin (Fragment) OS=Homo<br>sapiens GN=PRSS21 PE=1 SV=1                                                                           | 36.69724771 | 7  | 11 | 1  | 218  | 24.8    | 8.31  | 170.7 | 62.5  | 79.5 | 87.3  | 116.6  | 83.4  | 0.71526<br>6 | 0.000334839 |
| P07305 | H1F0       | Histone H1.0 OS=Homo sapiens<br>GN=H1F0 PE=1 SV=3                                                                                    | 36.08247423 | 10 | 27 | 10 | 194  | 20.85   | 10.84 | 106.6 | 127   | 78.7 | 87.7  | 116.8  | 83.2  | 0.71232<br>9 | 0.000284837 |
| J3KPT4 | TRABD      | TraB domain-containing protein<br>OS=Homo sapiens GN=TRABD<br>PE=1 SV=1                                                              | 10.55408971 | 3  | 7  | 3  | 379  | 42.665  | 8     | 121   | 112.7 | 61   | 105.2 | 116.85 | 83.1  | 0.71116<br>8 | 0.00026703  |
| HOY322 | LIN9       | Protein lin-9 homolog (Fragment)<br>OS=Homo sapiens GN=LIN9<br>PE=1 SV=1                                                             | 1.794453507 | 1  | 1  | 1  | 613  | 69.705  | 9.7   | 87.7  | 146.1 | 75.9 | 90.3  | 116.9  | 83.1  | 0.71086<br>4 | 0.000262535 |
| Q59H39 |            | Signal transducer and activator of<br>transcription (Fragment)<br>OS=Homo sapiens PE=2 SV=1                                          | 8.121827411 | 5  | 6  | 2  | 788  | 89.91   | 6.2   | 110.8 | 123.1 | 82.5 | 83.6  | 116.95 | 83.05 | 0.71013<br>3 | 0.000252005 |
| P42568 | MLLT3      | Protein AF-9 OS=Homo sapiens<br>GN=MLLT3 PE=1 SV=2                                                                                   | 7.570422535 | 4  | 4  | 4  | 568  | 63.313  | 8.63  | 108.8 | 125.6 | 85.1 | 80.4  | 117.2  | 82.75 | 0.70605<br>8 | 0.000200082 |
| Q5TD94 | RSPH4A     | Radial spoke head protein 4<br>homolog A OS=Homo sapiens<br>GN=RSPH4A PE=1 SV=1                                                      | 5.30726257  | 1  | 2  | 1  | 716  | 80.684  | 4.44  | 131.4 | 103.7 | 74.4 | 90.5  | 117.55 | 82.45 | 0.70140<br>4 | 0.000152857 |
| B3KRJ9 |            | cDNA FLJ34439 fis, clone<br>HLUNG2001146, highly similar to<br>Splicing factor, arginine/serine-rich<br>12 OS=Homo sapiens PE=2 SV=1 | 9.53307393  | 4  | 6  | 1  | 514  | 58.167  | 9.92  | 121.1 | 114.5 | 83.9 | 80.5  | 117.8  | 82.2  | 0.69779<br>3 | 0.000123521 |
| Q86X19 | TMEM1<br>7 | Transmembrane protein 17<br>OS=Homo sapiens GN=TMEM17<br>PE=1 SV=2                                                                   | 4.04040404  | 1  | 1  | 1  | 198  | 23.031  | 6.79  | 110.3 | 125.4 | 51.5 | 112.8 | 117.85 | 82.15 | 0.69707<br>3 | 0.000118327 |

|            |          |                                                                                                      |             |    |     |    |      |         |       |       |       |      |       |        |       |          |          |
|------------|----------|------------------------------------------------------------------------------------------------------|-------------|----|-----|----|------|---------|-------|-------|-------|------|-------|--------|-------|----------|----------|
| B9TX04     | MED16    | Mediator complex subunit MED16 variant MED16_i11 (Fragment)<br>OS=Homo sapiens GN=MED16<br>PE=2 SV=1 | 18.18181818 | 2  | 2   | 1  | 165  | 18.648  | 7.87  | 130   | 106.2 | 89   | 74.8  | 118.1  | 81.9  | 0.69348  | 9.53E-05 |
| A0A024R608 | RPLP1    | Ribosomal protein, large, P1, isoform CRA_a OS=Homo sapiens<br>GN=RPLP1 PE=3 SV=1                    | 28.94736842 | 2  | 7   | 1  | 114  | 11.507  | 4.32  | 144.7 | 92.2  | 81.4 | 81.7  | 118.45 | 81.55 | 0.688476 | 7.00E-05 |
| Q96ET8     | TVP23C   | Golgi apparatus membrane protein TVP23 homolog C OS=Homo sapiens<br>GN=TVP23C PE=1 SV=3              | 12.68115942 | 2  | 4   | 2  | 276  | 31.085  | 9.29  | 121.9 | 115.5 | 46.3 | 116.3 | 118.7  | 81.3  | 0.68492  | 5.60E-05 |
| Q3MIH3     | UBA52    | Ubiquitin A-52 residue ribosomal protein fusion product 1 OS=Homo sapiens<br>GN=UBA52 PE=2 SV=1      | 45.3125     | 7  | 112 | 2  | 128  | 14.719  | 9.83  | 105.5 | 132.8 | 62.8 | 99    | 119.15 | 80.9  | 0.678976 | 3.82E-05 |
| Q96HP0     | DOCK6    | Dedicator of cytokinesis protein 6 OS=Homo sapiens<br>GN=DOCK6 PE=1 SV=3                             | 0.537371764 | 1  | 1   | 1  | 2047 | 229.414 | 6.74  | 112.2 | 126.5 | 82.2 | 79.2  | 119.35 | 80.7  | 0.676163 | 3.18E-05 |
| A0A087WYC6 | DNAH11   | Dynein heavy chain 11, axonemal OS=Homo sapiens<br>GN=DNAH11 PE=1 SV=1                               | 0.154764537 | 1  | 1   | 1  | 4523 | 520.724 | 6.44  | 95.3  | 144   | 79.1 | 81.7  | 119.65 | 80.4  | 0.67196  | 2.40E-05 |
| Q6N075     | MFSD5    | Molybdate-anion transporter OS=Homo sapiens<br>GN=MFSD5 PE=1 SV=2                                    | 6.444444444 | 2  | 3   | 2  | 450  | 49.732  | 7.8   | 162.4 | 77.1  | 77.6 | 82.9  | 119.75 | 80.25 | 0.670146 | 2.12E-05 |
| O60303     | KIAA0556 | Protein KIAA0556 OS=Homo sapiens<br>GN=KIAA0556 PE=1 SV=4                                            | 0.43263288  | 1  | 1   | 1  | 1618 | 180.806 | 5.87  | 110   | 130.1 | 77   | 82.9  | 120.05 | 79.95 | 0.665973 | 1.59E-05 |
| A8K517     | RPS23    | Ribosomal protein S23, isoform CRA_a OS=Homo sapiens<br>GN=RPS23 PE=2 SV=1                           | 22.37762238 | 5  | 25  | 5  | 143  | 15.798  | 10.49 | 110.2 | 130.3 | 47.7 | 111.9 | 120.25 | 79.8  | 0.663617 | 1.35E-05 |
| A0A024R4A2 | ALPI     | Alkaline phosphatase OS=Homo sapiens<br>GN=ALPI PE=3 SV=1                                            | 46.21212121 | 18 | 146 | 14 | 528  | 56.776  | 5.86  | 126.8 | 113.8 | 84.8 | 74.6  | 120.3  | 79.7  | 0.66251  | 1.25E-05 |
| P12532     | CKMT1A   | Creatine kinase U-type, mitochondrial OS=Homo sapiens<br>GN=CKMT1A PE=1 SV=1                         | 2.398081535 | 1  | 1   | 1  | 417  | 47.007  | 8.34  | 135.5 | 106.4 | 82.3 | 75.8  | 120.95 | 79.05 | 0.653576 | 6.58E-06 |

|        |        |                                                                                                                                                                             |             |    |    |   |     |        |      |       |       |      |       |        |       |          |          |
|--------|--------|-----------------------------------------------------------------------------------------------------------------------------------------------------------------------------|-------------|----|----|---|-----|--------|------|-------|-------|------|-------|--------|-------|----------|----------|
| B4DZC6 |        | cDNA FLJ60989, highly similar to Bardet-Biedl syndrome 5 protein OS=Homo sapiens PE=2 SV=1                                                                                  | 2.573529412 | 2  | 2  | 1 | 544 | 60.952 | 6.64 | 107.6 | 137.3 | 77.7 | 77.5  | 122.45 | 77.6  | 0.633728 | 1.43E-06 |
| Q71MF9 | FP6679 | Putative uncharacterized protein FP6679 OS=Homo sapiens GN=FP6679 PE=2 SV=1                                                                                                 | 7.446808511 | 1  | 1  | 1 | 94  | 10.827 | 9.51 | 116.3 | 128.7 | 76.4 | 78.6  | 122.5  | 77.5  | 0.632653 | 1.31E-06 |
| Q9P0M6 | H2AFY2 | Core histone macro-H2A.2 OS=Homo sapiens GN=H2AFY2 PE=1 SV=3                                                                                                                | 9.139784946 | 3  | 14 | 1 | 372 | 40.033 | 9.69 | 131.3 | 114.6 | 40.1 | 114   | 122.95 | 77.05 | 0.626678 | 7.99E-07 |
| O43506 | ADAM20 | Disintegrin and metalloproteinase domain-containing protein 20 OS=Homo sapiens GN=ADAM20 PE=2 SV=2                                                                          | 4.958677686 | 1  | 1  | 1 | 726 | 81.548 | 6.48 | 152.9 | 94.4  | 79.3 | 73.4  | 123.65 | 76.35 | 0.617469 | 3.65E-07 |
| Q92482 | AQP3   | Aquaporin-3 OS=Homo sapiens GN=AQP3 PE=2 SV=2                                                                                                                               | 2.739726027 | 1  | 1  | 1 | 292 | 31.523 | 7.23 | 103.9 | 143.5 | 74.2 | 78.5  | 123.7  | 76.35 | 0.617219 | 3.57E-07 |
| Q05CW7 | NAT10  | <b>NAT10 protein (Fragment)</b><br>OS=Homo sapiens GN=NAT10 PE=2 SV=1                                                                                                       | 28.70036101 | 14 | 21 | 1 | 554 | 62.345 | 9.26 | 119.9 | 127.6 | 49.5 | 103.1 | 123.75 | 76.3  | 0.616566 | 3.37E-07 |
| B4DJS6 |        | cDNA FLJ51221, highly similar to Ubiquitin-protein ligase RMA1 (EC 6.3.2.-) OS=Homo sapiens PE=2 SV=1                                                                       | 4.945054945 | 1  | 1  | 1 | 182 | 20.241 | 8.21 | 115.5 | 134.4 | 78.4 | 71.7  | 124.95 | 75.05 | 0.60064  | 7.94E-08 |
| B2R6H6 |        | cDNA, FLJ92954, highly similar to Homo sapiens TAF9-like RNA polymerase II, TATA box binding protein (TBP)-associated factor, 31kDa (TAF9L), mRNA OS=Homo sapiens PE=2 SV=1 | 11.55378486 | 3  | 3  | 1 | 251 | 27.572 | 9.55 | 122.4 | 127.9 | 75.7 | 74    | 125.15 | 74.85 | 0.598082 | 6.23E-08 |
| Q6XD76 | ASCL4  | Achaete-scute homolog 4 OS=Homo sapiens GN=ASCL4 PE=1 SV=1                                                                                                                  | 4.651162791 | 1  | 2  | 1 | 172 | 19.241 | 9.03 | 124.7 | 127.1 | 77.4 | 70.8  | 125.9  | 74.1  | 0.588562 | 2.47E-08 |

|            |          |                                                                                                                                      |             |   |     |   |     |        |       |       |       |      |       |        |       |          |           |
|------------|----------|--------------------------------------------------------------------------------------------------------------------------------------|-------------|---|-----|---|-----|--------|-------|-------|-------|------|-------|--------|-------|----------|-----------|
| Q9Y2D2     | SLC35A3  | UDP-N-acetylglucosamine transporter OS=Homo sapiens GN=SLC35A3 PE=1 SV=1                                                             | 4.615384615 | 1 | 1   | 1 | 325 | 35.961 | 9.16  | 122.6 | 131.1 | 35.6 | 110.8 | 126.85 | 73.2  | 0.57706  | 7.60E-09  |
| L0R6G9     | FUNDC2   | Alternative protein FUNDC2 OS=Homo sapiens GN=FUNDC2 PE=4 SV=1                                                                       | 14.49275362 | 1 | 2   | 1 | 69  | 7.963  | 6.49  | 151.5 | 103.7 | 69.7 | 75    | 127.6  | 72.35 | 0.567006 | 2.58E-09  |
| P30536     | TSPO     | Translocator protein OS=Homo sapiens GN=TSPO PE=1 SV=3                                                                               | 4.733727811 | 1 | 4   | 1 | 169 | 18.816 | 9.36  | 122.3 | 134.8 | 30.3 | 112.5 | 128.55 | 71.4  | 0.555426 | 6.97E-10  |
| B2R5B3     |          | Histone H2A OS=Homo sapiens PE=2 SV=1                                                                                                | 40.76923077 | 6 | 105 | 2 | 130 | 14.102 | 11.06 | 96.5  | 163.5 | 70.4 | 69.6  | 130    | 70    | 0.538462 | 8.98E-11  |
| B2RB90     |          | cDNA, FLJ95375, highly similar to Homo sapiens glutamine-fructose-6-phosphate transaminase 2 (GFPT2), mRNA OS=Homo sapiens PE=2 SV=1 | 9.090909091 | 5 | 6   | 1 | 682 | 76.91  | 7.25  | 117.7 | 142.7 | 77.1 | 62.5  | 130.2  | 69.8  | 0.536098 | 6.66E-11  |
| Q16466     |          | Non-histone chromosomal protein (Fragment) OS=Homo sapiens PE=2 SV=1                                                                 | 47.70642202 | 6 | 19  | 1 | 109 | 12.563 | 9.76  | 157.2 | 104.8 | 37.3 | 100.7 | 131    | 69    | 0.526718 | 1.97E-11  |
| Q4G010     | CCSMS T1 | Protein CCSMST1 OS=Homo sapiens GN=CCSMST1 PE=2 SV=1                                                                                 | 15.90909091 | 1 | 1   | 1 | 132 | 14.994 | 7.02  | 133.1 | 132.2 | 30.4 | 104.3 | 132.65 | 67.35 | 0.507727 | 1.41E-12  |
| Q9HC85     | MB2      | Metastasis related protein (Fragment) OS=Homo sapiens GN=MB2 PE=2 SV=1                                                               | 28.26086957 | 2 | 3   | 2 | 92  | 10.414 | 5.48  | 123.1 | 153   | 67.7 | 56.1  | 138.05 | 61.9  | 0.448388 | 6.79E-17  |
| Q6ZRZ8     |          | cDNA FLJ45949 fis, clone PLACE7007973 OS=Homo sapiens PE=2 SV=1                                                                      | 1.449275362 | 1 | 1   | 1 | 483 | 54.35  | 8.38  | 161.1 | 122.8 | 63.9 | 52.2  | 141.95 | 58.05 | 0.408947 | 1.55E-20  |
| A0A126GW78 | OR5AC2   | Olfactory receptor OS=Homo sapiens GN=OR5AC2 PE=3 SV=1                                                                               | 2.265372168 | 1 | 1   | 1 | 309 | 35.263 | 8.94  | 148.1 | 163.3 | 44.6 | 43.9  | 155.7  | 44.25 | 0.2842   | 1.19E-38  |
| E9PR30     | FAU      | 40S ribosomal protein S30 OS=Homo sapiens GN=FAU PE=1 SV=1                                                                           | 10.20408163 | 1 | 1   | 1 | 98  | 10.898 | 11.56 | 117.6 | 99.9  | 90.3 | 92.1  | 108.75 | 91.2  | 0.838621 | 0.0495635 |

|            |         |                                                                                                           |             |    |     |    |     |        |      |       |       |      |      |        |       |          |           |
|------------|---------|-----------------------------------------------------------------------------------------------------------|-------------|----|-----|----|-----|--------|------|-------|-------|------|------|--------|-------|----------|-----------|
| P78545     | ELF3    | ETS-related transcription factor Elf-3 OS=Homo sapiens GN=ELF3 PE=1 SV=1                                  | 7.277628032 | 2  | 2   | 2  | 371 | 41.428 | 5.77 | 111.9 | 105.6 | 91.3 | 91.1 | 108.75 | 91.2  | 0.838621 | 0.0495635 |
| P23246     | SFPQ    | Splicing factor, proline- and glutamine-rich OS=Homo sapiens GN=SFPQ PE=1 SV=2                            | 44.83734088 | 27 | 104 | 26 | 707 | 76.102 | 9.44 | 108.2 | 109.4 | 87.3 | 95.1 | 108.8  | 91.2  | 0.838235 | 0.0490219 |
| B7Z537     |         | cDNA FLJ59580, highly similar to Cell division protein kinase 10 (EC 2.7.11.22) OS=Homo sapiens PE=2 SV=1 | 1.813471503 | 1  | 1   | 1  | 386 | 43.793 | 8.95 | 111.7 | 106   | 93.5 | 88.9 | 108.85 | 91.2  | 0.83785  | 0.0484856 |
| Q9H9L3     | ISG20L2 | Interferon-stimulated 20 kDa exonuclease-like 2 OS=Homo sapiens GN=ISG20L2 PE=1 SV=1                      | 12.74787535 | 4  | 5   | 4  | 353 | 39.13  | 9.94 | 105.3 | 112.4 | 84.9 | 97.5 | 108.85 | 91.2  | 0.83785  | 0.0484856 |
| Q86YS6     | RAB43   | Ras-related protein Rab-43 OS=Homo sapiens GN=RAB43 PE=1 SV=1                                             | 20.28301887 | 3  | 5   | 2  | 212 | 23.325 | 5.64 | 91    | 126.7 | 91.4 | 91   | 108.85 | 91.2  | 0.83785  | 0.0484856 |
| P54709     | ATP1B3  | Sodium/potassium-transporting ATPase subunit beta-3 OS=Homo sapiens GN=ATP1B3 PE=1 SV=1                   | 48.74551971 | 12 | 53  | 12 | 279 | 31.492 | 8.35 | 111.6 | 106   | 97.2 | 85.1 | 108.8  | 91.15 | 0.837776 | 0.0483822 |
| Q9P0B6     | CCDC167 | Coiled-coil domain-containing protein 167 OS=Homo sapiens GN=CCDC167 PE=1 SV=2                            | 15.46391753 | 1  | 2   | 1  | 97  | 11.452 | 9.5  | 112.3 | 105.4 | 89.9 | 92.4 | 108.85 | 91.15 | 0.837391 | 0.0478518 |
| O75340     | PDCD6   | Programmed cell death protein 6 OS=Homo sapiens GN=PDCD6 PE=1 SV=1                                        | 50.78534031 | 10 | 38  | 10 | 191 | 21.855 | 5.4  | 105.4 | 112.3 | 89   | 93.3 | 108.85 | 91.15 | 0.837391 | 0.0478518 |
| A0A024R0Z5 | TEGT    | Testis enhanced gene transcript (BAX inhibitor 1), isoform CRA_a OS=Homo sapiens GN=TEGT PE=3 SV=1        | 3.797468354 | 2  | 3   | 2  | 237 | 26.52  | 8.54 | 109.7 | 108   | 98.2 | 84   | 108.85 | 91.1  | 0.836932 | 0.0472247 |
| A6NFM0     | POLR2J2 | DNA-directed RNA polymerase II subunit RPB11-b1 OS=Homo sapiens GN=POLR2J2 PE=1 SV=1                      | 26.58227848 | 3  | 4   | 3  | 158 | 17.193 | 5.82 | 121.8 | 96    | 88.1 | 94.1 | 108.9  | 91.1  | 0.836547 | 0.0467052 |

|                |             |                                                                                                                                                  |             |    |     |    |      |         |      |       |       |      |       |        |       |              |           |
|----------------|-------------|--------------------------------------------------------------------------------------------------------------------------------------------------|-------------|----|-----|----|------|---------|------|-------|-------|------|-------|--------|-------|--------------|-----------|
| E7EQY1         | FAM136<br>A | Protein FAM136A OS=Homo sapiens GN=FAM136A PE=1 SV=1                                                                                             | 17.55102041 | 4  | 7   | 4  | 245  | 26.758  | 8.24 | 108.1 | 109.7 | 88.2 | 94    | 108.9  | 91.1  | 0.83654<br>7 | 0.0467052 |
| P32189         | GK          | Glycerol kinase OS=Homo sapiens GN=GK PE=1 SV=3                                                                                                  | 28.80143113 | 14 | 17  | 14 | 559  | 61.205  | 6.54 | 108   | 109.8 | 92.3 | 89.9  | 108.9  | 91.1  | 0.83654<br>7 | 0.0467052 |
| Q06787         | FMR1        | Synaptic functional regulator FMR1 OS=Homo sapiens GN=FMR1 PE=1 SV=1                                                                             | 16.13924051 | 8  | 14  | 5  | 632  | 71.131  | 7.42 | 107.3 | 110.5 | 81.6 | 100.6 | 108.9  | 91.1  | 0.83654<br>7 | 0.0467052 |
| A0A1B0G<br>UR5 | CHRNA<br>7  | Neuronal acetylcholine receptor subunit alpha-7 (Fragment) OS=Homo sapiens GN=CHRNA7 PE=4 SV=1                                                   | 15.58441558 | 1  | 1   | 1  | 231  | 26.058  | 8.22 | 127.9 | 90    | 96.8 | 85.3  | 108.95 | 91.05 | 0.83570<br>4 | 0.0455816 |
| Q9GZN2         | TGIF2       | Homeobox protein TGIF2 OS=Homo sapiens GN=TGIF2 PE=1 SV=1                                                                                        | 7.172995781 | 1  | 1   | 1  | 237  | 25.862  | 7.99 | 121   | 96.9  | 98.1 | 84    | 108.95 | 91.05 | 0.83570<br>4 | 0.0455816 |
| Q53H12         | AGK         | Acylglycerol kinase, mitochondrial OS=Homo sapiens GN=AGK PE=1 SV=2                                                                              | 37.44075829 | 14 | 28  | 14 | 422  | 47.107  | 8.09 | 109.4 | 108.6 | 82.9 | 99.1  | 109    | 91    | 0.83486<br>2 | 0.0444809 |
| A4D0S4         | LAMB4       | Laminin subunit beta-4 OS=Homo sapiens GN=LAMB4 PE=2 SV=1                                                                                        | 0.567859171 | 1  | 1   | 1  | 1761 | 193.413 | 6.35 | 103.4 | 114.6 | 90.1 | 91.9  | 109    | 91    | 0.83486<br>2 | 0.0444809 |
| H0Y886         | NDUFB5      | NADH dehydrogenase [ubiquinone] 1 beta subcomplex subunit 5, mitochondrial (Fragment) OS=Homo sapiens GN=NDUFB5 PE=1 SV=1                        | 26.69902913 | 7  | 13  | 7  | 206  | 23.529  | 9.6  | 108.8 | 109.2 | 92.1 | 89.8  | 109    | 90.95 | 0.83440<br>4 | 0.0438903 |
| A0A024R1<br>N4 | XRCC6       | X-ray repair complementing defective repair in Chinese hamster cells 6 (Ku autoantigen, 70kDa), isoform CRA_a OS=Homo sapiens GN=XRCC6 PE=4 SV=1 | 51.55993432 | 31 | 98  | 31 | 609  | 69.799  | 6.64 | 110.4 | 107.7 | 91.8 | 90.1  | 109.05 | 90.95 | 0.83402<br>1 | 0.0434025 |
| P58107         | EPPK1       | Epiplakin OS=Homo sapiens GN=EPPK1 PE=1 SV=2                                                                                                     | 47.68172888 | 91 | 227 | 5  | 5090 | 555.279 | 5.6  | 109.5 | 108.7 | 97.5 | 84.4  | 109.1  | 90.95 | 0.83363<br>9 | 0.0429195 |



|                |               |                                                                                                                    |             |    |    |    |     |         |      |      |      |       |       |       |        |         |           |
|----------------|---------------|--------------------------------------------------------------------------------------------------------------------|-------------|----|----|----|-----|---------|------|------|------|-------|-------|-------|--------|---------|-----------|
| Q4J6C6         | PREPL         | Prolyl endopeptidase-like<br>OS=Homo sapiens GN=PREPL<br>PE=1 SV=1                                                 | 4.264099037 | 3  | 3  | 3  | 727 | 83.873  | 6.38 | 90.6 | 82.2 | 115.7 | 111.5 | 86.4  | 113.6  | 1.31481 | 0.0501369 |
| H0YCJ8         | RHCE          | Blood group Rh(CE) polypeptide<br>(Fragment) OS=Homo sapiens<br>GN=RHCE PE=4 SV=1                                  | 9.090909091 | 1  | 1  | 1  | 77  | 8.388   | 7.44 | 87.8 | 85   | 118   | 109.2 | 86.4  | 113.6  | 1.31481 | 0.0501369 |
| O75832         | PSMD10        | 26S proteasome non-ATPase<br>regulatory subunit 10 OS=Homo<br>sapiens GN=PSMD10 PE=1 SV=1                          | 28.76106195 | 4  | 5  | 4  | 226 | 24.412  | 6.1  | 88.5 | 84.3 | 121.2 | 105.9 | 86.4  | 113.55 | 1.31424 | 0.0505309 |
| V9HWEO         | HEL-S-7       | Annexin OS=Homo sapiens<br>GN=HEL-S-7 PE=2 SV=1                                                                    | 45.9375     | 13 | 23 | 12 | 320 | 35.914  | 5.05 | 93.5 | 79.4 | 118.3 | 108.8 | 86.45 | 113.55 | 1.31348 | 0.0510529 |
| Q7Z2Z4         | DKFZp68614200 | Putative uncharacterized protein<br>DKFZp68614200 (Fragment)<br>OS=Homo sapiens<br>GN=DKFZp68614200 PE=2 SV=1      | 2.234636872 | 1  | 1  | 1  | 358 | 40.704  | 5.38 | 85.8 | 87.1 | 122.4 | 104.7 | 86.45 | 113.55 | 1.31348 | 0.0510529 |
| A0A024R7<br>B7 | CDC37         | CDC37 cell division cycle 37<br>homolog (S. cerevisiae), isoform<br>CRA_a OS=Homo sapiens<br>GN=CDC37 PE=4 SV=1    | 15.07936508 | 4  | 7  | 4  | 378 | 44.44   | 5.25 | 88.6 | 84.4 | 119.4 | 107.7 | 86.5  | 113.55 | 1.31272 | 0.0515789 |
| P00966         | ASS1          | Argininosuccinate synthase<br>OS=Homo sapiens GN=ASS1<br>PE=1 SV=2                                                 | 23.78640777 | 10 | 14 | 10 | 412 | 46.501  | 8.02 | 87.1 | 85.9 | 120   | 107.1 | 86.5  | 113.55 | 1.31272 | 0.0515789 |
| A0A024R5<br>S9 | NEDD4         | Neural cell expressed,<br>developmentally down-regulated 4,<br>isoform CRA_b OS=Homo sapiens<br>GN=NEDD4 PE=4 SV=1 | 12          | 8  | 10 | 6  | 900 | 104.095 | 5.92 | 89.1 | 83.9 | 115.3 | 111.7 | 86.5  | 113.5  | 1.31214 | 0.0519827 |
| B7Z6L7         |               | cDNA FLJ61737, moderately<br>similar to Adrenodoxin-like protein<br>OS=Homo sapiens PE=2 SV=1                      | 16.66666667 | 2  | 2  | 2  | 186 | 19.89   | 5.54 | 85.6 | 87.5 | 99.3  | 127.7 | 86.55 | 113.5  | 1.31138 | 0.0525164 |
| P52788         | SMS           | Spermine synthase OS=Homo<br>sapiens GN=SMS PE=1 SV=2                                                              | 25.95628415 | 8  | 10 | 8  | 366 | 41.242  | 5.02 | 91.8 | 81.3 | 123.1 | 103.8 | 86.55 | 113.45 | 1.3108  | 0.0529264 |

|        |               |                                                                                               |             |    |    |    |      |         |      |      |      |       |       |       |        |         |           |
|--------|---------------|-----------------------------------------------------------------------------------------------|-------------|----|----|----|------|---------|------|------|------|-------|-------|-------|--------|---------|-----------|
| Q96RS6 | NUDCD<br>1    | NudC domain-containing protein 1<br>OS=Homo sapiens GN=NUDCD1<br>PE=1 SV=2                    | 10.80617496 | 6  | 7  | 6  | 583  | 66.713  | 5.11 | 89.4 | 83.7 | 119.8 | 107.1 | 86.55 | 113.45 | 1.3108  | 0.0529264 |
| P23526 | AHCY          | Adenosylhomocysteinase<br>OS=Homo sapiens GN=AHCY<br>PE=1 SV=4                                | 34.25925926 | 14 | 22 | 13 | 432  | 47.685  | 6.34 | 90.3 | 82.8 | 120.8 | 106   | 86.55 | 113.4  | 1.31023 | 0.0533394 |
| Q5GLZ8 | HERC4         | Probable E3 ubiquitin-protein<br>ligase HERC4 OS=Homo sapiens<br>GN=HERC4 PE=1 SV=1           | 1.135288553 | 1  | 1  | 1  | 1057 | 118.487 | 6.19 | 81.7 | 91.5 | 116.8 | 110   | 86.6  | 113.4  | 1.30947 | 0.0538844 |
| Q9H993 | ARMT1         | Protein-glutamate O-<br>methyltransferase OS=Homo<br>sapiens GN=ARMT1 PE=1 SV=1               | 5.215419501 | 2  | 2  | 2  | 441  | 51.14   | 5.76 | 94.8 | 78.4 | 117.6 | 109.2 | 86.6  | 113.4  | 1.30947 | 0.0538844 |
| V9HWJ1 | HEL-S-<br>64p | Glutathione synthetase OS=Homo<br>sapiens GN=HEL-S-64p PE=2<br>SV=1                           | 9.493670886 | 4  | 4  | 4  | 474  | 52.352  | 5.92 | 88.3 | 85   | 116.8 | 109.9 | 86.65 | 113.35 | 1.30814 | 0.0548566 |
| O60701 | UGDH          | UDP-glucose 6-dehydrogenase<br>OS=Homo sapiens GN=UGDH<br>PE=1 SV=1                           | 32.59109312 | 12 | 17 | 12 | 494  | 54.989  | 7.12 | 92.2 | 81.1 | 119.9 | 106.8 | 86.65 | 113.35 | 1.30814 | 0.0548566 |
| Q9H074 | PAIP1         | Polyadenylate-binding protein-<br>interacting protein 1 OS=Homo<br>sapiens GN=PAIP1 PE=1 SV=1 | 11.27348643 | 5  | 7  | 1  | 479  | 53.491  | 4.81 | 91.8 | 81.5 | 118.1 | 108.6 | 86.65 | 113.35 | 1.30814 | 0.0548566 |
| P13645 | KRT10         | Keratin, type I cytoskeletal 10<br>OS=Homo sapiens GN=KRT10<br>PE=1 SV=6                      | 33.90410959 | 18 | 44 | 15 | 584  | 58.792  | 5.21 | 83.1 | 90.2 | 124   | 102.7 | 86.65 | 113.35 | 1.30814 | 0.0548566 |
| P42229 | STAT5A        | Signal transducer and activator of<br>transcription 5A OS=Homo<br>sapiens GN=STAT5A PE=1 SV=1 | 6.297229219 | 4  | 5  | 1  | 794  | 90.59   | 6.39 | 79.1 | 94.2 | 119.7 | 107   | 86.65 | 113.35 | 1.30814 | 0.0548566 |
| P34932 | HSPA4         | Heat shock 70 kDa protein 4<br>OS=Homo sapiens GN=HSPA4<br>PE=1 SV=4                          | 42.26190476 | 29 | 51 | 26 | 840  | 94.271  | 5.19 | 90.2 | 83.3 | 118.4 | 108.1 | 86.75 | 113.25 | 1.30548 | 0.0568447 |
| P62633 | CNBP          | Cellular nucleic acid-binding<br>protein OS=Homo sapiens<br>GN=CNBP PE=1 SV=1                 | 35.59322034 | 5  | 15 | 5  | 177  | 19.45   | 7.71 | 84.3 | 89.2 | 112.3 | 114.1 | 86.75 | 113.2  | 1.3049  | 0.0572837 |

|                |       |                                                                                                                                                            |             |    |    |    |     |        |      |      |      |       |       |       |        |         |           |
|----------------|-------|------------------------------------------------------------------------------------------------------------------------------------------------------------|-------------|----|----|----|-----|--------|------|------|------|-------|-------|-------|--------|---------|-----------|
| Q5T5C7         | SARS  | Serine--tRNA ligase, cytoplasmic<br>OS=Homo sapiens GN=SARS<br>PE=1 SV=1                                                                                   | 19.7761194  | 9  | 14 | 9  | 536 | 61.274 | 7.06 | 90.9 | 82.7 | 113.7 | 112.7 | 86.8  | 113.2  | 1.30415 | 0.0578607 |
| A0A096LP<br>25 | AAK1  | AP2-associated protein kinase 1<br>(Fragment) OS=Homo sapiens<br>GN=AAK1 PE=1 SV=1                                                                         | 7.632093933 | 3  | 4  | 2  | 511 | 54.415 | 5.12 | 87   | 86.6 | 107.2 | 119.2 | 86.8  | 113.2  | 1.30415 | 0.0578607 |
| A0A0B4J2<br>C3 | TPT1  | Translationally-controlled tumor<br>protein OS=Homo sapiens<br>GN=TPT1 PE=1 SV=1                                                                           | 22.33502538 | 4  | 9  | 4  | 197 | 22.559 | 5.24 | 86.3 | 87.3 | 118.9 | 107.5 | 86.8  | 113.2  | 1.30415 | 0.0578607 |
| Q7L2H7         | EIF3M | Eukaryotic translation initiation<br>factor 3 subunit M OS=Homo<br>sapiens GN=EIF3M PE=1 SV=1                                                              | 29.67914439 | 8  | 16 | 8  | 374 | 42.476 | 5.63 | 93.5 | 80.1 | 117.9 | 108.5 | 86.8  | 113.2  | 1.30415 | 0.0578607 |
| P49643         | PRIM2 | DNA primase large subunit<br>OS=Homo sapiens GN=PRIM2<br>PE=1 SV=2                                                                                         | 13.55599214 | 5  | 6  | 5  | 509 | 58.769 | 7.91 | 89.2 | 84.4 | 131   | 95.4  | 86.8  | 113.2  | 1.30415 | 0.0578607 |
| A8K070         | GPS1  | COP9 signalosome complex<br>subunit 1 OS=Homo sapiens<br>GN=GPS1 PE=1 SV=1                                                                                 | 8.745247148 | 4  | 4  | 4  | 526 | 58.885 | 6.32 | 88   | 85.6 | 124.8 | 101.6 | 86.8  | 113.2  | 1.30415 | 0.0578607 |
| A0A140V<br>K69 |       | Aspartate aminotransferase<br>OS=Homo sapiens PE=2 SV=1                                                                                                    | 29.78208232 | 10 | 11 | 10 | 413 | 46.219 | 7.01 | 84.8 | 88.9 | 115.5 | 110.8 | 86.85 | 113.15 | 1.30282 | 0.0588917 |
| A0A140V<br>K27 |       | Leukotriene A(4) hydrolase<br>OS=Homo sapiens PE=2 SV=1                                                                                                    | 21.44026187 | 11 | 16 | 11 | 611 | 69.241 | 6.18 | 89.5 | 84.2 | 121   | 105.3 | 86.85 | 113.15 | 1.30282 | 0.0588917 |
| P61981         | YWHAG | 14-3-3 protein gamma OS=Homo<br>sapiens GN=YWHAG PE=1 SV=2                                                                                                 | 58.70445344 | 15 | 39 | 10 | 247 | 28.285 | 4.89 | 89.3 | 84.5 | 116   | 110.3 | 86.9  | 113.15 | 1.30207 | 0.0594815 |
| Q96KP4         | CNDP2 | Cytosolic non-specific dipeptidase<br>OS=Homo sapiens GN=CNDP2<br>PE=1 SV=2                                                                                | 13.68421053 | 4  | 5  | 4  | 475 | 52.845 | 5.97 | 89.8 | 84   | 117.4 | 108.8 | 86.9  | 113.1  | 1.3015  | 0.0599377 |
| A0A024R1<br>K7 | YWHAH | Tyrosine 3-<br>monooxygenase/tryptophan 5-<br>monooxygenase activation protein,<br>eta polypeptide, isoform CRA_b<br>OS=Homo sapiens GN=YWHAH<br>PE=3 SV=1 | 51.62601626 | 12 | 28 | 8  | 246 | 28.201 | 4.84 | 87.5 | 86.3 | 114.8 | 111.4 | 86.9  | 113.1  | 1.3015  | 0.0599377 |

|                |                |                                                                                                                                                                        |             |    |    |    |     |        |       |      |      |       |       |       |        |         |           |
|----------------|----------------|------------------------------------------------------------------------------------------------------------------------------------------------------------------------|-------------|----|----|----|-----|--------|-------|------|------|-------|-------|-------|--------|---------|-----------|
| B3KN49         |                | cDNA FLJ13562 fis, clone<br>PLACE1008080, highly similar to<br>Homo sapiens hexamethylene bis-<br>acetamide inducible 1 (HEXIM1),<br>mRNA OS=Homo sapiens PE=2<br>SV=1 | 4.735376045 | 1  | 1  | 1  | 359 | 40.582 | 4.89  | 95.1 | 78.7 | 119.4 | 106.8 | 86.9  | 113.1  | 1.3015  | 0.0599377 |
| A0A0C4D<br>FL7 | CYP51A<br>1    | Lanosterol 14-alpha demethylase<br>OS=Homo sapiens GN=CYP51A1<br>PE=1 SV=1                                                                                             | 36.54223969 | 16 | 38 | 16 | 509 | 57.242 | 8.53  | 88.2 | 85.6 | 105.2 | 121   | 86.9  | 113.1  | 1.3015  | 0.0599377 |
| P15509         | CSF2RA         | Granulocyte-macrophage colony-<br>stimulating factor receptor subunit<br>alpha OS=Homo sapiens<br>GN=CSF2RA PE=1 SV=1                                                  | 2.75        | 1  | 1  | 1  | 400 | 46.177 | 7.75  | 79.6 | 94.2 | 101.1 | 125   | 86.9  | 113.05 | 1.30092 | 0.0603971 |
| O43765         | SGTA           | Small glutamine-rich<br>tetratricopeptide repeat-containing<br>protein alpha OS=Homo sapiens<br>GN=SGTA PE=1 SV=1                                                      | 14.37699681 | 4  | 6  | 4  | 313 | 34.042 | 4.87  | 90.2 | 83.7 | 116.7 | 109.4 | 86.95 | 113.05 | 1.30017 | 0.0609989 |
| Q9NR45         | NANS           | Sialic acid synthase OS=Homo<br>sapiens GN=NANS PE=1 SV=2                                                                                                              | 32.31197772 | 8  | 12 | 8  | 359 | 40.281 | 6.74  | 88.5 | 85.4 | 117.7 | 108.4 | 86.95 | 113.05 | 1.30017 | 0.0609989 |
| A0A024R5<br>F7 | DHCR7          | 7-dehydrocholesterol reductase<br>isoform 1 OS=Homo sapiens<br>GN=DHCR7 PE=2 SV=1                                                                                      | 20          | 9  | 25 | 9  | 475 | 54.454 | 8.7   | 88.1 | 85.8 | 114.1 | 112   | 86.95 | 113.05 | 1.30017 | 0.0609989 |
| A0A087W<br>UF6 | FGF2           | Fibroblast growth factor OS=Homo<br>sapiens GN=FGF2 PE=1 SV=1                                                                                                          | 10.06944444 | 3  | 3  | 3  | 288 | 30.733 | 11.18 | 83.9 | 90   | 109.4 | 116.7 | 86.95 | 113.05 | 1.30017 | 0.0609989 |
| Q9BRQ0         | PYGO2          | Pygopus homolog 2 OS=Homo<br>sapiens GN=PYGO2 PE=1 SV=2                                                                                                                | 1.97044335  | 1  | 1  | 1  | 406 | 41.218 | 7.28  | 92.4 | 81.5 | 117.7 | 108.4 | 86.95 | 113.05 | 1.30017 | 0.0609989 |
| V9HWC7         | HEL-S-<br>128m | Epididymis secretory sperm<br>binding protein Li 128m OS=Homo<br>sapiens GN=HEL-S-128m PE=2<br>SV=1                                                                    | 51.78571429 | 11 | 23 | 11 | 224 | 25.019 | 6.38  | 87.5 | 86.4 | 119.4 | 106.7 | 86.95 | 113.05 | 1.30017 | 0.0609989 |
| A0A140VJ<br>T8 |                | Testicular tissue protein Li 164<br>OS=Homo sapiens PE=2 SV=1                                                                                                          | 43.81778742 | 14 | 20 | 14 | 461 | 49.941 | 4.82  | 84.7 | 89.3 | 118.9 | 107.1 | 87    | 113    | 1.29885 | 0.0620757 |

|        |              |                                                                                                                                     |             |    |     |    |      |         |      |      |      |       |       |       |        |         |           |
|--------|--------------|-------------------------------------------------------------------------------------------------------------------------------------|-------------|----|-----|----|------|---------|------|------|------|-------|-------|-------|--------|---------|-----------|
| Q68D85 | NCR3L<br>G1  | Natural cytotoxicity triggering<br>receptor 3 ligand 1 OS=Homo<br>sapiens GN=NCR3LG1 PE=1<br>SV=1                                   | 1.982378855 | 1  | 1   | 1  | 454  | 50.795  | 5.59 | 80.4 | 93.6 | 110.2 | 115.8 | 87    | 113    | 1.29885 | 0.0620757 |
| Q5JSZ5 | PRRC2<br>B   | Protein PRRC2B OS=Homo<br>sapiens GN=PRRC2B PE=1 SV=2                                                                               | 1.076716016 | 2  | 2   | 2  | 2229 | 242.817 | 8.34 | 89.7 | 84.4 | 116.9 | 109   | 87.05 | 112.95 | 1.29753 | 0.0631678 |
| P21291 | CSRP1        | Cysteine and glycine-rich protein 1<br>OS=Homo sapiens GN=CSRP1<br>PE=1 SV=3                                                        | 63.21243523 | 10 | 27  | 10 | 193  | 20.554  | 8.57 | 82.7 | 91.5 | 114.1 | 111.8 | 87.1  | 112.95 | 1.29679 | 0.0637913 |
| P08238 | HSP90A<br>B1 | Heat shock protein HSP 90-beta<br>OS=Homo sapiens<br>GN=HSP90AB1 PE=1 SV=4                                                          | 53.17679558 | 38 | 207 | 8  | 724  | 83.212  | 5.03 | 88.2 | 86   | 115.8 | 110   | 87.1  | 112.9  | 1.29621 | 0.0642756 |
| Q8IWW6 | ARHGA<br>P12 | Rho GTPase-activating protein 12<br>OS=Homo sapiens<br>GN=ARHGAP12 PE=1 SV=1                                                        | 2.836879433 | 2  | 2   | 2  | 846  | 96.196  | 7.61 | 85.3 | 88.9 | 109.7 | 116.1 | 87.1  | 112.9  | 1.29621 | 0.0642756 |
| A8K4M1 |              | cDNA FLJ75033, highly similar to<br>Homo sapiens RAS and EF-hand<br>domain containing (RASEF),<br>mRNA OS=Homo sapiens PE=2<br>SV=1 | 1.486486486 | 1  | 2   | 1  | 740  | 82.805  | 5.08 | 84.6 | 89.6 | 117.2 | 108.6 | 87.1  | 112.9  | 1.29621 | 0.0642756 |
| P80217 | IFI35        | Interferon-induced 35 kDa protein<br>OS=Homo sapiens GN=IFI35<br>PE=1 SV=5                                                          | 3.146853147 | 1  | 1   | 1  | 286  | 31.527  | 6.09 | 87.1 | 87.1 | 111.3 | 114.4 | 87.1  | 112.85 | 1.29564 | 0.0647631 |
| J3KMZ9 | LDLR         | Low-density lipoprotein receptor<br>(Fragment) OS=Homo sapiens<br>GN=LDLR PE=1 SV=1                                                 | 21.37566138 | 17 | 32  | 16 | 945  | 104.605 | 5.27 | 86.1 | 88.2 | 110.4 | 115.3 | 87.15 | 112.85 | 1.29489 | 0.0653993 |
| Q05655 | PRKCD        | Protein kinase C delta type<br>OS=Homo sapiens GN=PRKCD<br>PE=1 SV=2                                                                | 1.035502959 | 1  | 1   | 1  | 676  | 77.455  | 7.75 | 93.7 | 80.6 | 123.9 | 101.8 | 87.15 | 112.85 | 1.29489 | 0.0653993 |
| B2R9G9 |              | cDNA, FLJ94385, highly similar to<br>Homo sapiens cofactor required for<br>Sp1 transcriptional activation,                          | 4.333333333 | 2  | 2   | 2  | 600  | 65.348  | 9.23 | 88   | 86.3 | 106.8 | 118.8 | 87.15 | 112.8  | 1.29432 | 0.0658941 |

|                |               |                                                                                                                  |             |    |    |    |     |        |      |      |      |       |       |       |        |         |           |
|----------------|---------------|------------------------------------------------------------------------------------------------------------------|-------------|----|----|----|-----|--------|------|------|------|-------|-------|-------|--------|---------|-----------|
|                |               | subunit 7, 70kDa (CRSP7), mRNA<br>OS=Homo sapiens PE=2 SV=1                                                      |             |    |    |    |     |        |      |      |      |       |       |       |        |         |           |
| P60983         | GMFB          | Glia maturation factor beta<br>OS=Homo sapiens GN=GMFB<br>PE=1 SV=2                                              | 18.30985915 | 2  | 3  | 2  | 142 | 16.702 | 5.29 | 80.4 | 94   | 114.5 | 111.2 | 87.2  | 112.85 | 1.29415 | 0.0660402 |
| P11216         | PYGB          | Glycogen phosphorylase, brain<br>form OS=Homo sapiens<br>GN=PYGB PE=1 SV=5                                       | 12.33689205 | 8  | 14 | 6  | 843 | 96.635 | 6.86 | 90.9 | 83.5 | 117.1 | 108.5 | 87.2  | 112.8  | 1.29358 | 0.066539  |
| Q5U043         |               | S-(hydroxymethyl)glutathione<br>dehydrogenase OS=Homo sapiens<br>PE=2 SV=1                                       | 22.99465241 | 10 | 12 | 10 | 374 | 39.664 | 7.49 | 86.7 | 87.8 | 115.7 | 109.8 | 87.25 | 112.75 | 1.29226 | 0.0676948 |
| P42224         | STAT1         | Signal transducer and activator of<br>transcription 1-alpha/beta<br>OS=Homo sapiens GN=STAT1<br>PE=1 SV=2        | 30          | 20 | 24 | 20 | 750 | 87.28  | 6.05 | 87.1 | 87.4 | 120.2 | 105.3 | 87.25 | 112.75 | 1.29226 | 0.0676948 |
| A0A024R7<br>I5 | TRMT1         | TRM1 tRNA methyltransferase 1<br>homolog (S. cerevisiae), isoform<br>CRA_c OS=Homo sapiens<br>GN=TRMT1 PE=4 SV=1 | 8.042488619 | 4  | 4  | 4  | 659 | 72.188 | 7.64 | 91.8 | 82.8 | 115.8 | 109.6 | 87.3  | 112.7  | 1.29095 | 0.068867  |
| A0A024R<br>DS1 | HSPH1         | Heat shock 105kDa/110kDa<br>protein 1, isoform CRA_c<br>OS=Homo sapiens GN=HSPH1<br>PE=3 SV=1                    | 35.1981352  | 26 | 40 | 22 | 858 | 96.804 | 5.39 | 87.2 | 87.4 | 113.8 | 111.6 | 87.3  | 112.7  | 1.29095 | 0.068867  |
| A0A0A0M<br>TS2 | GPI           | Glucose-6-phosphate isomerase<br>(Fragment) OS=Homo sapiens<br>GN=GPI PE=1 SV=1                                  | 39.44153578 | 19 | 57 | 19 | 573 | 64.784 | 9.04 | 89.5 | 85.1 | 118.4 | 107   | 87.3  | 112.7  | 1.29095 | 0.068867  |
| Q14914         | PTGR1         | Prostaglandin reductase 1<br>OS=Homo sapiens GN=PTGR1<br>PE=1 SV=2                                               | 31.91489362 | 10 | 13 | 10 | 329 | 35.847 | 8.29 | 86.4 | 88.3 | 120.1 | 105.2 | 87.35 | 112.65 | 1.28964 | 0.0700556 |
| V9HW87         | HEL-S-<br>299 | Abhydrolase domain containing<br>14B, isoform CRA_a OS=Homo<br>sapiens GN=HEL-S-299 PE=2<br>SV=1                 | 15.23809524 | 2  | 7  | 2  | 210 | 22.332 | 6.4  | 86   | 88.7 | 119   | 106.3 | 87.35 | 112.65 | 1.28964 | 0.0700556 |

|             |           |                                                                               |             |    |     |    |      |         |      |      |      |       |       |       |        |         |           |
|-------------|-----------|-------------------------------------------------------------------------------|-------------|----|-----|----|------|---------|------|------|------|-------|-------|-------|--------|---------|-----------|
| P48449      | LSS       | Lanosterol synthase OS=Homo sapiens GN=LSS PE=1 SV=1                          | 28.68852459 | 18 | 32  | 18 | 732  | 83.255  | 6.61 | 89.3 | 85.5 | 114.8 | 110.4 | 87.4  | 112.6  | 1.28833 | 0.0712609 |
| Q16512      | PKN1      | Serine/threonine-protein kinase N1 OS=Homo sapiens GN=PKN1 PE=1 SV=2          | 2.229299363 | 2  | 2   | 1  | 942  | 103.868 | 6.37 | 83   | 91.8 | 113.6 | 111.6 | 87.4  | 112.6  | 1.28833 | 0.0712609 |
| O94855      | SEC24D    | Protein transport protein Sec24D OS=Homo sapiens GN=SEC24D PE=1 SV=2          | 5.910852713 | 6  | 6   | 5  | 1032 | 112.936 | 7.25 | 88.6 | 86.2 | 121.1 | 104.1 | 87.4  | 112.6  | 1.28833 | 0.0712609 |
| P35908      | KRT2      | Keratin, type II cytoskeletal 2 epidermal OS=Homo sapiens GN=KRT2 PE=1 SV=2   | 35.05477308 | 23 | 41  | 12 | 639  | 65.393  | 8    | 85.3 | 89.5 | 129.5 | 95.7  | 87.4  | 112.6  | 1.28833 | 0.0712609 |
| A0A024R AF1 | BIN1      | Bridging integrator 1, isoform CRA_k OS=Homo sapiens GN=BIN1 PE=4 SV=1        | 5.227655987 | 3  | 4   | 3  | 593  | 64.659  | 5.06 | 81.4 | 93.4 | 116.4 | 108.8 | 87.4  | 112.6  | 1.28833 | 0.0712609 |
| Q02790      | FKBP4     | Peptidyl-prolyl cis-trans isomerase FKBP4 OS=Homo sapiens GN=FKBP4 PE=1 SV=3  | 48.583878   | 19 | 31  | 19 | 459  | 51.772  | 5.43 | 86.3 | 88.6 | 116   | 109.1 | 87.45 | 112.55 | 1.28702 | 0.0724829 |
| Q86VX2      | COMMD 7   | COMM domain-containing protein 7 OS=Homo sapiens GN=COMMD7 PE=1 SV=2          | 6           | 1  | 1   | 1  | 200  | 22.526  | 5.92 | 84.4 | 90.5 | 121.3 | 103.8 | 87.45 | 112.55 | 1.28702 | 0.0724829 |
| B2R825      |           | Alpha-1,4 glucan phosphorylase OS=Homo sapiens PE=2 SV=1                      | 29.39787485 | 21 | 31  | 19 | 847  | 97.006  | 7.3  | 92.3 | 82.6 | 117.9 | 107.1 | 87.45 | 112.5  | 1.28645 | 0.0730227 |
| A0AVT1      | UBA6      | Ubiquitin-like modifier-activating enzyme 6 OS=Homo sapiens GN=UBA6 PE=1 SV=1 | 5.038022814 | 5  | 5   | 5  | 1052 | 117.895 | 6.14 | 88.5 | 86.4 | 118.9 | 106.1 | 87.45 | 112.5  | 1.28645 | 0.0730227 |
| A8K586      |           | AP-3 complex subunit beta OS=Homo sapiens PE=2 SV=1                           | 12.88848263 | 14 | 16  | 4  | 1094 | 121.214 | 5.97 | 86.9 | 88.1 | 117.2 | 107.9 | 87.5  | 112.55 | 1.28629 | 0.0731778 |
| O14732      | IMPA2     | Inositol monophosphatase 2 OS=Homo sapiens GN=IMPA2 PE=1 SV=1                 | 7.291666667 | 2  | 2   | 2  | 288  | 31.301  | 6.61 | 87.9 | 87.1 | 117.4 | 107.6 | 87.5  | 112.5  | 1.28571 | 0.0737219 |
| P07900      | HSP90A A1 | Heat shock protein HSP 90-alpha OS=Homo sapiens GN=HSP90AA1 PE=1 SV=5         | 47.67759563 | 36 | 189 | 23 | 732  | 84.607  | 5.02 | 87.4 | 87.6 | 114.4 | 110.6 | 87.5  | 112.5  | 1.28571 | 0.0737219 |

|                |              |                                                                                                                                |             |     |     |   |      |         |      |      |      |       |       |       |        |         |           |
|----------------|--------------|--------------------------------------------------------------------------------------------------------------------------------|-------------|-----|-----|---|------|---------|------|------|------|-------|-------|-------|--------|---------|-----------|
| B4DHQ3         |              | Phosphoserine aminotransferase<br>OS=Homo sapiens PE=2 SV=1                                                                    | 25.30120482 | 9   | 17  | 9 | 415  | 45.326  | 9.03 | 86.6 | 88.4 | 114.2 | 110.8 | 87.5  | 112.5  | 1.28571 | 0.0737219 |
| P21333         | FLNA         | Filamin-A OS=Homo sapiens<br>GN=FLNA PE=1 SV=4                                                                                 | 53.07895731 | 103 | 253 | 2 | 2647 | 280.564 | 6.06 | 86.1 | 88.9 | 108.7 | 116.3 | 87.5  | 112.5  | 1.28571 | 0.0737219 |
| Q9BYV7         | BCO2         | Beta,beta-carotene 9',10'-<br>oxygenase OS=Homo sapiens<br>GN=BCO2 PE=1 SV=5                                                   | 7.944732297 | 4   | 4   | 4 | 579  | 65.632  | 8.41 | 88.3 | 86.7 | 120.2 | 104.8 | 87.5  | 112.5  | 1.28571 | 0.0737219 |
| A8K5D4         | MPZL1        | Myelin protein zero-like 1, isoform<br>CRA_b OS=Homo sapiens<br>GN=MPZL1 PE=2 SV=1                                             | 13.38289963 | 3   | 6   | 3 | 269  | 29.064  | 8.72 | 83.9 | 91.1 | 107.1 | 117.9 | 87.5  | 112.5  | 1.28571 | 0.0737219 |
| Q6FIC5         | CLIC4        | Chloride intracellular channel<br>protein OS=Homo sapiens<br>GN=CLIC4 PE=2 SV=1                                                | 7.114624506 | 2   | 3   | 2 | 253  | 28.754  | 5.59 | 89   | 86.1 | 118.4 | 106.6 | 87.55 | 112.5  | 1.28498 | 0.0744261 |
| Q9HAW7         | UGT1A7       | UDP-glucuronosyltransferase 1-7<br>OS=Homo sapiens GN=UGT1A7<br>PE=1 SV=2                                                      | 16.41509434 | 7   | 8   | 7 | 530  | 59.779  | 7.78 | 86.6 | 88.5 | 116.1 | 108.8 | 87.55 | 112.45 | 1.28441 | 0.0749779 |
| A0A024R9<br>22 | C1orf11<br>2 | Chromosome 1 open reading<br>frame 112, isoform CRA_a<br>OS=Homo sapiens GN=C1orf112<br>PE=4 SV=1                              | 1.289566237 | 1   | 1   | 1 | 853  | 96.492  | 6    | 86.5 | 88.6 | 113.2 | 111.6 | 87.55 | 112.4  | 1.28384 | 0.0755334 |
| A0A087X1<br>Z3 | PSME2        | Proteasome activator complex<br>subunit 2 OS=Homo sapiens<br>GN=PSME2 PE=1 SV=1                                                | 23.22834646 | 6   | 8   | 6 | 254  | 29.108  | 6.71 | 90.9 | 84.2 | 120.8 | 104   | 87.55 | 112.4  | 1.28384 | 0.0755334 |
| Q8N122         | RPTOR        | Regulatory-associated protein of<br>mTOR OS=Homo sapiens<br>GN=RPTOR PE=1 SV=1                                                 | 6.217228464 | 5   | 6   | 5 | 1335 | 148.942 | 6.89 | 89.7 | 85.4 | 120.4 | 104.4 | 87.55 | 112.4  | 1.28384 | 0.0755334 |
| Q5T5H1         | ENSA         | Alpha-endosulfine OS=Homo<br>sapiens GN=ENSA PE=1 SV=1                                                                         | 12.8342246  | 2   | 3   | 2 | 187  | 20.981  | 7.87 | 87.7 | 87.5 | 113.8 | 111   | 87.6  | 112.4  | 1.28311 | 0.0762513 |
| A0A024R2<br>03 | PSME3        | Proteasome (Prosome, macropain)<br>activator subunit 3 (PA28 gamma<br>Ki), isoform CRA_a OS=Homo<br>sapiens GN=PSME3 PE=4 SV=1 | 30.18867925 | 7   | 10  | 7 | 265  | 30.87   | 6.71 | 92.1 | 83.1 | 119.5 | 105.3 | 87.6  | 112.4  | 1.28311 | 0.0762513 |



|                |              |                                                                                                                                                     |             |    |    |    |     |         |      |      |      |       |       |       |        |         |           |
|----------------|--------------|-----------------------------------------------------------------------------------------------------------------------------------------------------|-------------|----|----|----|-----|---------|------|------|------|-------|-------|-------|--------|---------|-----------|
| Q8N7G1         |              | Purine nucleoside phosphorylase<br>OS=Homo sapiens PE=2 SV=1                                                                                        | 48.12286689 | 12 | 17 | 12 | 293 | 32.53   | 7.21 | 92.5 | 82.7 | 111.9 | 112.8 | 87.6  | 112.35 | 1.28253 | 0.0768147 |
| B2R6J2         |              | cDNA, FLJ92973, highly similar to<br>Homo sapiens villin 2 (ezrin)<br>(VIL2), mRNA OS=Homo sapiens<br>PE=2 SV=1                                     | 50.34129693 | 35 | 67 | 20 | 586 | 69.358  | 6.27 | 84.3 | 91   | 111   | 113.8 | 87.65 | 112.4  | 1.28237 | 0.0769744 |
| V9HW12         | HEL-S-<br>2a | Epididymis secretory sperm<br>binding protein Li 2a OS=Homo<br>sapiens GN=HEL-S-2a PE=2<br>SV=1                                                     | 40.90909091 | 10 | 27 | 9  | 198 | 21.878  | 5.97 | 84   | 91.3 | 118   | 106.7 | 87.65 | 112.35 | 1.2818  | 0.0775421 |
| A8K180         |              | cDNA FLJ76749, highly similar to<br>Homo sapiens Wiskott-Aldrich<br>syndrome-like (WASL), mRNA<br>OS=Homo sapiens PE=2 SV=1                         | 2.772277228 | 1  | 1  | 1  | 505 | 54.735  | 8.12 | 83   | 92.3 | 107.4 | 117.3 | 87.65 | 112.35 | 1.2818  | 0.0775421 |
| Q13158         | FADD         | FAS-associated death domain<br>protein OS=Homo sapiens<br>GN=FADD PE=1 SV=1                                                                         | 8.653846154 | 1  | 2  | 1  | 208 | 23.265  | 5.69 | 90.1 | 85.2 | 107.6 | 117   | 87.65 | 112.3  | 1.28123 | 0.0781135 |
| A0A024R3<br>E3 | APOA1        | Apolipoprotein A-I, isoform CRA_a<br>OS=Homo sapiens GN=APOA1<br>PE=3 SV=1                                                                          | 5.992509363 | 1  | 11 | 1  | 267 | 30.759  | 5.76 | 90.4 | 85   | 107.2 | 117.4 | 87.7  | 112.3  | 1.2805  | 0.0788504 |
| P40763         | STAT3        | Signal transducer and activator of<br>transcription 3 OS=Homo sapiens<br>GN=STAT3 PE=1 SV=2                                                         | 19.61038961 | 13 | 20 | 13 | 770 | 88.011  | 6.3  | 86.9 | 88.5 | 118.4 | 106.2 | 87.7  | 112.3  | 1.2805  | 0.0788504 |
| Q13325         | IFIT5        | Interferon-induced protein with<br>tetratricopeptide repeats 5<br>OS=Homo sapiens GN=IFIT5<br>PE=1 SV=1                                             | 3.319502075 | 1  | 2  | 1  | 482 | 55.812  | 7.4  | 92.9 | 82.6 | 114.5 | 110   | 87.75 | 112.25 | 1.2792  | 0.0801766 |
| A8KA19         |              | cDNA FLJ75831, highly similar to<br>Homo sapiens exportin, tRNA<br>(nuclear export receptor for tRNAs)<br>(XPOT), mRNA OS=Homo sapiens<br>PE=2 SV=1 | 4.885654886 | 4  | 6  | 4  | 962 | 109.849 | 5.39 | 96.1 | 79.4 | 118.6 | 105.9 | 87.75 | 112.25 | 1.2792  | 0.0801766 |

|                |        |                                                                                                                                    |             |   |    |   |     |        |      |       |      |       |       |       |        |         |           |
|----------------|--------|------------------------------------------------------------------------------------------------------------------------------------|-------------|---|----|---|-----|--------|------|-------|------|-------|-------|-------|--------|---------|-----------|
| A0A024R4<br>R3 | CNOT3  | CCR4-NOT transcription complex,<br>subunit 3, isoform CRA_a<br>OS=Homo sapiens GN=CNOT3<br>PE=4 SV=1                               | 0.929614874 | 1 | 1  | 1 | 753 | 81.822 | 6.2  | 90.7  | 84.9 | 116.7 | 107.8 | 87.8  | 112.25 | 1.27847 | 0.0809284 |
| Q32Q10         | RSU1   | RSU1 protein (Fragment)<br>OS=Homo sapiens GN=RSU1<br>PE=2 SV=1                                                                    | 5.714285714 | 2 | 2  | 2 | 280 | 31.34  | 9.09 | 89.8  | 85.8 | 116.4 | 108   | 87.8  | 112.2  | 1.2779  | 0.0815206 |
| A8K168         |        | Malic enzyme OS=Homo sapiens<br>PE=2 SV=1                                                                                          | 9.79020979  | 4 | 4  | 4 | 572 | 64.095 | 6.13 | 85.1  | 90.5 | 115.3 | 109.1 | 87.8  | 112.2  | 1.2779  | 0.0815206 |
| V9HWA6         | HEL32  | Epididymis luminal protein 32<br>OS=Homo sapiens GN=HEL32<br>PE=2 SV=1                                                             | 42.42424242 | 8 | 19 | 7 | 165 | 18.493 | 7.85 | 84.6  | 91   | 113.7 | 110.7 | 87.8  | 112.2  | 1.2779  | 0.0815206 |
| B3KNU3         |        | cDNA FLJ30480 fis, clone<br>BRAWH1000174, moderately<br>similar to Rho-GTPase-activating<br>protein 8 OS=Homo sapiens PE=2<br>SV=1 | 3.804347826 | 1 | 1  | 1 | 368 | 40.872 | 6.73 | 109   | 66.6 | 124.4 | 100   | 87.8  | 112.2  | 1.2779  | 0.0815206 |
| Q9BTT0         | ANP32E | Acidic leucine-rich nuclear<br>phosphoprotein 32 family member<br>E OS=Homo sapiens GN=ANP32E<br>PE=1 SV=1                         | 13.80597015 | 3 | 6  | 3 | 268 | 30.674 | 3.85 | 96.7  | 78.9 | 124.1 | 100.3 | 87.8  | 112.2  | 1.2779  | 0.0815206 |
| Q9BS40         | LXN    | Latexin OS=Homo sapiens<br>GN=LXN PE=1 SV=2                                                                                        | 17.56756757 | 3 | 4  | 3 | 222 | 25.734 | 5.78 | 78.8  | 96.8 | 121.4 | 103   | 87.8  | 112.2  | 1.2779  | 0.0815206 |
| A0A140VJ<br>R2 |        | Testicular tissue protein Li 138<br>OS=Homo sapiens PE=2 SV=1                                                                      | 3.245436105 | 1 | 1  | 1 | 493 | 54.513 | 6    | 101.7 | 74   | 112.3 | 112   | 87.85 | 112.15 | 1.27661 | 0.0828825 |
| D3DWY7         | VBP1   | von Hippel-Lindau binding protein<br>1, isoform CRA_b OS=Homo<br>sapiens GN=VBP1 PE=4 SV=1                                         | 12.01716738 | 3 | 3  | 3 | 233 | 26.519 | 9.01 | 91.4  | 84.3 | 116.2 | 108   | 87.85 | 112.1  | 1.27604 | 0.0834868 |
| Q9NPF4         | OSGEP  | Probable tRNA N6-adenosine<br>threonylcarbamoyltransferase<br>OS=Homo sapiens GN=OSGEP<br>PE=1 SV=1                                | 12.53731343 | 3 | 3  | 3 | 335 | 36.403 | 6.35 | 88.7  | 87   | 116.1 | 108.1 | 87.85 | 112.1  | 1.27604 | 0.0834868 |

|                |             |                                                                                                                                                                      |             |    |    |    |      |         |      |      |      |       |       |       |        |         |           |
|----------------|-------------|----------------------------------------------------------------------------------------------------------------------------------------------------------------------|-------------|----|----|----|------|---------|------|------|------|-------|-------|-------|--------|---------|-----------|
| Q9NQW7         | XPNPE<br>P1 | Xaa-Pro aminopeptidase 1<br>OS=Homo sapiens GN=XPNPEP1<br>PE=1 SV=3                                                                                                  | 15.24879615 | 7  | 9  | 1  | 623  | 69.873  | 5.67 | 92   | 83.8 | 119.4 | 104.9 | 87.9  | 112.15 | 1.27588 | 0.0836541 |
| Q9H6Z4         | RANBP3      | Ran-binding protein 3 OS=Homo<br>sapiens GN=RANBP3 PE=1 SV=1                                                                                                         | 14.99118166 | 6  | 8  | 6  | 567  | 60.173  | 4.78 | 89.9 | 85.9 | 121.5 | 102.8 | 87.9  | 112.15 | 1.27588 | 0.0836541 |
| HOYL70         | TLE3        | Transducin-like enhancer protein 3<br>OS=Homo sapiens GN=TLE3<br>PE=1 SV=1                                                                                           | 4.603580563 | 3  | 3  | 3  | 782  | 84.425  | 7.27 | 83.2 | 92.6 | 123.6 | 100.7 | 87.9  | 112.15 | 1.27588 | 0.0836541 |
| Q99497         | PARK7       | Protein deglycase DJ-1 OS=Homo<br>sapiens GN=PARK7 PE=1 SV=2                                                                                                         | 61.9047619  | 10 | 24 | 10 | 189  | 19.878  | 6.79 | 86.8 | 89   | 116.3 | 107.9 | 87.9  | 112.1  | 1.27531 | 0.0842627 |
| P49321         | NASP        | Nuclear autoantigenic sperm<br>protein OS=Homo sapiens<br>GN=NASP PE=1 SV=2                                                                                          | 18.65482234 | 12 | 16 | 12 | 788  | 85.186  | 4.3  | 92.7 | 83.1 | 122.1 | 102.1 | 87.9  | 112.1  | 1.27531 | 0.0842627 |
| Q9BV73         | CEP250      | Centrosome-associated protein<br>CEP250 OS=Homo sapiens<br>GN=CEP250 PE=1 SV=2                                                                                       | 1.31040131  | 3  | 3  | 3  | 2442 | 280.967 | 5.02 | 88.6 | 87.3 | 112.8 | 111.3 | 87.95 | 112.05 | 1.27402 | 0.0856614 |
| A8K690         |             | cDNA FLJ76863, highly similar to<br>Homo sapiens stress-induced-<br>phosphoprotein 1 (Hsp70/Hsp90-<br>organizing protein) (STIP1), mRNA<br>OS=Homo sapiens PE=2 SV=1 | 58.93186004 | 39 | 67 | 39 | 543  | 62.615  | 6.8  | 91.4 | 84.5 | 116.7 | 107.4 | 87.95 | 112.05 | 1.27402 | 0.0856614 |
| B4DNW0         |             | cDNA FLJ60317, highly similar to<br>Aminoacylase-1 (EC 3.5.1.14)<br>OS=Homo sapiens PE=2 SV=1                                                                        | 14.45783133 | 5  | 5  | 5  | 498  | 55.959  | 7.03 | 87.6 | 88.3 | 119.1 | 104.9 | 87.95 | 112    | 1.27345 | 0.0862824 |
| A0A024R0<br>36 | DAB2        | Disabled homolog 2, mitogen-<br>responsive phosphoprotein<br>(Drosophila), isoform CRA_a<br>OS=Homo sapiens GN=DAB2<br>PE=4 SV=1                                     | 29.61038961 | 17 | 29 | 17 | 770  | 82.397  | 5.53 | 90.3 | 85.7 | 116.7 | 107.3 | 88    | 112    | 1.27273 | 0.0870786 |
| Q15738         | NSDHL       | Sterol-4-alpha-carboxylate 3-<br>dehydrogenase, decarboxylating<br>OS=Homo sapiens GN=NSDHL<br>PE=1 SV=2                                                             | 48.52546917 | 16 | 65 | 16 | 373  | 41.874  | 8.06 | 86.6 | 89.4 | 112.5 | 111.5 | 88    | 112    | 1.27273 | 0.0870786 |

|        |          |                                                                                                                     |             |    |    |    |     |         |      |      |      |       |       |       |        |         |           |
|--------|----------|---------------------------------------------------------------------------------------------------------------------|-------------|----|----|----|-----|---------|------|------|------|-------|-------|-------|--------|---------|-----------|
| Q8TDH9 | BLOC1S5  | Biogenesis of lysosome-related organelles complex 1 subunit 5<br>OS=Homo sapiens GN=BLOC1S5<br>PE=1 SV=1            | 5.347593583 | 1  | 1  | 1  | 187 | 21.596  | 7.59 | 84.6 | 91.4 | 110.2 | 113.8 | 88    | 112    | 1.27273 | 0.0870786 |
| Q5U0F4 | EIF3S2   | Eukaryotic translation initiation factor 3 subunit I OS=Homo sapiens GN=EIF3S2 PE=2 SV=1                            | 17.53846154 | 5  | 7  | 5  | 325 | 36.479  | 5.64 | 89.3 | 86.7 | 119.4 | 104.6 | 88    | 112    | 1.27273 | 0.0870786 |
| B3KMQ6 |          | cDNA FLJ12172 fis, clone MAMMA1000684, highly similar to Opioid growth factor receptor<br>OS=Homo sapiens PE=2 SV=1 | 2.363367799 | 1  | 2  | 1  | 677 | 73.324  | 4.84 | 90.2 | 85.8 | 120.3 | 103.6 | 88    | 111.95 | 1.27216 | 0.0877082 |
| B4E1C2 | KNG1     | Kininogen 1, isoform CRA_b<br>OS=Homo sapiens GN=KNG1<br>PE=2 SV=1                                                  | 1.397515528 | 1  | 1  | 1  | 644 | 71.87   | 6.81 | 83.9 | 92.2 | 90.8  | 133.2 | 88.05 | 112    | 1.272   | 0.0878802 |
| Q9H974 | QTRTD1   | Queuine tRNA-ribosyltransferase accessory subunit OS=Homo sapiens GN=QTRTD1 PE=1 SV=1                               | 15.6626506  | 4  | 4  | 4  | 415 | 46.683  | 6.81 | 93.1 | 83   | 113.6 | 110.3 | 88.05 | 111.95 | 1.27144 | 0.0885144 |
| P49588 | AARS     | Alanine--tRNA ligase, cytoplasmic OS=Homo sapiens GN=AARS<br>PE=1 SV=2                                              | 41.52892562 | 33 | 53 | 33 | 968 | 106.743 | 5.53 | 88.2 | 87.9 | 114.5 | 109.4 | 88.05 | 111.95 | 1.27144 | 0.0885144 |
| Q12841 | FSTL1    | Follistatin-related protein 1 OS=Homo sapiens GN=FSTL1<br>PE=1 SV=1                                                 | 16.55844156 | 5  | 6  | 5  | 308 | 34.963  | 5.52 | 87.6 | 88.5 | 115.3 | 108.6 | 88.05 | 111.95 | 1.27144 | 0.0885144 |
| P58546 | MTPN     | Myotrophin OS=Homo sapiens GN=MTPN PE=1 SV=2                                                                        | 41.52542373 | 4  | 5  | 4  | 118 | 12.887  | 5.52 | 83.7 | 92.4 | 114   | 109.9 | 88.05 | 111.95 | 1.27144 | 0.0885144 |
| B4E2P4 |          | cDNA FLJ58474, highly similar to Xaa-Pro aminopeptidase 1 (EC 3.4.11.9) OS=Homo sapiens PE=2 SV=1                   | 23.63636364 | 7  | 8  | 1  | 440 | 49.564  | 6.3  | 82.7 | 93.4 | 110.9 | 113   | 88.05 | 111.95 | 1.27144 | 0.0885144 |
| Q8N6L1 | KRTCA P2 | Keratinocyte-associated protein 2 OS=Homo sapiens GN=KRTCAP2<br>PE=1 SV=2                                           | 12.5        | 1  | 2  | 1  | 136 | 14.669  | 9.61 | 78.5 | 97.6 | 105.8 | 118.1 | 88.05 | 111.95 | 1.27144 | 0.0885144 |

|                |               |                                                                                                         |             |    |    |    |     |        |      |      |      |       |       |       |        |         |           |
|----------------|---------------|---------------------------------------------------------------------------------------------------------|-------------|----|----|----|-----|--------|------|------|------|-------|-------|-------|--------|---------|-----------|
| G3V5T9         | CDK2          | Cyclin-dependent kinase 2<br>OS=Homo sapiens GN=CDK2<br>PE=1 SV=1                                       | 30.92485549 | 8  | 11 | 6  | 346 | 39.153 | 8.62 | 88   | 88.2 | 112.5 | 111.4 | 88.1  | 111.95 | 1.27072 | 0.0893261 |
| Q14558         | PRPSA<br>P1   | Phosphoribosyl pyrophosphate<br>synthase-associated protein 1<br>OS=Homo sapiens GN=PRPSA1<br>PE=1 SV=2 | 17.41573034 | 5  | 5  | 2  | 356 | 39.369 | 7.2  | 88.8 | 87.4 | 117.5 | 106.4 | 88.1  | 111.95 | 1.27072 | 0.0893261 |
| P19623         | SRM           | Spermidine synthase OS=Homo<br>sapiens GN=SRM PE=1 SV=1                                                 | 35.43046358 | 6  | 11 | 6  | 302 | 33.803 | 5.49 | 93.6 | 82.6 | 114   | 109.8 | 88.1  | 111.9  | 1.27015 | 0.089969  |
| B2RE43         |               | cDNA, FLJ96916, highly similar to<br>Homo sapiens netrin 4 (NTN4),<br>mRNA OS=Homo sapiens PE=2<br>SV=1 | 2.388535032 | 1  | 1  | 1  | 628 | 70.027 | 8    | 86   | 90.2 | 97.2  | 126.6 | 88.1  | 111.9  | 1.27015 | 0.089969  |
| A0A087X0<br>N3 | NOL4L         | Nucleolar protein 4-like OS=Homo<br>sapiens GN=NOL4L PE=1 SV=1                                          | 2.352941176 | 1  | 1  | 1  | 680 | 74.178 | 5.77 | 90.6 | 85.7 | 113.3 | 110.5 | 88.15 | 111.9  | 1.26943 | 0.0907911 |
| A0A0K0K<br>1K7 | HEL-S-<br>304 | 6-phosphogluconolactonase,<br>isoform CRA_b OS=Homo sapiens<br>GN=HEL-S-304 PE=2 SV=1                   | 44.96124031 | 9  | 12 | 9  | 258 | 27.53  | 6.05 | 86.1 | 90.2 | 118.1 | 105.6 | 88.15 | 111.85 | 1.26886 | 0.0914428 |
| O43653         | PSCA          | Prostate stem cell antigen<br>OS=Homo sapiens GN=PSCA<br>PE=1 SV=1                                      | 22.76422764 | 3  | 8  | 3  | 123 | 12.903 | 5.29 | 83.3 | 93   | 124.7 | 99    | 88.15 | 111.85 | 1.26886 | 0.0914428 |
| A0A024R3<br>V8 | TSNAX         | Translin-associated factor X,<br>isoform CRA_c OS=Homo sapiens<br>GN=TSNAX PE=4 SV=1                    | 23.44827586 | 6  | 8  | 6  | 290 | 33.092 | 6.55 | 88.2 | 88.2 | 114.8 | 108.8 | 88.2  | 111.8  | 1.26757 | 0.0929355 |
| A0A0A0M<br>TQ8 | CCDC17<br>5   | Coiled-coil domain-containing<br>protein 175 OS=Homo sapiens<br>GN=CCDC175 PE=1 SV=1                    | 1.086956522 | 1  | 1  | 1  | 828 | 97.353 | 5.99 | 82.1 | 94.3 | 117   | 106.6 | 88.2  | 111.8  | 1.26757 | 0.0929355 |
| I3L0W4         | SAT2          | Diamine acetyltransferase 2<br>OS=Homo sapiens GN=SAT2<br>PE=1 SV=1                                     | 6.617647059 | 1  | 1  | 1  | 136 | 15.047 | 6.01 | 92.2 | 84.2 | 114.5 | 109   | 88.2  | 111.75 | 1.26701 | 0.0936002 |
| A8K486         |               | Peptidyl-prolyl cis-trans isomerase<br>OS=Homo sapiens PE=2 SV=1                                        | 70.90909091 | 12 | 78 | 11 | 165 | 18.002 | 6.9  | 91.1 | 85.4 | 115   | 108.5 | 88.25 | 111.75 | 1.26629 | 0.0944477 |

|            |          |                                                                                                                                     |             |    |    |    |     |        |      |      |      |       |       |       |        |         |           |
|------------|----------|-------------------------------------------------------------------------------------------------------------------------------------|-------------|----|----|----|-----|--------|------|------|------|-------|-------|-------|--------|---------|-----------|
| P13797     | PLS3     | Plastin-3 OS=Homo sapiens<br>GN=PLS3 PE=1 SV=4                                                                                      | 38.25396825 | 23 | 43 | 19 | 630 | 70.766 | 5.6  | 88.2 | 88.3 | 114.2 | 109.3 | 88.25 | 111.75 | 1.26629 | 0.0944477 |
| Q13433     | SLC39A6  | Zinc transporter ZIP6 OS=Homo sapiens<br>GN=SLC39A6 PE=1 SV=3                                                                       | 2.649006623 | 2  | 2  | 2  | 755 | 84.993 | 6.95 | 91.1 | 85.4 | 103   | 120.5 | 88.25 | 111.75 | 1.26629 | 0.0944477 |
| A0A024R0L6 | PAFAH1B3 | Platelet-activating factor acetylhydrolase, isoform lb, gamma subunit 29kDa, isoform CRA_a OS=Homo sapiens<br>GN=PAFAH1B3 PE=4 SV=1 | 27.27272727 | 5  | 5  | 5  | 231 | 25.718 | 6.84 | 87.1 | 89.4 | 118   | 105.5 | 88.25 | 111.75 | 1.26629 | 0.0944477 |
| P13647     | KRT5     | Keratin, type II cytoskeletal 5 OS=Homo sapiens<br>GN=KRT5 PE=1 SV=3                                                                | 24.40677966 | 18 | 60 | 7  | 590 | 62.34  | 7.74 | 83   | 93.5 | 120.3 | 103.2 | 88.25 | 111.75 | 1.26629 | 0.0944477 |
| O75822     | EIF3J    | Eukaryotic translation initiation factor 3 subunit J OS=Homo sapiens<br>GN=EIF3J PE=1 SV=2                                          | 36.04651163 | 8  | 14 | 8  | 258 | 29.045 | 4.83 | 88.4 | 88.2 | 113.3 | 110.1 | 88.3  | 111.7  | 1.26501 | 0.0959793 |
| P21399     | ACO1     | Cytoplasmic aconitate hydratase OS=Homo sapiens<br>GN=ACO1 PE=1 SV=3                                                                | 20.80989876 | 13 | 15 | 13 | 889 | 98.337 | 6.68 | 91.1 | 85.5 | 116.7 | 106.7 | 88.3  | 111.7  | 1.26501 | 0.0959793 |
| O75223     | GGCT     | Gamma-glutamylcyclotransferase OS=Homo sapiens<br>GN=GGCT PE=1 SV=1                                                                 | 17.55319149 | 3  | 6  | 3  | 188 | 20.994 | 5.14 | 87.9 | 88.7 | 117.7 | 105.7 | 88.3  | 111.7  | 1.26501 | 0.0959793 |
| Q9NRR3     | CDC42SE2 | CDC42 small effector protein 2 OS=Homo sapiens<br>GN=CDC42SE2 PE=1 SV=1                                                             | 22.61904762 | 1  | 2  | 1  | 84  | 9.217  | 8.35 | 83.6 | 93   | 105.5 | 117.9 | 88.3  | 111.7  | 1.26501 | 0.0959793 |
| P49368     | CCT3     | T-complex protein 1 subunit gamma OS=Homo sapiens<br>GN=CCT3 PE=1 SV=4                                                              | 58.71559633 | 32 | 73 | 32 | 545 | 60.495 | 6.49 | 91.8 | 84.9 | 114.3 | 109.1 | 88.35 | 111.7  | 1.26429 | 0.0968431 |
| Q16775     | HAGH     | Hydroxyacylglutathione hydrolase, mitochondrial OS=Homo sapiens<br>GN=HAGH PE=1 SV=2                                                | 23.7012987  | 6  | 7  | 6  | 308 | 33.784 | 8.12 | 86.5 | 90.2 | 116.7 | 106.7 | 88.35 | 111.7  | 1.26429 | 0.0968431 |
| B5BU38     | ANXA1    | Annexin OS=Homo sapiens<br>GN=ANXA1 PE=2 SV=1                                                                                       | 50.57803468 | 16 | 41 | 16 | 346 | 38.656 | 7.02 | 92   | 84.7 | 118.7 | 104.7 | 88.35 | 111.7  | 1.26429 | 0.0968431 |

|                |         |                                                                                                                                         |             |    |    |    |      |         |      |      |       |       |       |       |        |         |           |
|----------------|---------|-----------------------------------------------------------------------------------------------------------------------------------------|-------------|----|----|----|------|---------|------|------|-------|-------|-------|-------|--------|---------|-----------|
| P04259         | KRT6B   | Keratin, type II cytoskeletal 6B<br>OS=Homo sapiens GN=KRT6B<br>PE=1 SV=5                                                               | 18.08510638 | 14 | 74 | 1  | 564  | 60.03   | 8    | 82.3 | 94.4  | 82.2  | 141.2 | 88.35 | 111.7  | 1.26429 | 0.0968431 |
| A0A024R<br>DY0 | RANBP5  | RAN binding protein 5, isoform<br>CRA_d OS=Homo sapiens<br>GN=RANBP5 PE=4 SV=1                                                          | 28.62351869 | 24 | 42 | 23 | 1097 | 123.55  | 4.94 | 90.8 | 85.9  | 115.3 | 108   | 88.35 | 111.65 | 1.26372 | 0.0975305 |
| Q13363         | CTBP1   | C-terminal-binding protein 1<br>OS=Homo sapiens GN=CTBP1<br>PE=1 SV=2                                                                   | 8.181818182 | 4  | 4  | 1  | 440  | 47.505  | 6.77 | 90.8 | 85.9  | 125   | 98.3  | 88.35 | 111.65 | 1.26372 | 0.0975305 |
| B2RDY9         |         | Adenylyl cyclase-associated<br>protein OS=Homo sapiens PE=2<br>SV=1                                                                     | 36.84210526 | 15 | 22 | 15 | 475  | 51.583  | 8.22 | 87.5 | 89.2  | 114.5 | 108.7 | 88.35 | 111.6  | 1.26316 | 0.0982224 |
| Q96C23         | GALM    | Aldose 1-epimerase OS=Homo<br>sapiens GN=GALM PE=1 SV=1                                                                                 | 4.093567251 | 1  | 2  | 1  | 342  | 37.742  | 6.65 | 88.9 | 87.8  | 118.7 | 104.5 | 88.35 | 111.6  | 1.26316 | 0.0982224 |
| A0A024R2<br>Q7 | CLEC3B  | C-type lectin domain family 3,<br>member B, isoform CRA_a<br>OS=Homo sapiens GN=CLEC3B<br>PE=4 SV=1                                     | 35.64356436 | 5  | 11 | 5  | 202  | 22.522  | 5.67 | 85.9 | 90.8  | 91.3  | 131.9 | 88.35 | 111.6  | 1.26316 | 0.0982224 |
| A0A0A0M<br>RJ7 | F5      | Coagulation factor V OS=Homo<br>sapiens GN=F5 PE=1 SV=1                                                                                 | 2.1982952   | 4  | 4  | 4  | 2229 | 252.078 | 6.05 | 74.9 | 101.8 | 101.4 | 121.8 | 88.35 | 111.6  | 1.26316 | 0.0982224 |
| V9HWD6         | HEL-S-1 | Epididymis secretory protein Li 1<br>OS=Homo sapiens GN=HEL-S-1<br>PE=2 SV=1                                                            | 52.03252033 | 11 | 33 | 5  | 246  | 28.065  | 4.83 | 90.5 | 86.3  | 113.6 | 109.6 | 88.4  | 111.6  | 1.26244 | 0.0991016 |
| B4DWB5         |         | cDNA FLJ53931, highly similar to<br>Bifunctional 3'-<br>phosphoadenosine5'-<br>phosphosulfate synthetase 2<br>OS=Homo sapiens PE=2 SV=1 | 22.16828479 | 12 | 19 | 12 | 618  | 69.988  | 7.33 | 90   | 86.8  | 112.2 | 111   | 88.4  | 111.6  | 1.26244 | 0.0991016 |
| A4D0Z4         | GCC1    | GRIP and coiled-coil domain<br>containing 1 OS=Homo sapiens<br>GN=GCC1 PE=4 SV=1                                                        | 2.193548387 | 2  | 2  | 2  | 775  | 87.757  | 5.45 | 95.1 | 81.7  | 117.6 | 105.6 | 88.4  | 111.6  | 1.26244 | 0.0991016 |
| A0A024R5<br>29 | DAK     | Dihydroxyacetone kinase 2<br>homolog (Yeast), isoform CRA_a                                                                             | 12.69565217 | 5  | 6  | 5  | 575  | 58.94   | 7.49 | 90.3 | 86.6  | 109.9 | 113.2 | 88.45 | 111.55 | 1.26116 | 0.100693  |

|                |                 |                                                                                               |             |    |    |    |      |         |       |      |       |       |       |       |        |         |          |
|----------------|-----------------|-----------------------------------------------------------------------------------------------|-------------|----|----|----|------|---------|-------|------|-------|-------|-------|-------|--------|---------|----------|
|                |                 | OS=Homo sapiens GN=DAK PE=4 SV=1                                                              |             |    |    |    |      |         |       |      |       |       |       |       |        |         |          |
| Q05CP8         | CCDC6           | CCDC6 protein (Fragment)<br>OS=Homo sapiens GN=CCDC6<br>PE=2 SV=1                             | 33.23353293 | 12 | 18 | 10 | 334  | 38.14   | 9.39  | 86.2 | 90.7  | 114.5 | 108.6 | 88.45 | 111.55 | 1.26116 | 0.100693 |
| P61956         | SUMO2           | Small ubiquitin-related modifier 2<br>OS=Homo sapiens GN=SUMO2<br>PE=1 SV=3                   | 10.52631579 | 1  | 2  | 1  | 95   | 10.864  | 5.5   | 93.7 | 83.2  | 114.5 | 108.6 | 88.45 | 111.55 | 1.26116 | 0.100693 |
| P40925         | MDH1            | Malate dehydrogenase,<br>cytoplasmic OS=Homo sapiens<br>GN=MDH1 PE=1 SV=4                     | 35.02994012 | 9  | 22 | 9  | 334  | 36.403  | 7.36  | 91   | 85.9  | 118.8 | 104.3 | 88.45 | 111.55 | 1.26116 | 0.100693 |
| Q9UBB4         | ATXN10          | Ataxin-10 OS=Homo sapiens<br>GN=ATXN10 PE=1 SV=1                                              | 28.63157895 | 13 | 15 | 13 | 475  | 53.455  | 5.25  | 85.5 | 91.4  | 119   | 104.1 | 88.45 | 111.55 | 1.26116 | 0.100693 |
| A0A0U1R<br>QMO |                 | Uncharacterized protein OS=Homo<br>sapiens PE=4 SV=1                                          | 16.37931034 | 1  | 1  | 1  | 116  | 12.657  | 10.24 | 86.9 | 90    | 107.8 | 115.2 | 88.45 | 111.5  | 1.2606  | 0.101403 |
| A0A0D9S<br>G79 | UBAP1           | Ubiquitin-associated protein 1<br>(Fragment) OS=Homo sapiens<br>GN=UBAP1 PE=1 SV=1            | 3.409090909 | 1  | 1  | 1  | 528  | 57.818  | 5.57  | 83.7 | 93.3  | 109.6 | 113.4 | 88.5  | 111.5  | 1.25989 | 0.102304 |
| B3KS98         | EIF3H           | Eukaryotic translation initiation<br>factor 3 subunit H OS=Homo<br>sapiens GN=EIF3H PE=1 SV=1 | 16.12021858 | 5  | 7  | 5  | 366  | 41.555  | 7.33  | 95.5 | 81.5  | 114.8 | 108.2 | 88.5  | 111.5  | 1.25989 | 0.102304 |
| Q53GG0         |                 | Epithelial protein lost in neoplasm<br>beta variant (Fragment) OS=Homo<br>sapiens PE=2 SV=1   | 31.75230567 | 24 | 42 | 24 | 759  | 85.201  | 6.84  | 93.3 | 83.7  | 116.8 | 106.2 | 88.5  | 111.5  | 1.25989 | 0.102304 |
| D6W5V3         | hCG_20<br>24112 | HCG2024112, isoform CRA_c<br>(Fragment) OS=Homo sapiens<br>GN=hCG_2024112 PE=4 SV=1           | 2.671755725 | 1  | 1  | 1  | 262  | 28.888  | 8.07  | 74.3 | 102.7 | 112.1 | 110.9 | 88.5  | 111.5  | 1.25989 | 0.102304 |
| Q06830         | PRDX1           | Peroxisiredoxin-1 OS=Homo<br>sapiens GN=PRDX1 PE=1 SV=1                                       | 78.3919598  | 14 | 44 | 11 | 199  | 22.096  | 8.13  | 87.7 | 89.4  | 109.7 | 113.3 | 88.55 | 111.5  | 1.25918 | 0.10321  |
| Q969F9         | HPS3            | Hermansky-Pudlak syndrome 3<br>protein OS=Homo sapiens<br>GN=HPS3 PE=1 SV=1                   | 2.788844622 | 2  | 2  | 2  | 1004 | 113.662 | 6.43  | 84.8 | 92.3  | 117.4 | 105.5 | 88.55 | 111.45 | 1.25861 | 0.103935 |



|            |         |                                                                                                  |             |    |    |    |     |         |      |      |       |       |       |       |        |         |          |
|------------|---------|--------------------------------------------------------------------------------------------------|-------------|----|----|----|-----|---------|------|------|-------|-------|-------|-------|--------|---------|----------|
| Q96KB5     | PBK     | Lymphokine-activated killer T-cell-originated protein kinase<br>OS=Homo sapiens GN=PBK PE=1 SV=3 | 12.11180124 | 3  | 4  | 3  | 322 | 36.062  | 5.12 | 82.2 | 94.9  | 114.5 | 108.4 | 88.55 | 111.45 | 1.25861 | 0.103935 |
| A0A024R001 | TMEM14C | Transmembrane protein 14C, isoform CRA_a OS=Homo sapiens GN=TMEM14C PE=4 SV=1                    | 8.928571429 | 1  | 2  | 1  | 112 | 11.557  | 9.88 | 64.7 | 112.4 | 107   | 115.8 | 88.55 | 111.4  | 1.25805 | 0.104664 |
| A0A024R9Y7 | MAGED2  | Melanoma antigen family D, 2, isoform CRA_a OS=Homo sapiens GN=MAGED2 PE=4 SV=1                  | 21.12211221 | 14 | 18 | 14 | 606 | 64.914  | 9.32 | 88.9 | 88.3  | 122.8 | 100.1 | 88.6  | 111.45 | 1.2579  | 0.104853 |
| A4D1L5     | UBE2H   | Ubiquitin-conjugating enzyme E2H (UBC8 homolog, yeast) OS=Homo sapiens GN=UBE2H PE=2 SV=1        | 17.4863388  | 3  | 4  | 3  | 183 | 20.642  | 4.67 | 86.7 | 90.5  | 114.2 | 108.6 | 88.6  | 111.4  | 1.25734 | 0.105587 |
| Q9BTE1     | DCTN5   | Dynactin subunit 5 OS=Homo sapiens GN=DCTN5 PE=1 SV=1                                            | 5.494505495 | 1  | 1  | 1  | 182 | 20.113  | 8.02 | 94.3 | 82.9  | 110.6 | 112.2 | 88.6  | 111.4  | 1.25734 | 0.105587 |
| P25789     | PSMA4   | Proteasome subunit alpha type-4 OS=Homo sapiens GN=PSMA4 PE=1 SV=1                               | 48.27586207 | 11 | 23 | 11 | 261 | 29.465  | 7.72 | 93.9 | 83.3  | 117.4 | 105.4 | 88.6  | 111.4  | 1.25734 | 0.105587 |
| A8KA30     |         | Oxysterol-binding protein OS=Homo sapiens PE=2 SV=1                                              | 1.789473684 | 1  | 1  | 1  | 950 | 108.37  | 6.33 | 92.7 | 84.5  | 117.4 | 105.4 | 88.6  | 111.4  | 1.25734 | 0.105587 |
| Q9H6T3     | RPAP3   | RNA polymerase II-associated protein 3 OS=Homo sapiens GN=RPAP3 PE=1 SV=2                        | 8.721804511 | 4  | 4  | 4  | 665 | 75.672  | 6.84 | 92.3 | 84.9  | 115.4 | 107.4 | 88.6  | 111.4  | 1.25734 | 0.105587 |
| B1Q2B0     | URCC5   | URCC5 OS=Homo sapiens GN=URCC5 PE=2 SV=1                                                         | 15.80680571 | 11 | 13 | 11 | 911 | 101.244 | 8.43 | 83.2 | 94    | 110.7 | 112.1 | 88.6  | 111.4  | 1.25734 | 0.105587 |
| P56937     | HSD17B7 | 3-keto-steroid reductase OS=Homo sapiens GN=HSD17B7 PE=1 SV=1                                    | 20.82111437 | 6  | 13 | 6  | 341 | 38.182  | 8.1  | 91.1 | 86.1  | 112.8 | 109.9 | 88.6  | 111.35 | 1.25677 | 0.106325 |
| Q9HAB3     | SLC52A2 | Solute carrier family 52, riboflavin transporter, member 2 OS=Homo sapiens GN=SLC52A2 PE=1 SV=1  | 1.797752809 | 1  | 1  | 1  | 445 | 45.747  | 7.15 | 95.9 | 81.4  | 114.5 | 108.3 | 88.65 | 111.4  | 1.25663 | 0.106515 |
| Q9HD26     | GOPC    | Golgi-associated PDZ and coiled-coil motif-containing protein                                    | 4.329004329 | 2  | 2  | 2  | 462 | 50.489  | 5.92 | 84.9 | 92.4  | 115.8 | 107   | 88.65 | 111.4  | 1.25663 | 0.106515 |

|                |           |                                                                                                   |             |    |    |    |      |         |      |      |      |       |       |       |        |         |          |  |
|----------------|-----------|---------------------------------------------------------------------------------------------------|-------------|----|----|----|------|---------|------|------|------|-------|-------|-------|--------|---------|----------|--|
|                |           | OS=Homo sapiens GN=GOPC<br>PE=1 SV=1                                                              |             |    |    |    |      |         |      |      |      |       |       |       |        |         |          |  |
| O60925         | PFDN1     | Prefoldin subunit 1 OS=Homo sapiens GN=PFDN1 PE=1 SV=2                                            | 22.13114754 | 3  | 3  | 3  | 122  | 14.202  | 6.81 | 91.8 | 85.5 | 114.6 | 108.1 | 88.65 | 111.35 | 1.25606 | 0.107259 |  |
| Q15075         | EEA1      | Early endosome antigen 1 OS=Homo sapiens GN=EEA1 PE=1 SV=2                                        | 17.00921332 | 20 | 24 | 20 | 1411 | 162.367 | 5.68 | 90.6 | 86.7 | 115.7 | 107   | 88.65 | 111.35 | 1.25606 | 0.107259 |  |
| Q8N543         | OGFOD1    | Prolyl 3-hydroxylase OGFOD1 OS=Homo sapiens GN=OGFOD1 PE=1 SV=1                                   | 9.778597786 | 4  | 4  | 4  | 542  | 63.206  | 5.11 | 88.3 | 89   | 114.6 | 108.1 | 88.65 | 111.35 | 1.25606 | 0.107259 |  |
| Q53G42         |           | mRNA decapping enzyme variant (Fragment) OS=Homo sapiens PE=2 SV=1                                | 18.99109792 | 5  | 6  | 5  | 337  | 38.586  | 6.38 | 94.5 | 82.8 | 116.3 | 106.4 | 88.65 | 111.35 | 1.25606 | 0.107259 |  |
| Q6P996         | PDXDC1    | Pyridoxal-dependent decarboxylase domain-containing protein 1 OS=Homo sapiens GN=PDXDC1 PE=1 SV=2 | 18.90862944 | 11 | 17 | 11 | 788  | 86.652  | 5.38 | 89.7 | 87.6 | 117.5 | 105.2 | 88.65 | 111.35 | 1.25606 | 0.107259 |  |
| P02751         | FN1       | Fibronectin OS=Homo sapiens GN=FN1 PE=1 SV=4                                                      | 6.621961442 | 12 | 17 | 12 | 2386 | 262.46  | 5.71 | 85.5 | 91.8 | 100   | 122.7 | 88.65 | 111.35 | 1.25606 | 0.107259 |  |
| A0A140V<br>KF3 |           | Testis tissue sperm-binding protein Li 70n OS=Homo sapiens PE=2 SV=1                              | 7.894736842 | 3  | 4  | 3  | 418  | 46.283  | 6.38 | 84.1 | 93.2 | 100.2 | 122.5 | 88.65 | 111.35 | 1.25606 | 0.107259 |  |
| O60825         | PFKFB2    | 6-phosphofructo-2-kinase/fructose-2,6-bisphosphatase 2 OS=Homo sapiens GN=PFKFB2 PE=1 SV=2        | 9.702970297 | 4  | 7  | 4  | 505  | 58.44   | 8.38 | 90.3 | 87   | 117.4 | 105.2 | 88.65 | 111.3  | 1.2555  | 0.108007 |  |
| Q5T040         | FAM120AOS | Uncharacterized protein FAM120AOS (Fragment) OS=Homo sapiens GN=FAM120AOS PE=4 SV=1               | 10.60606061 | 1  | 1  | 1  | 66   | 7.1     | 10.7 | 84.4 | 92.9 | 122.7 | 99.9  | 88.65 | 111.3  | 1.2555  | 0.108007 |  |
| P55786         | NPEPPS    | Puromycin-sensitive aminopeptidase OS=Homo sapiens GN=NPEPPS PE=1 SV=2                            | 19.26006529 | 14 | 20 | 14 | 919  | 103.211 | 5.72 | 94.5 | 82.9 | 119.2 | 103.4 | 88.7  | 111.3  | 1.25479 | 0.108952 |  |

|                |               |                                                                                                                                                   |             |    |    |   |      |         |      |      |      |       |       |       |        |         |          |
|----------------|---------------|---------------------------------------------------------------------------------------------------------------------------------------------------|-------------|----|----|---|------|---------|------|------|------|-------|-------|-------|--------|---------|----------|
| A4D2M9         | INSIG1        | Insulin-induced gene protein<br>OS=Homo sapiens GN=INSIG1<br>PE=3 SV=1                                                                            | 2.121212121 | 1  | 1  | 1 | 330  | 36.429  | 9.04 | 93.9 | 83.5 | 106.9 | 115.7 | 88.7  | 111.3  | 1.25479 | 0.108952 |
| Q8TF05         | PPP4R1        | Serine/threonine-protein<br>phosphatase 4 regulatory subunit 1<br>OS=Homo sapiens GN=PPP4R1<br>PE=1 SV=1                                          | 0.736842105 | 1  | 1  | 1 | 950  | 106.936 | 4.77 | 91.6 | 85.8 | 118.2 | 104.4 | 88.7  | 111.3  | 1.25479 | 0.108952 |
| A0A024Q<br>YX0 | EBP           | Emopamil binding protein<br>OS=Homo sapiens GN=EBP PE=2<br>SV=1                                                                                   | 16.95652174 | 4  | 19 | 4 | 230  | 26.336  | 7.9  | 82.6 | 94.8 | 117.5 | 105.1 | 88.7  | 111.3  | 1.25479 | 0.108952 |
| Q14240         | EIF4A2        | Eukaryotic initiation factor 4A-II<br>OS=Homo sapiens GN=EIF4A2<br>PE=1 SV=2                                                                      | 25.06142506 | 11 | 22 | 3 | 407  | 46.373  | 5.48 | 89.1 | 88.3 | 119.8 | 102.7 | 88.7  | 111.25 | 1.25423 | 0.10971  |
| A0A024R0<br>D2 | hCG_38<br>636 | AP complex subunit beta<br>OS=Homo sapiens<br>GN=hCG_38636 PE=3 SV=1                                                                              | 2.165087957 | 1  | 1  | 1 | 739  | 83.206  | 5.86 | 86.6 | 90.9 | 109.4 | 113.2 | 88.75 | 111.3  | 1.25408 | 0.109903 |
| B2RE31         |               | cDNA, FLJ96896 OS=Homo<br>sapiens PE=2 SV=1                                                                                                       | 2.976190476 | 1  | 2  | 1 | 504  | 56.41   | 8.81 | 93.4 | 84.1 | 110.7 | 111.8 | 88.75 | 111.25 | 1.25352 | 0.110666 |
| B2R8K8         |               | cDNA, FLJ93949, highly similar to<br>Homo sapiens NIMA (never in<br>mitosis gene a)-related kinase 7<br>(NEK7), mRNA OS=Homo sapiens<br>PE=2 SV=1 | 3.311258278 | 1  | 1  | 1 | 302  | 34.514  | 8.25 | 93.2 | 84.3 | 113.2 | 109.3 | 88.75 | 111.25 | 1.25352 | 0.110666 |
| P48507         | GCLM          | Glutamate--cysteine ligase<br>regulatory subunit OS=Homo<br>sapiens GN=GCLM PE=1 SV=1                                                             | 18.61313869 | 4  | 4  | 4 | 274  | 30.708  | 6.02 | 87.7 | 89.8 | 110.5 | 112   | 88.75 | 111.25 | 1.25352 | 0.110666 |
| Q68CZ1         | RPGRIP<br>1L  | Protein fantom OS=Homo sapiens<br>GN=RPGRIP1L PE=1 SV=2                                                                                           | 0.532319392 | 1  | 1  | 1 | 1315 | 151.107 | 5.35 | 97.2 | 80.3 | 124.1 | 98.4  | 88.75 | 111.25 | 1.25352 | 0.110666 |
| A0A024R7<br>55 | CALU          | Calumenin, isoform CRA_a<br>OS=Homo sapiens GN=CALU<br>PE=4 SV=1                                                                                  | 54.28571429 | 16 | 50 | 2 | 315  | 37.111  | 4.59 | 89.3 | 88.2 | 118.7 | 103.8 | 88.75 | 111.25 | 1.25352 | 0.110666 |

|                |              |                                                                                                                 |             |    |    |    |      |         |      |      |      |       |       |       |        |         |          |
|----------------|--------------|-----------------------------------------------------------------------------------------------------------------|-------------|----|----|----|------|---------|------|------|------|-------|-------|-------|--------|---------|----------|
| P35527         | KRT9         | Keratin, type I cytoskeletal 9<br>OS=Homo sapiens GN=KRT9<br>PE=1 SV=3                                          | 32.58426966 | 17 | 28 | 16 | 623  | 62.027  | 5.24 | 81.6 | 95.9 | 127.6 | 94.9  | 88.75 | 111.25 | 1.25352 | 0.110666 |
| A0A0S2Z4<br>55 | SERPINI<br>1 | Serpin peptidase inhibitor clade I<br>member 1 isoform 1 (Fragment)<br>OS=Homo sapiens GN=SERPINI1<br>PE=2 SV=1 | 2.926829268 | 1  | 1  | 1  | 410  | 46.397  | 4.91 | 88.5 | 89.1 | 107.3 | 115.1 | 88.8  | 111.2  | 1.25225 | 0.112401 |
| Q7Z4Q2         | HEATR3       | HEAT repeat-containing protein 3<br>OS=Homo sapiens GN=HEATR3<br>PE=1 SV=2                                      | 6.617647059 | 4  | 4  | 4  | 680  | 74.535  | 5.11 | 95.4 | 82.2 | 103.2 | 119.2 | 88.8  | 111.2  | 1.25225 | 0.112401 |
| Q6XQN6         | NAPRT        | Nicotinate<br>phosphoribosyltransferase<br>OS=Homo sapiens GN=NAPRT<br>PE=1 SV=2                                | 7.620817844 | 3  | 4  | 3  | 538  | 57.542  | 5.68 | 89.9 | 87.7 | 119.6 | 102.8 | 88.8  | 111.2  | 1.25225 | 0.112401 |
| Q9UJY1         | HSPB8        | Heat shock protein beta-8<br>OS=Homo sapiens GN=HSPB8<br>PE=1 SV=1                                              | 12.24489796 | 3  | 5  | 3  | 196  | 21.591  | 5.12 | 78.3 | 99.3 | 108.2 | 114.2 | 88.8  | 111.2  | 1.25225 | 0.112401 |
| Q16658         | FSCN1        | Fascin OS=Homo sapiens<br>GN=FSCN1 PE=1 SV=3                                                                    | 42.39350913 | 17 | 33 | 17 | 493  | 54.496  | 7.24 | 91.2 | 86.5 | 106.7 | 115.7 | 88.85 | 111.2  | 1.25155 | 0.113374 |
| P39687         | ANP32A       | Acidic leucine-rich nuclear<br>phosphoprotein 32 family member<br>A OS=Homo sapiens GN=ANP32A<br>PE=1 SV=1      | 31.3253012  | 9  | 20 | 4  | 249  | 28.568  | 4.09 | 88.2 | 89.5 | 119.5 | 102.9 | 88.85 | 111.2  | 1.25155 | 0.113374 |
| Q9NWW4         | C1orf12<br>3 | UPF0587 protein C1orf123<br>OS=Homo sapiens GN=C1orf123<br>PE=1 SV=1                                            | 10          | 2  | 2  | 2  | 160  | 18.037  | 5.01 | 87   | 90.7 | 117.1 | 105.2 | 88.85 | 111.15 | 1.25098 | 0.114157 |
| Q07889         | SOS1         | Son of sevenless homolog 1<br>OS=Homo sapiens GN=SOS1<br>PE=1 SV=1                                              | 0.525131283 | 1  | 1  | 1  | 1333 | 152.368 | 6.84 | 80.3 | 97.4 | 89.3  | 133   | 88.85 | 111.15 | 1.25098 | 0.114157 |
| P57081         | WDR4         | tRNA (guanine-N(7)-)<br>methyltransferase non-catalytic<br>subunit WDR4 OS=Homo sapiens<br>GN=WDR4 PE=1 SV=2    | 6.796116505 | 2  | 5  | 2  | 412  | 45.461  | 7.11 | 88.2 | 89.5 | 114.9 | 107.3 | 88.85 | 111.1  | 1.25042 | 0.114944 |

|             |       |                                                                                                                                                                 |             |    |    |    |     |        |      |       |      |       |       |       |        |         |          |
|-------------|-------|-----------------------------------------------------------------------------------------------------------------------------------------------------------------|-------------|----|----|----|-----|--------|------|-------|------|-------|-------|-------|--------|---------|----------|
| Q96L92      | SNX27 | Sorting nexin-27 OS=Homo sapiens GN=SNX27 PE=1 SV=2                                                                                                             | 3.512014787 | 2  | 3  | 2  | 541 | 61.226 | 6.49 | 100.1 | 77.7 | 115.6 | 106.7 | 88.9  | 111.15 | 1.25028 | 0.115142 |
| B2R665      |       | cDNA, FLJ92810, highly similar to Homo sapiens protein phosphatase 1G (formerly 2C), magnesium-dependent, gamma isoform (PPM1G), mRNA OS=Homo sapiens PE=2 SV=1 | 28.38827839 | 11 | 15 | 11 | 546 | 59.205 | 4.36 | 92.2  | 85.6 | 117.8 | 104.5 | 88.9  | 111.15 | 1.25028 | 0.115142 |
| P26639      | TARS  | Threonine--tRNA ligase, cytoplasmic OS=Homo sapiens GN=TARS PE=1 SV=3                                                                                           | 41.35546335 | 29 | 53 | 29 | 723 | 83.382 | 6.67 | 91.9  | 85.9 | 113.6 | 108.6 | 88.9  | 111.1  | 1.24972 | 0.115934 |
| A0A140VJ F4 |       | Biliverdin reductase A OS=Homo sapiens PE=2 SV=1                                                                                                                | 14.52702703 | 4  | 6  | 4  | 296 | 33.407 | 6.44 | 88.7  | 89.1 | 111.1 | 111.1 | 88.9  | 111.1  | 1.24972 | 0.115934 |
| O00273      | DFFA  | DNA fragmentation factor subunit alpha OS=Homo sapiens GN=DFFA PE=1 SV=1                                                                                        | 16.918429   | 4  | 4  | 4  | 331 | 36.5   | 4.79 | 88.2  | 89.6 | 111.3 | 110.9 | 88.9  | 111.1  | 1.24972 | 0.115934 |
| J3QLU8      | PEMT  | Phosphatidylethanolamine N-methyltransferase OS=Homo sapiens GN=PEMT PE=4 SV=1                                                                                  | 9.278350515 | 1  | 1  | 1  | 97  | 10.228 | 5.94 | 82.2  | 95.6 | 106   | 116.2 | 88.9  | 111.1  | 1.24972 | 0.115934 |
| Q53HV2      |       | Chaperonin containing TCP1, subunit 7 (Eta) variant (Fragment) OS=Homo sapiens PE=2 SV=1                                                                        | 46.40883978 | 21 | 55 | 21 | 543 | 59.303 | 7.65 | 91.8  | 86.1 | 113.6 | 108.6 | 88.95 | 111.1  | 1.24902 | 0.116931 |
| Q96D71      | REPS1 | RalBP1-associated Eps domain-containing protein 1 OS=Homo sapiens GN=REPS1 PE=1 SV=3                                                                            | 3.391959799 | 2  | 2  | 2  | 796 | 86.609 | 5.69 | 87.3  | 90.6 | 110.1 | 112.1 | 88.95 | 111.1  | 1.24902 | 0.116931 |
| Q9HCN4      | GPN1  | GPN-loop GTPase 1 OS=Homo sapiens GN=GPN1 PE=1 SV=1                                                                                                             | 7.754010695 | 2  | 2  | 2  | 374 | 41.714 | 4.92 | 88.7  | 89.2 | 95.8  | 126.4 | 88.95 | 111.1  | 1.24902 | 0.116931 |
| K7EM18      | EIF1  | Eukaryotic translation initiation factor 1 OS=Homo sapiens GN=EIF1 PE=1 SV=1                                                                                    | 59.50413223 | 5  | 13 | 1  | 121 | 13.599 | 7.9  | 99.2  | 78.7 | 105.8 | 116.3 | 88.95 | 111.05 | 1.24845 | 0.117733 |
| A0A024R9 K2 | BAHD1 | Bromo adjacent homology domain containing 1, isoform CRA_a                                                                                                      | 1.153846154 | 1  | 1  | 1  | 780 | 84.599 | 9.07 | 93.1  | 84.8 | 126.6 | 95.5  | 88.95 | 111.05 | 1.24845 | 0.117733 |

|                |              |                                                                                              |             |    |    |    |     |        |      |      |      |       |       |       |        |         |          |
|----------------|--------------|----------------------------------------------------------------------------------------------|-------------|----|----|----|-----|--------|------|------|------|-------|-------|-------|--------|---------|----------|
|                |              | OS=Homo sapiens GN=BAHD1<br>PE=4 SV=1                                                        |             |    |    |    |     |        |      |      |      |       |       |       |        |         |          |
| P49137         | MAPKA<br>PK2 | MAP kinase-activated protein<br>kinase 2 OS=Homo sapiens<br>GN=MAPKAPK2 PE=1 SV=1            | 7.75        | 3  | 3  | 3  | 400 | 45.538 | 8.68 | 86.4 | 91.5 | 112.4 | 109.6 | 88.95 | 111    | 1.24789 | 0.118541 |
| B2R6D4         |              | Phosphomannomutase OS=Homo<br>sapiens PE=2 SV=1                                              | 19.91869919 | 4  | 4  | 4  | 246 | 28.036 | 6.77 | 89.1 | 88.9 | 115   | 107   | 89    | 111    | 1.24719 | 0.119554 |
| A8K7U3         |              | cDNA FLJ77788 OS=Homo<br>sapiens PE=2 SV=1                                                   | 3.685503686 | 1  | 1  | 1  | 407 | 46.973 | 8.91 | 95   | 83   | 115.6 | 106.4 | 89    | 111    | 1.24719 | 0.119554 |
| P49915         | GMPS         | GMP synthase [glutamine-<br>hydrolyzing] OS=Homo sapiens<br>GN=GMPS PE=1 SV=1                | 35.4978355  | 21 | 31 | 21 | 693 | 76.667 | 6.87 | 93.5 | 84.5 | 115.9 | 106.1 | 89    | 111    | 1.24719 | 0.119554 |
| A0A140VJ<br>Z4 |              | Ubiquitin carboxyl-terminal<br>hydrolase OS=Homo sapiens<br>PE=2 SV=1                        | 10          | 2  | 2  | 2  | 230 | 26.166 | 4.92 | 89.4 | 88.6 | 116.6 | 105.4 | 89    | 111    | 1.24719 | 0.119554 |
| Q05209         | PTPN12       | Tyrosine-protein phosphatase non-<br>receptor type 12 OS=Homo<br>sapiens GN=PTPN12 PE=1 SV=3 | 3.333333333 | 2  | 2  | 2  | 780 | 88.051 | 5.62 | 86.7 | 91.3 | 117.4 | 104.6 | 89    | 111    | 1.24719 | 0.119554 |
| Q15785         | TOMM3<br>4   | Mitochondrial import receptor<br>subunit TOM34 OS=Homo sapiens<br>GN=TOMM34 PE=1 SV=2        | 20.38834951 | 5  | 5  | 5  | 309 | 34.538 | 8.98 | 85.5 | 92.5 | 118.5 | 103.5 | 89    | 111    | 1.24719 | 0.119554 |
| B2R5M8         |              | Isocitrate dehydrogenase [NADP]<br>OS=Homo sapiens PE=2 SV=1                                 | 44.20289855 | 17 | 27 | 16 | 414 | 46.619 | 7.01 | 92.4 | 85.6 | 115.9 | 106   | 89    | 110.95 | 1.24663 | 0.120371 |
| O95861         | BPNT1        | 3'(2'),5'-bisphosphate nucleotidase<br>1 OS=Homo sapiens GN=BPNT1<br>PE=1 SV=1               | 11.68831169 | 3  | 4  | 3  | 308 | 33.371 | 5.69 | 85.4 | 92.6 | 117.2 | 104.7 | 89    | 110.95 | 1.24663 | 0.120371 |
| Q86SZ2         | TRAPP<br>C6B | Trafficking protein particle complex<br>subunit 6B OS=Homo sapiens<br>GN=TRAPPC6B PE=1 SV=1  | 8.860759494 | 1  | 1  | 1  | 158 | 17.971 | 8.68 | 84.3 | 93.7 | 107.2 | 114.7 | 89    | 110.95 | 1.24663 | 0.120371 |
| Q9BY32         | ITPA         | Inosine triphosphate<br>pyrophosphatase OS=Homo<br>sapiens GN=ITPA PE=1 SV=2                 | 12.37113402 | 2  | 2  | 2  | 194 | 21.432 | 5.66 | 92.9 | 85.2 | 120.5 | 101.5 | 89.05 | 111    | 1.24649 | 0.120573 |

|        |               |                                                                                                                        |             |    |    |    |      |         |      |      |      |       |       |       |        |         |          |
|--------|---------------|------------------------------------------------------------------------------------------------------------------------|-------------|----|----|----|------|---------|------|------|------|-------|-------|-------|--------|---------|----------|
| P46926 | GNPDA<br>1    | Glucosamine-6-phosphate<br>isomerase 1 OS=Homo sapiens<br>GN=GNPDA1 PE=1 SV=1                                          | 16.60899654 | 4  | 6  | 4  | 289  | 32.648  | 6.92 | 91.4 | 86.7 | 112.4 | 109.5 | 89.05 | 110.95 | 1.24593 | 0.121396 |
| Q9HBM1 | SPC25         | Kinetochores protein Spc25<br>OS=Homo sapiens GN=SPC25<br>PE=1 SV=1                                                    | 4.910714286 | 1  | 1  | 1  | 224  | 26.137  | 8    | 92.4 | 85.7 | 117   | 104.9 | 89.05 | 110.95 | 1.24593 | 0.121396 |
| Q9UHV9 | PFDN2         | Prefoldin subunit 2 OS=Homo<br>sapiens GN=PFDN2 PE=1 SV=1                                                              | 29.22077922 | 4  | 5  | 4  | 154  | 16.638  | 6.58 | 91.2 | 86.9 | 119   | 102.9 | 89.05 | 110.95 | 1.24593 | 0.121396 |
| P09758 | TACSTD<br>2   | Tumor-associated calcium signal<br>transducer 2 OS=Homo sapiens<br>GN=TACSTD2 PE=1 SV=3                                | 11.14551084 | 3  | 3  | 3  | 323  | 35.687  | 8.87 | 86.4 | 91.7 | 116.2 | 105.7 | 89.05 | 110.95 | 1.24593 | 0.121396 |
| Q8N2H3 | PYROX<br>D2   | Pyridine nucleotide-disulfide<br>oxidoreductase domain-containing<br>protein 2 OS=Homo sapiens<br>GN=PYROXD2 PE=1 SV=2 | 4.475043029 | 2  | 2  | 2  | 581  | 63.027  | 6.95 | 93.8 | 84.3 | 120.1 | 101.7 | 89.05 | 110.9  | 1.24537 | 0.122224 |
| O15371 | EIF3D         | Eukaryotic translation initiation<br>factor 3 subunit D OS=Homo<br>sapiens GN=EIF3D PE=1 SV=1                          | 39.7810219  | 14 | 23 | 14 | 548  | 63.932  | 6.05 | 93.2 | 85   | 112   | 109.8 | 89.1  | 110.9  | 1.24467 | 0.12326  |
| Q8IZ83 | ALDH16<br>A1  | Aldehyde dehydrogenase family 16<br>member A1 OS=Homo sapiens<br>GN=ALDH16A1 PE=1 SV=2                                 | 10.8478803  | 7  | 9  | 7  | 802  | 85.074  | 6.79 | 92.3 | 85.9 | 114.5 | 107.3 | 89.1  | 110.9  | 1.24467 | 0.12326  |
| O75146 | HIP1R         | Huntingtin-interacting protein 1-<br>related protein OS=Homo sapiens<br>GN=HIP1R PE=1 SV=2                             | 6.27340824  | 6  | 7  | 6  | 1068 | 119.315 | 6.67 | 92.1 | 86.1 | 111.9 | 109.9 | 89.1  | 110.9  | 1.24467 | 0.12326  |
| Q96IZ0 | PAWR          | PRKC apoptosis WT1 regulator<br>protein OS=Homo sapiens<br>GN=PAWR PE=1 SV=1                                           | 12.94117647 | 3  | 5  | 3  | 340  | 36.545  | 5.41 | 87.7 | 90.5 | 110.6 | 111.2 | 89.1  | 110.9  | 1.24467 | 0.12326  |
| D6W4Z6 | hCG_23<br>833 | HCG23833, isoform CRA_b<br>OS=Homo sapiens<br>GN=hCG_23833 PE=4 SV=1                                                   | 22.27171492 | 7  | 10 | 7  | 449  | 51.044  | 6.57 | 84.6 | 93.6 | 116.3 | 105.5 | 89.1  | 110.9  | 1.24467 | 0.12326  |
| Q14232 | EIF2B1        | Translation initiation factor eIF-2B<br>subunit alpha OS=Homo sapiens<br>GN=EIF2B1 PE=1 SV=1                           | 27.21311475 | 7  | 8  | 7  | 305  | 33.691  | 7.33 | 89.3 | 88.9 | 109.3 | 112.4 | 89.1  | 110.85 | 1.24411 | 0.124098 |

|            |               |                                                                                                                                                  |             |    |    |    |      |         |      |      |      |       |       |       |        |         |          |
|------------|---------------|--------------------------------------------------------------------------------------------------------------------------------------------------|-------------|----|----|----|------|---------|------|------|------|-------|-------|-------|--------|---------|----------|
| Q6MZT3     | DKFZp686C1054 | Putative uncharacterized protein<br>DKFZp686C1054 OS=Homo sapiens GN=DKFZp686C1054 PE=2 SV=1                                                     | 13.2118451  | 5  | 5  | 5  | 439  | 48.46   | 8.92 | 94.8 | 83.5 | 113.2 | 108.6 | 89.15 | 110.9  | 1.24397 | 0.124303 |
| P14735     | IDE           | Insulin-degrading enzyme<br>OS=Homo sapiens GN=IDE PE=1 SV=4                                                                                     | 17.66437684 | 16 | 22 | 16 | 1019 | 117.893 | 6.61 | 92.3 | 86   | 114.4 | 107.3 | 89.15 | 110.85 | 1.24341 | 0.125147 |
| Q13596     | SNX1          | Sorting nexin-1 OS=Homo sapiens GN=SNX1 PE=1 SV=3                                                                                                | 20.30651341 | 9  | 12 | 7  | 522  | 59.033  | 5.15 | 88.6 | 89.7 | 113.7 | 108   | 89.15 | 110.85 | 1.24341 | 0.125147 |
| A0A0J9YXC7 | LIMS4         | LIM and senescent cell antigen-like-containing domain protein 3<br>OS=Homo sapiens GN=LIMS4 PE=1 SV=1                                            | 3.015075377 | 1  | 2  | 1  | 398  | 45.694  | 7.88 | 92.2 | 86.1 | 118.5 | 103.2 | 89.15 | 110.85 | 1.24341 | 0.125147 |
| Q8WUP2     | FBLIM1        | Filamin-binding LIM protein 1<br>OS=Homo sapiens GN=FBLIM1 PE=1 SV=2                                                                             | 2.680965147 | 1  | 1  | 1  | 373  | 40.643  | 6.02 | 82.1 | 96.2 | 114.8 | 106.9 | 89.15 | 110.85 | 1.24341 | 0.125147 |
| H7BY58     | PCMT1         | Protein-L-isoaspartate O-methyltransferase OS=Homo sapiens GN=PCMT1 PE=1 SV=1                                                                    | 31.11888112 | 7  | 8  | 7  | 286  | 30.339  | 6.73 | 85.8 | 92.6 | 112.3 | 109.4 | 89.2  | 110.85 | 1.24271 | 0.126201 |
| A8K7F6     |               | cDNA FLJ78244, highly similar to Homo sapiens eukaryotic translation initiation factor 4A, isoform 1 (EIF4A1), mRNA<br>OS=Homo sapiens PE=2 SV=1 | 43.10344828 | 16 | 40 | 8  | 406  | 46.093  | 5.48 | 92.2 | 86.2 | 116.5 | 105.2 | 89.2  | 110.85 | 1.24271 | 0.126201 |
| P55263     | ADK           | Adenosine kinase OS=Homo sapiens GN=ADK PE=1 SV=2                                                                                                | 9.392265193 | 3  | 3  | 3  | 362  | 40.52   | 6.7  | 91.9 | 86.5 | 115.2 | 106.4 | 89.2  | 110.8  | 1.24215 | 0.127055 |
| Q59FI4     |               | Importin 4 variant (Fragment)<br>OS=Homo sapiens PE=2 SV=1                                                                                       | 9.57278481  | 10 | 12 | 10 | 1264 | 138.112 | 5.25 | 91   | 87.4 | 106   | 115.6 | 89.2  | 110.8  | 1.24215 | 0.127055 |
| O96007     | MOCS2         | Molybdopterin synthase catalytic subunit OS=Homo sapiens GN=MOCS2 PE=1 SV=1                                                                      | 7.978723404 | 1  | 2  | 1  | 188  | 20.931  | 5.44 | 86.3 | 92.1 | 118   | 103.6 | 89.2  | 110.8  | 1.24215 | 0.127055 |
| A0A087WY96 | SLC6A6        | Transporter OS=Homo sapiens GN=SLC6A6 PE=1 SV=1                                                                                                  | 1.248266297 | 1  | 1  | 1  | 721  | 81.286  | 8.78 | 93.9 | 84.5 | 104.3 | 117.2 | 89.2  | 110.75 | 1.24159 | 0.127914 |



|                |            |                                                                                                             |             |    |    |    |      |         |      |      |      |       |       |       |        |         |          |
|----------------|------------|-------------------------------------------------------------------------------------------------------------|-------------|----|----|----|------|---------|------|------|------|-------|-------|-------|--------|---------|----------|
| Q9H1E3         | NUCKS<br>1 | Nuclear ubiquitous casein and cyclin-dependent kinase substrate<br>1 OS=Homo sapiens<br>GN=NUCKS1 PE=1 SV=1 | 14.81481481 | 4  | 9  | 4  | 243  | 27.28   | 5.08 | 96.9 | 81.6 | 113.4 | 108.2 | 89.25 | 110.8  | 1.24146 | 0.128122 |
| A9UFC0         | CASP14     | Caspase 14 OS=Homo sapiens<br>GN=CASP14 PE=2 SV=1                                                           | 6.198347107 | 1  | 1  | 1  | 242  | 27.649  | 5.34 | 92.3 | 86.2 | 97.4  | 124.2 | 89.25 | 110.8  | 1.24146 | 0.128122 |
| Q9P2S2         | NRXN2      | Neurexin-2 OS=Homo sapiens<br>GN=NRXN2 PE=2 SV=1                                                            | 0.408878505 | 1  | 1  | 1  | 1712 | 184.865 | 5.92 | 86.6 | 91.9 | 111.1 | 110.4 | 89.25 | 110.75 | 1.2409  | 0.128986 |
| A0A024Q<br>YW6 | WDR45      | WD repeat domain 45, isoform CRA_c OS=Homo sapiens<br>GN=WDR45 PE=4 SV=1                                    | 2.69541779  | 1  | 1  | 1  | 371  | 41.018  | 7.24 | 85.2 | 93.3 | 111.4 | 110.1 | 89.25 | 110.75 | 1.2409  | 0.128986 |
| Q9BW83         | IFT27      | Intraflagellar transport protein 27 homolog OS=Homo sapiens<br>GN=IFT27 PE=1 SV=1                           | 8.602150538 | 1  | 1  | 1  | 186  | 20.467  | 5.41 | 91.2 | 87.3 | 116.3 | 105.2 | 89.25 | 110.75 | 1.2409  | 0.128986 |
| A8K9A5         |            | cDNA FLJ78114, highly similar to Homo sapiens thymidylate synthetase, mRNA OS=Homo sapiens PE=2 SV=1        | 12.4600639  | 3  | 3  | 3  | 313  | 35.792  | 7.24 | 83.5 | 95   | 113.1 | 108.4 | 89.25 | 110.75 | 1.2409  | 0.128986 |
| Q53G35         |            | Phosphoglycerate mutase (Fragment) OS=Homo sapiens PE=2 SV=1                                                | 53.1496063  | 10 | 29 | 10 | 254  | 28.814  | 7.18 | 86.1 | 92.4 | 110.6 | 110.8 | 89.25 | 110.7  | 1.24034 | 0.129855 |
| B0YIW6         | ARCN1      | Archain 1, isoform CRA_a OS=Homo sapiens GN=ARCN1 PE=1 SV=1                                                 | 29.71014493 | 15 | 23 | 15 | 552  | 61.587  | 5.85 | 91.6 | 87   | 111.9 | 109.5 | 89.3  | 110.7  | 1.23964 | 0.130939 |
| P53041         | PPP5C      | Serine/threonine-protein phosphatase 5 OS=Homo sapiens<br>GN=PPP5C PE=1 SV=1                                | 12.8256513  | 5  | 7  | 5  | 499  | 56.842  | 6.28 | 89.9 | 88.7 | 114.6 | 106.8 | 89.3  | 110.7  | 1.23964 | 0.130939 |
| B2RA10         | HOMER<br>3 | Homer homolog 3 (Drosophila), isoform CRA_b OS=Homo sapiens<br>GN=HOMER3 PE=1 SV=1                          | 12.46537396 | 3  | 3  | 3  | 361  | 39.881  | 5.55 | 89.1 | 89.5 | 113.4 | 108   | 89.3  | 110.7  | 1.23964 | 0.130939 |
| O95373         | IPO7       | Importin-7 OS=Homo sapiens<br>GN=IPO7 PE=1 SV=1                                                             | 11.65703276 | 10 | 20 | 10 | 1038 | 119.44  | 4.82 | 95.4 | 83.2 | 115.8 | 105.6 | 89.3  | 110.7  | 1.23964 | 0.130939 |

|                |        |                                                                                                           |             |   |    |   |      |         |      |      |      |       |       |       |        |         |          |
|----------------|--------|-----------------------------------------------------------------------------------------------------------|-------------|---|----|---|------|---------|------|------|------|-------|-------|-------|--------|---------|----------|
| B7ZKN5         | UTX    | UTX protein OS=Homo sapiens<br>GN=UTX PE=2 SV=1                                                           | 1.445285616 | 2 | 2  | 2 | 1453 | 159.714 | 7.68 | 91   | 87.6 | 94.2  | 127.2 | 89.3  | 110.7  | 1.23964 | 0.130939 |
| A0A024R9<br>G4 | FAM49B | Family with sequence similarity 49,<br>member B, isoform CRA_a<br>OS=Homo sapiens GN=FAM49B<br>PE=4 SV=1  | 25.30864198 | 6 | 8  | 6 | 324  | 36.725  | 6.06 | 88.7 | 89.9 | 105.2 | 116.2 | 89.3  | 110.7  | 1.23964 | 0.130939 |
| F5H1S1         | PIGB   | Mannosyltransferase OS=Homo<br>sapiens GN=PIGB PE=1 SV=2                                                  | 3.423423423 | 2 | 2  | 2 | 555  | 65.128  | 9.29 | 84.4 | 94.2 | 125.9 | 95.5  | 89.3  | 110.7  | 1.23964 | 0.130939 |
| Q2QL34         | MPV17L | Mpv17-like protein OS=Homo<br>sapiens GN=MPV17L PE=1 SV=1                                                 | 5.102040816 | 1 | 1  | 1 | 196  | 22.101  | 9.89 | 83.1 | 95.5 | 110.3 | 111.1 | 89.3  | 110.7  | 1.23964 | 0.130939 |
| Q9Y4A1         |        | Talin-related protein (Fragment)<br>OS=Homo sapiens PE=2 SV=1                                             | 7.179487179 | 2 | 3  | 1 | 195  | 20.157  | 4.81 | 87.4 | 91.3 | 113.3 | 108.1 | 89.35 | 110.7  | 1.23895 | 0.13203  |
| A0A0S2Z3<br>81 | ADA    | Adenosine deaminase isoform 1<br>(Fragment) OS=Homo sapiens<br>GN=ADA PE=2 SV=1                           | 4.132231405 | 2 | 2  | 2 | 363  | 40.739  | 5.95 | 93.9 | 84.8 | 112.6 | 108.7 | 89.35 | 110.65 | 1.23839 | 0.132915 |
| Q15181         | PPA1   | Inorganic pyrophosphatase<br>OS=Homo sapiens GN=PPA1<br>PE=1 SV=2                                         | 32.1799308  | 8 | 15 | 7 | 289  | 32.639  | 5.86 | 92.4 | 86.3 | 114.4 | 106.9 | 89.35 | 110.65 | 1.23839 | 0.132915 |
| A0A0S2Z4<br>97 | PEX19  | Peroxisomal biogenesis factor 19<br>isoform 1 (Fragment) OS=Homo<br>sapiens GN=PEX19 PE=2 SV=1            | 16.72240803 | 4 | 6  | 3 | 299  | 32.786  | 4.34 | 87.7 | 91   | 113.7 | 107.6 | 89.35 | 110.65 | 1.23839 | 0.132915 |
| Q8WV60         | PTCD2  | Pentatricopeptide repeat-<br>containing protein 2, mitochondrial<br>OS=Homo sapiens GN=PTCD2<br>PE=1 SV=3 | 5.412371134 | 2 | 2  | 2 | 388  | 43.939  | 9.23 | 90.9 | 87.8 | 104.3 | 117   | 89.35 | 110.65 | 1.23839 | 0.132915 |
| H0YNJ6         | GMPR2  | GMP reductase OS=Homo<br>sapiens GN=GMPR2 PE=1 SV=1                                                       | 6.791569087 | 3 | 3  | 3 | 427  | 46.908  | 8.51 | 90   | 88.7 | 116.6 | 104.7 | 89.35 | 110.65 | 1.23839 | 0.132915 |
| Q06124         | PTPN11 | Tyrosine-protein phosphatase non-<br>receptor type 11 OS=Homo<br>sapiens GN=PTPN11 PE=1 SV=2              | 5.862646566 | 3 | 4  | 3 | 597  | 68.393  | 7.3  | 86   | 92.7 | 119.4 | 101.9 | 89.35 | 110.65 | 1.23839 | 0.132915 |
| E9PGC5         | PTPRK  | Receptor-type tyrosine-protein<br>phosphatase kappa OS=Homo<br>sapiens GN=PTPRK PE=1 SV=1                 | 2.921195652 | 4 | 4  | 4 | 1472 | 165.922 | 5.91 | 84.2 | 94.5 | 106.5 | 114.8 | 89.35 | 110.65 | 1.23839 | 0.132915 |

|            |          |                                                                                                                                                           |             |    |    |    |     |        |      |       |      |       |       |       |        |         |          |
|------------|----------|-----------------------------------------------------------------------------------------------------------------------------------------------------------|-------------|----|----|----|-----|--------|------|-------|------|-------|-------|-------|--------|---------|----------|
| P06454     | PTMA     | Prothymosin alpha OS=Homo sapiens GN=PTMA PE=1 SV=2                                                                                                       | 12.61261261 | 1  | 5  | 1  | 111 | 12.196 | 3.78 | 87.9  | 90.9 | 111.6 | 109.5 | 89.4  | 110.55 | 1.23658 | 0.135815 |
| Q9BTE3     | MCMBP    | Mini-chromosome maintenance complex-binding protein OS=Homo sapiens GN=MCMBP PE=1 SV=2                                                                    | 10.28037383 | 5  | 5  | 5  | 642 | 72.934 | 5.87 | 90.8  | 88.1 | 115.7 | 105.5 | 89.45 | 110.6  | 1.23644 | 0.136029 |
| Q9NRY2     | INIP     | SOSS complex subunit C OS=Homo sapiens GN=INIP PE=1 SV=1                                                                                                  | 11.53846154 | 1  | 1  | 1  | 104 | 11.418 | 9.25 | 86.3  | 92.6 | 104.3 | 116.9 | 89.45 | 110.6  | 1.23644 | 0.136029 |
| P04424     | ASL      | Argininosuccinate lyase OS=Homo sapiens GN=ASL PE=1 SV=4                                                                                                  | 4.310344828 | 1  | 1  | 1  | 464 | 51.625 | 6.48 | 93.6  | 85.3 | 111.4 | 109.7 | 89.45 | 110.55 | 1.23589 | 0.136936 |
| Q9BQ61     | C19orf43 | Uncharacterized protein C19orf43 OS=Homo sapiens GN=C19orf43 PE=1 SV=1                                                                                    | 13.63636364 | 3  | 4  | 3  | 176 | 18.408 | 9.44 | 92.7  | 86.2 | 112.2 | 108.9 | 89.45 | 110.55 | 1.23589 | 0.136936 |
| B2RDE8     |          | cDNA, FLJ96580, highly similar to Homo sapiens hepatoma-derived growth factor (high-mobility group protein 1-like) (HDGF), mRNA OS=Homo sapiens PE=2 SV=1 | 38.33333333 | 9  | 17 | 8  | 240 | 26.789 | 4.67 | 100.5 | 78.4 | 116.2 | 104.9 | 89.45 | 110.55 | 1.23589 | 0.136936 |
| Q9NR19     | ACSS2    | Acetyl-coenzyme A synthetase, cytoplasmic OS=Homo sapiens GN=ACSS2 PE=1 SV=1                                                                              | 7.132667618 | 3  | 4  | 3  | 701 | 78.529 | 6.46 | 96.5  | 82.4 | 116.1 | 105   | 89.45 | 110.55 | 1.23589 | 0.136936 |
| V9HW62     | HEL-S-74 | Lactoylglutathione lyase OS=Homo sapiens GN=HEL-S-74 PE=2 SV=1                                                                                            | 50          | 9  | 11 | 9  | 184 | 20.706 | 5.47 | 92.4  | 86.5 | 115.4 | 105.6 | 89.45 | 110.5  | 1.23533 | 0.137848 |
| Q13829     | TNFAIP1  | BTB/POZ domain-containing adapter for CUL3-mediated RhoA degradation protein 2 OS=Homo sapiens GN=TNFAIP1 PE=1 SV=1                                       | 15.18987342 | 3  | 4  | 2  | 316 | 36.181 | 8.03 | 95.7  | 83.3 | 116.4 | 104.7 | 89.5  | 110.55 | 1.2352  | 0.138063 |
| A0A024RDE8 | PDLIM5   | PDZ and LIM domain 5, isoform CRA_c OS=Homo sapiens GN=PDLIM5 PE=4 SV=1                                                                                   | 26.84563758 | 12 | 17 | 12 | 596 | 63.935 | 8.21 | 89.6  | 89.4 | 112.6 | 108.4 | 89.5  | 110.5  | 1.23464 | 0.138981 |

|                |              |                                                                                             |             |    |    |    |      |         |      |      |      |       |       |       |        |         |          |
|----------------|--------------|---------------------------------------------------------------------------------------------|-------------|----|----|----|------|---------|------|------|------|-------|-------|-------|--------|---------|----------|
| Q7Z4G1         | COMMD6       | COMM domain-containing protein<br>6 OS=Homo sapiens<br>GN=COMMD6 PE=1 SV=1                  | 38.82352941 | 3  | 3  | 3  | 85   | 9.632   | 6    | 87.1 | 91.9 | 108.7 | 112.3 | 89.5  | 110.5  | 1.23464 | 0.138981 |
| Q9UP83         | COG5         | Conserved oligomeric Golgi<br>complex subunit 5 OS=Homo<br>sapiens GN=COG5 PE=1 SV=3        | 2.026221692 | 2  | 2  | 2  | 839  | 92.685  | 6.6  | 94.9 | 84.1 | 120.4 | 100.6 | 89.5  | 110.5  | 1.23464 | 0.138981 |
| Q9Y3B8         | REXO2        | Oligoribonuclease, mitochondrial<br>OS=Homo sapiens GN=REXO2<br>PE=1 SV=3                   | 34.17721519 | 6  | 6  | 6  | 237  | 26.816  | 6.87 | 87.7 | 91.3 | 117.9 | 103.1 | 89.5  | 110.5  | 1.23464 | 0.138981 |
| A0A024R<br>DG1 | VDP          | Vesicle docking protein p115,<br>isoform CRA_a OS=Homo sapiens<br>GN=VDP PE=4 SV=1          | 20.89397089 | 17 | 28 | 17 | 962  | 107.828 | 4.91 | 90.2 | 88.8 | 111.8 | 109.1 | 89.5  | 110.45 | 1.23408 | 0.139904 |
| G1JTE6         | MICA         | MHC class I chain-related protein<br>A (Fragment) OS=Homo sapiens<br>GN=MICA PE=4 SV=1      | 12.5        | 5  | 7  | 5  | 384  | 42.94   | 6.76 | 87.2 | 91.8 | 107.7 | 113.2 | 89.5  | 110.45 | 1.23408 | 0.139904 |
| Q7Z2Z2         | EFL1         | Elongation factor-like GTPase 1<br>OS=Homo sapiens GN=EFL1<br>PE=1 SV=2                     | 5.446428571 | 6  | 6  | 6  | 1120 | 125.35  | 5.91 | 91.5 | 87.6 | 116.7 | 104.3 | 89.55 | 110.5  | 1.23395 | 0.14012  |
| Q59ER5         |              | WD repeat-containing protein 1<br>isoform 1 variant (Fragment)<br>OS=Homo sapiens PE=2 SV=1 | 30.28846154 | 11 | 14 | 11 | 624  | 68.128  | 7.23 | 92   | 87.1 | 112   | 108.9 | 89.55 | 110.45 | 1.23339 | 0.141049 |
| V9HW37         | HEL-S-<br>69 | Epididymis secretory protein Li 69<br>OS=Homo sapiens GN=HEL-S-69<br>PE=1 SV=1              | 44.36229205 | 20 | 42 | 19 | 541  | 59.633  | 5.66 | 90.8 | 88.3 | 108.4 | 112.5 | 89.55 | 110.45 | 1.23339 | 0.141049 |
| Q86UA3         | C12orf1<br>0 | Chromosome 12 open reading<br>frame 10 OS=Homo sapiens<br>GN=C12orf10 PE=1 SV=1             | 18.88297872 | 6  | 6  | 6  | 376  | 42.482  | 6.84 | 88.9 | 90.2 | 112.7 | 108.2 | 89.55 | 110.45 | 1.23339 | 0.141049 |
| A0A024R5<br>71 | EHD1         | EH domain-containing protein 1<br>OS=Homo sapiens GN=EHD1<br>PE=1 SV=1                      | 37.04379562 | 16 | 19 | 14 | 548  | 61.888  | 6.71 | 86.4 | 92.7 | 112.2 | 108.7 | 89.55 | 110.45 | 1.23339 | 0.141049 |
| Q15942         | ZYX          | Zyxin OS=Homo sapiens GN=ZYX<br>PE=1 SV=1                                                   | 11.71328671 | 6  | 8  | 6  | 572  | 61.238  | 6.67 | 84.8 | 94.3 | 110.3 | 110.6 | 89.55 | 110.45 | 1.23339 | 0.141049 |

|                |         |                                                                                                                                                   |             |    |    |    |     |        |      |      |      |       |       |       |        |         |          |
|----------------|---------|---------------------------------------------------------------------------------------------------------------------------------------------------|-------------|----|----|----|-----|--------|------|------|------|-------|-------|-------|--------|---------|----------|
| Q86X55         | CARM1   | Histone-arginine methyltransferase<br>CARM1 OS=Homo sapiens<br>GN=CARM1 PE=1 SV=3                                                                 | 4.934210526 | 3  | 3  | 3  | 608 | 65.811 | 6.73 | 85.3 | 93.8 | 120.1 | 100.8 | 89.55 | 110.45 | 1.23339 | 0.141049 |
| A4D0U5         | TES     | Testis derived transcript (3 LIM<br>domains) OS=Homo sapiens<br>GN=TES PE=4 SV=1                                                                  | 38.47980998 | 12 | 18 | 12 | 421 | 47.964 | 7.68 | 84.6 | 94.5 | 112.6 | 108.3 | 89.55 | 110.45 | 1.23339 | 0.141049 |
| Q9Y547         | HSPB11  | Intraflagellar transport protein 25<br>homolog OS=Homo sapiens<br>GN=HSPB11 PE=1 SV=1                                                             | 27.77777778 | 3  | 5  | 3  | 144 | 16.287 | 5.03 | 93.8 | 85.3 | 115.7 | 105.1 | 89.55 | 110.4  | 1.23283 | 0.141983 |
| J3KQ32         | OLA1    | Obg-like ATPase 1 OS=Homo<br>sapiens GN=OLA1 PE=1 SV=1                                                                                            | 19.95192308 | 8  | 11 | 8  | 416 | 46.908 | 8.06 | 91.5 | 87.7 | 109.4 | 111.5 | 89.6  | 110.45 | 1.2327  | 0.1422   |
| B2R9K8         |         | cDNA, FLJ94440, highly similar to<br>Homo sapiens chaperonin<br>containing TCP1, subunit 6A (zeta<br>1)(CCT6A), mRNA OS=Homo<br>sapiens PE=2 SV=1 | 36.15819209 | 18 | 29 | 18 | 531 | 57.93  | 6.8  | 90.9 | 88.3 | 112.1 | 108.7 | 89.6  | 110.4  | 1.23214 | 0.14314  |
| Q99615         | DNAJC7  | DnaJ homolog subfamily C<br>member 7 OS=Homo sapiens<br>GN=DNAJC7 PE=1 SV=2                                                                       | 32.59109312 | 15 | 19 | 15 | 494 | 56.405 | 6.96 | 85.5 | 93.7 | 111.4 | 109.4 | 89.6  | 110.4  | 1.23214 | 0.14314  |
| A0A0F7G<br>8J1 | PLG     | Plasminogen OS=Homo sapiens<br>GN=PLG PE=2 SV=1                                                                                                   | 4.57354759  | 4  | 7  | 2  | 809 | 90.569 | 7.36 | 89.7 | 89.5 | 104   | 116.8 | 89.6  | 110.4  | 1.23214 | 0.14314  |
| Q9BVG3         | TRIM62  | E3 ubiquitin-protein ligase TRIM62<br>OS=Homo sapiens GN=TRIM62<br>PE=1 SV=1                                                                      | 1.473684211 | 1  | 1  | 1  | 475 | 54.233 | 6.62 | 96   | 83.3 | 115   | 105.8 | 89.65 | 110.4  | 1.23146 | 0.144304 |
| P28325         | CST5    | Cystatin-D OS=Homo sapiens<br>GN=CST5 PE=1 SV=1                                                                                                   | 4.929577465 | 1  | 2  | 1  | 142 | 16.07  | 7.17 | 90.7 | 88.6 | 117.9 | 102.9 | 89.65 | 110.4  | 1.23146 | 0.144304 |
| P23528         | CFL1    | Cofilin-1 OS=Homo sapiens<br>GN=CFL1 PE=1 SV=3                                                                                                    | 63.85542169 | 10 | 28 | 8  | 166 | 18.491 | 8.09 | 90.4 | 88.9 | 113.4 | 107.3 | 89.65 | 110.35 | 1.2309  | 0.145255 |
| Q15417         | CNN3    | Calponin-3 OS=Homo sapiens<br>GN=CNN3 PE=1 SV=1                                                                                                   | 11.55015198 | 3  | 3  | 2  | 329 | 36.391 | 6.05 | 89.8 | 89.5 | 106.5 | 114.2 | 89.65 | 110.35 | 1.2309  | 0.145255 |
| Q9NZ63         | C9orf78 | Uncharacterized protein C9orf78<br>OS=Homo sapiens GN=C9orf78<br>PE=1 SV=1                                                                        | 17.64705882 | 5  | 5  | 5  | 289 | 33.667 | 6.74 | 93.5 | 85.8 | 116.9 | 103.8 | 89.65 | 110.35 | 1.2309  | 0.145255 |

|                |        |                                                                                                                                       |             |     |     |    |      |         |      |      |       |       |       |       |        |         |          |
|----------------|--------|---------------------------------------------------------------------------------------------------------------------------------------|-------------|-----|-----|----|------|---------|------|------|-------|-------|-------|-------|--------|---------|----------|
| A8K8U1         |        | cDNA FLJ77762, highly similar to Homo sapiens cullin-associated and neddylation-dissociated 1 (CAND1), mRNA OS=Homo sapiens PE=2 SV=1 | 26.58536585 | 29  | 37  | 27 | 1230 | 136.231 | 5.83 | 92.1 | 87.2  | 117   | 103.7 | 89.65 | 110.35 | 1.2309  | 0.145255 |
| O95999         | BCL10  | B-cell lymphoma/leukemia 10 OS=Homo sapiens GN=BCL10 PE=1 SV=1                                                                        | 7.725321888 | 2   | 2   | 2  | 233  | 26.235  | 5.74 | 89   | 90.3  | 100.5 | 120.2 | 89.65 | 110.35 | 1.2309  | 0.145255 |
| B5BUC0         | GSK3B  | Glycogen synthase kinase-3 beta (Fragment) OS=Homo sapiens GN=GSK3B PE=2 SV=1                                                         | 15          | 5   | 5   | 1  | 420  | 46.669  | 8.87 | 84.9 | 94.4  | 111.9 | 108.7 | 89.65 | 110.3  | 1.23034 | 0.146211 |
| P12004         | PCNA   | Proliferating cell nuclear antigen OS=Homo sapiens GN=PCNA PE=1 SV=1                                                                  | 52.87356322 | 12  | 29  | 12 | 261  | 28.75   | 4.69 | 97   | 82.4  | 117   | 103.7 | 89.7  | 110.35 | 1.23021 | 0.146432 |
| B0YIW2         | APOC3  | Apolipoprotein C-III OS=Homo sapiens GN=APOC3 PE=1 SV=1                                                                               | 13.67521368 | 1   | 2   | 1  | 117  | 12.807  | 8.18 | 78.1 | 101.3 | 101.2 | 119.5 | 89.7  | 110.35 | 1.23021 | 0.146432 |
| O75369         | FLNB   | Filamin-B OS=Homo sapiens GN=FLNB PE=1 SV=2                                                                                           | 53.72790161 | 104 | 230 | 97 | 2602 | 277.99  | 5.73 | 92.1 | 87.3  | 112.4 | 108.2 | 89.7  | 110.3  | 1.22965 | 0.147393 |
| Q9NZN4         | EHD2   | EH domain-containing protein 2 OS=Homo sapiens GN=EHD2 PE=1 SV=2                                                                      | 17.86372007 | 9   | 11  | 8  | 543  | 61.123  | 6.46 | 92.2 | 87.2  | 115.6 | 105   | 89.7  | 110.3  | 1.22965 | 0.147393 |
| Q96LW7         | CARD19 | Caspase recruitment domain-containing protein 19 OS=Homo sapiens GN=CARD19 PE=1 SV=1                                                  | 10.0877193  | 2   | 2   | 2  | 228  | 25.573  | 9.2  | 89.8 | 89.6  | 129.6 | 91    | 89.7  | 110.3  | 1.22965 | 0.147393 |
| A0A0S2Z4<br>B5 | PPP3CA | Serine/threonine-protein phosphatase (Fragment) OS=Homo sapiens GN=PPP3CA PE=2 SV=1                                                   | 11.93737769 | 6   | 6   | 6  | 511  | 57.622  | 6.3  | 92.9 | 86.6  | 113.4 | 107.1 | 89.75 | 110.25 | 1.22841 | 0.149556 |
| Q8TE77         | SSH3   | Protein phosphatase Slingshot homolog 3 OS=Homo sapiens GN=SSH3 PE=1 SV=2                                                             | 1.820940819 | 1   | 1   | 1  | 659  | 72.951  | 5.3  | 86.6 | 92.9  | 116.1 | 104.4 | 89.75 | 110.25 | 1.22841 | 0.149556 |

|             |        |                                                                                                             |             |    |    |    |      |         |      |      |      |       |       |       |        |         |          |
|-------------|--------|-------------------------------------------------------------------------------------------------------------|-------------|----|----|----|------|---------|------|------|------|-------|-------|-------|--------|---------|----------|
| P36507      | MAP2K2 | Dual specificity mitogen-activated protein kinase kinase 2 OS=Homo sapiens GN=MAP2K2 PE=1 SV=1              | 15          | 6  | 8  | 3  | 400  | 44.396  | 6.55 | 84.9 | 94.6 | 114.7 | 105.8 | 89.75 | 110.25 | 1.22841 | 0.149556 |
| Q99426      | TBCB   | Tubulin-folding cofactor B OS=Homo sapiens GN=TBCB PE=1 SV=2                                                | 9.016393443 | 2  | 2  | 2  | 244  | 27.308  | 5.15 | 82.2 | 97.3 | 115   | 105.5 | 89.75 | 110.25 | 1.22841 | 0.149556 |
| P05362      | ICAM1  | Intercellular adhesion molecule 1 OS=Homo sapiens GN=ICAM1 PE=1 SV=2                                        | 16.35338346 | 6  | 8  | 6  | 532  | 57.789  | 7.99 | 91.1 | 88.4 | 105.7 | 114.7 | 89.75 | 110.2  | 1.22786 | 0.150534 |
| A8K3B6      |        | Tyrosine-protein kinase OS=Homo sapiens PE=2 SV=1                                                           | 7.555555556 | 4  | 4  | 4  | 450  | 50.67   | 7.06 | 90.6 | 88.9 | 112.8 | 107.6 | 89.75 | 110.2  | 1.22786 | 0.150534 |
| A0AVF1      | TTC26  | Intraflagellar transport protein 56 OS=Homo sapiens GN=TTC26 PE=2 SV=1                                      | 3.610108303 | 1  | 1  | 1  | 554  | 64.136  | 6.93 | 90.5 | 89.1 | 115.5 | 105   | 89.8  | 110.25 | 1.22773 | 0.150758 |
| Q7L9L4      | MOB1B  | MOB kinase activator 1B OS=Homo sapiens GN=MOB1B PE=1 SV=3                                                  | 8.796296296 | 2  | 2  | 2  | 216  | 25.075  | 6.73 | 81.1 | 98.5 | 107.2 | 113.3 | 89.8  | 110.25 | 1.22773 | 0.150758 |
| P34896      | SHMT1  | Serine hydroxymethyltransferase, cytosolic OS=Homo sapiens GN=SHMT1 PE=1 SV=1                               | 12.42236025 | 4  | 8  | 4  | 483  | 53.049  | 7.71 | 95.2 | 84.4 | 113.1 | 107.3 | 89.8  | 110.2  | 1.22717 | 0.151742 |
| P67775      | PPP2CA | Serine/threonine-protein phosphatase 2A catalytic subunit alpha isoform OS=Homo sapiens GN=PPP2CA PE=1 SV=1 | 51.45631068 | 11 | 19 | 2  | 309  | 35.571  | 5.54 | 92.3 | 87.3 | 115.4 | 105   | 89.8  | 110.2  | 1.22717 | 0.151742 |
| A0A0A0M SG2 | FHL2   | Four and a half LIM domains protein 2 OS=Homo sapiens GN=FHL2 PE=1 SV=1                                     | 41.26582278 | 14 | 20 | 14 | 395  | 44.808  | 8.06 | 85.4 | 94.2 | 103.3 | 117.1 | 89.8  | 110.2  | 1.22717 | 0.151742 |
| Q6AI08      | HEATR6 | HEAT repeat-containing protein 6 OS=Homo sapiens GN=HEATR6 PE=1 SV=1                                        | 0.931414056 | 1  | 1  | 1  | 1181 | 128.699 | 7.03 | 83.8 | 95.8 | 115.5 | 104.9 | 89.8  | 110.2  | 1.22717 | 0.151742 |
| Q5T4S7      | UBR4   | E3 ubiquitin-protein ligase UBR4 OS=Homo sapiens GN=UBR4 PE=1 SV=1                                          | 6.463438163 | 25 | 35 | 25 | 5183 | 573.476 | 6.04 | 88.9 | 90.7 | 114.2 | 106.1 | 89.8  | 110.15 | 1.22661 | 0.152731 |

|            |           |                                                                                                                                          |             |    |    |    |      |         |      |      |       |       |       |       |        |         |          |
|------------|-----------|------------------------------------------------------------------------------------------------------------------------------------------|-------------|----|----|----|------|---------|------|------|-------|-------|-------|-------|--------|---------|----------|
| P62258     | YWHAE     | 14-3-3 protein epsilon OS=Homo sapiens GN=YWHAE PE=1 SV=1                                                                                | 74.50980392 | 18 | 64 | 16 | 255  | 29.155  | 4.74 | 91.5 | 88.2  | 113.8 | 106.6 | 89.85 | 110.2  | 1.22649 | 0.152956 |
| Q96Q05     | TRAPP C9  | Trafficking protein particle complex subunit 9 OS=Homo sapiens GN=TRAPPC9 PE=1 SV=2                                                      | 2.613240418 | 2  | 2  | 2  | 1148 | 128.449 | 6.62 | 85.3 | 94.4  | 106.4 | 114   | 89.85 | 110.2  | 1.22649 | 0.152956 |
| Q9H4A4     | RNPEP     | Aminopeptidase B OS=Homo sapiens GN=RNPEP PE=1 SV=2                                                                                      | 25.53846154 | 15 | 20 | 15 | 650  | 72.549  | 5.74 | 94.1 | 85.6  | 116.7 | 103.6 | 89.85 | 110.15 | 1.22593 | 0.153952 |
| Q8TDJ5     | TFG/ALK   | Tyrosine-protein kinase receptor OS=Homo sapiens GN=TFG/ALK fusion PE=2 SV=1                                                             | 15.06849315 | 9  | 16 | 9  | 803  | 88.615  | 6.33 | 93.6 | 86.1  | 117.8 | 102.5 | 89.85 | 110.15 | 1.22593 | 0.153952 |
| A8K7Z3     |           | cDNA FLJ77229, highly similar to Homo sapiens GRIP1 associated protein 1 (GRIPAP1), transcript variant 1, mRNA OS=Homo sapiens PE=2 SV=1 | 11.77170036 | 8  | 10 | 8  | 841  | 95.932  | 5.07 | 92.3 | 87.4  | 119.3 | 101   | 89.85 | 110.15 | 1.22593 | 0.153952 |
| E9PSG9     | POLR2M    | DNA-directed RNA polymerase II subunit GRINL1A, isoforms 4/5 OS=Homo sapiens GN=POLR2M PE=4 SV=1                                         | 8.176100629 | 1  | 1  | 1  | 159  | 16.161  | 8.21 | 86.4 | 93.3  | 115   | 105.3 | 89.85 | 110.15 | 1.22593 | 0.153952 |
| A0A024R1X5 | BECN1     | Beclin 1 (Coiled-coil, myosin-like BCL2 interacting protein), isoform CRA_b OS=Homo sapiens GN=BECN1 PE=2 SV=1                           | 2.222222222 | 1  | 1  | 1  | 450  | 51.863  | 4.89 | 87.4 | 92.3  | 106.6 | 113.6 | 89.85 | 110.1  | 1.22538 | 0.154953 |
| A8K0G7     |           | cDNA FLJ78425, highly similar to Homo sapiens zinc fingers and homeoboxes 1 (ZHX1), mRNA OS=Homo sapiens PE=2 SV=1                       | 1.26002291  | 1  | 1  | 1  | 873  | 98.012  | 5.91 | 99.2 | 80.6  | 118.9 | 101.4 | 89.9  | 110.15 | 1.22525 | 0.155179 |
| Q9P1Z2     | CALCO CO1 | Calcium-binding and coiled-coil domain-containing protein 1 OS=Homo sapiens GN=CALCOCO1 PE=1 SV=2                                        | 2.170767004 | 1  | 2  | 1  | 691  | 77.289  | 4.82 | 70.7 | 109.1 | 99.3  | 121   | 89.9  | 110.15 | 1.22525 | 0.155179 |
| Q6PIJ6     | FBXO38    | F-box only protein 38 OS=Homo sapiens GN=FBXO38 PE=1 SV=3                                                                                | 2.525252525 | 2  | 2  | 2  | 1188 | 133.858 | 6.33 | 94   | 85.8  | 109.6 | 110.6 | 89.9  | 110.1  | 1.22469 | 0.156186 |



|            |            |                                                                                                                  |             |    |    |    |     |        |      |       |      |       |       |       |        |         |          |
|------------|------------|------------------------------------------------------------------------------------------------------------------|-------------|----|----|----|-----|--------|------|-------|------|-------|-------|-------|--------|---------|----------|
| Q8NBP7     | PCSK9      | Proprotein convertase subtilisin/kexin type 9 OS=Homo sapiens GN=PCSK9 PE=1 SV=3                                 | 15.31791908 | 9  | 10 | 9  | 692 | 74.239 | 6.61 | 93.9  | 85.9 | 111.2 | 109   | 89.9  | 110.1  | 1.22469 | 0.156186 |
| Q9Y5B8     | NME7       | Nucleoside diphosphate kinase 7 OS=Homo sapiens GN=NME7 PE=1 SV=1                                                | 6.382978723 | 2  | 2  | 2  | 376 | 42.464 | 6.47 | 91.6  | 88.2 | 110.8 | 109.4 | 89.9  | 110.1  | 1.22469 | 0.156186 |
| Q53FE8     |            | cDNA FLJ36526 fis, clone TRACH2003347, highly similar to NSFL1 cofactor p47 (Fragment) OS=Homo sapiens PE=2 SV=1 | 25.94594595 | 7  | 9  | 7  | 370 | 40.547 | 5.14 | 87.8  | 92   | 113.7 | 106.5 | 89.9  | 110.1  | 1.22469 | 0.156186 |
| Q7L5N1     | COPS6      | COP9 signalosome complex subunit 6 OS=Homo sapiens GN=COPS6 PE=1 SV=1                                            | 36.39143731 | 9  | 12 | 9  | 327 | 36.14  | 5.73 | 93.8  | 86   | 114.5 | 105.7 | 89.9  | 110.1  | 1.22469 | 0.156186 |
| Q9NP77     | SSU72      | RNA polymerase II subunit A C-terminal domain phosphatase SSU72 OS=Homo sapiens GN=SSU72 PE=1 SV=1               | 5.154639175 | 1  | 1  | 1  | 194 | 22.56  | 5.33 | 93.7  | 86.1 | 127.6 | 92.6  | 89.9  | 110.1  | 1.22469 | 0.156186 |
| P51797     | CLCN6      | Chloride transport protein 6 OS=Homo sapiens GN=CLCN6 PE=1 SV=2                                                  | 1.726121979 | 1  | 1  | 1  | 869 | 97.225 | 6.81 | 88.9  | 90.9 | 120.3 | 99.9  | 89.9  | 110.1  | 1.22469 | 0.156186 |
| E9PL57     | NEDD8-MDP1 | Protein NEDD8-MDP1 (Fragment) OS=Homo sapiens GN=NEDD8-MDP1 PE=4 SV=1                                            | 6.470588235 | 1  | 1  | 1  | 170 | 19.524 | 7.43 | 100.8 | 79   | 115.6 | 104.5 | 89.9  | 110.05 | 1.22414 | 0.157199 |
| O14929     | HAT1       | Histone acetyltransferase type B catalytic subunit OS=Homo sapiens GN=HAT1 PE=1 SV=1                             | 19.80906921 | 7  | 11 | 7  | 419 | 49.481 | 5.69 | 89.5  | 90.3 | 118.2 | 101.9 | 89.9  | 110.05 | 1.22414 | 0.157199 |
| A0A0B4J1R4 | HPD        | 4-hydroxyphenylpyruvate dioxygenase OS=Homo sapiens GN=HPD PE=1 SV=1                                             | 13.99491094 | 4  | 4  | 4  | 393 | 44.936 | 7.01 | 88.6  | 91.3 | 109.8 | 110.4 | 89.95 | 110.1  | 1.22401 | 0.157426 |
| B0QY89     | EIF3L      | Eukaryotic translation initiation factor 3 subunit L OS=Homo sapiens GN=EIF3L PE=1 SV=1                          | 17.79242175 | 11 | 17 | 11 | 607 | 70.857 | 6.65 | 95    | 84.9 | 112.4 | 107.8 | 89.95 | 110.1  | 1.22401 | 0.157426 |

|            |              |                                                                                                                               |             |    |    |    |      |         |      |      |      |       |       |       |        |         |          |
|------------|--------------|-------------------------------------------------------------------------------------------------------------------------------|-------------|----|----|----|------|---------|------|------|------|-------|-------|-------|--------|---------|----------|
| A0A161I202 | LTF          | Lactoferrin OS=Homo sapiens<br>GN=LTF PE=2 SV=1                                                                               | 2.953586498 | 2  | 5  | 2  | 711  | 78.288  | 8.18 | 88.3 | 91.6 | 103.8 | 116.4 | 89.95 | 110.1  | 1.22401 | 0.157426 |
| Q9Y3D8     | AK6          | Adenylate kinase isoenzyme 6<br>OS=Homo sapiens GN=AK6 PE=1<br>SV=1                                                           | 5.23255814  | 1  | 1  | 1  | 172  | 20.049  | 4.58 | 89.6 | 90.3 | 114.6 | 105.5 | 89.95 | 110.05 | 1.22346 | 0.158445 |
| Q13439     | GOLGA4       | Golgin subfamily A member 4<br>OS=Homo sapiens GN=GOLGA4<br>PE=1 SV=1                                                         | 16.50224215 | 34 | 40 | 34 | 2230 | 260.98  | 5.39 | 88.9 | 91   | 111.4 | 108.7 | 89.95 | 110.05 | 1.22346 | 0.158445 |
| A0A0K1H1B1 | DDX60L       | Putative ATP-dependent RNA<br>helicase DDX60 OS=Homo<br>sapiens GN=DDX60L PE=2 SV=1                                           | 1.348182884 | 2  | 2  | 2  | 1706 | 197.569 | 8.29 | 87.1 | 92.8 | 113.5 | 106.6 | 89.95 | 110.05 | 1.22346 | 0.158445 |
| A0A0U1R6   | ENAH         | Protein enabled homolog<br>OS=Homo sapiens GN=ENAH<br>PE=1 SV=1                                                               | 5.36159601  | 3  | 4  | 3  | 802  | 87.346  | 7.77 | 97.9 | 82   | 113.4 | 106.7 | 89.95 | 110.05 | 1.22346 | 0.158445 |
| Q5T9B7     | AK1          | Adenylate kinase isoenzyme 1<br>OS=Homo sapiens GN=AK1 PE=1<br>SV=1                                                           | 8.571428571 | 2  | 2  | 2  | 210  | 23.396  | 8.6  | 84.5 | 95.4 | 111.4 | 108.7 | 89.95 | 110.05 | 1.22346 | 0.158445 |
| Q9NRN7     | AASDH<br>PPT | L-aminoadipate-semialdehyde<br>dehydrogenase-<br>phosphopantetheinyl transferase<br>OS=Homo sapiens<br>GN=AASDH PPT PE=1 SV=2 | 9.061488673 | 2  | 2  | 2  | 309  | 35.753  | 6.8  | 88.9 | 91.1 | 112.6 | 107.4 | 90    | 110    | 1.22222 | 0.160728 |
| B4E0Y9     | STK26        | Serine/threonine-protein kinase 26<br>OS=Homo sapiens GN=STK26<br>PE=1 SV=1                                                   | 31.27853881 | 11 | 14 | 5  | 438  | 49.153  | 5.68 | 90.9 | 89.1 | 117.2 | 102.8 | 90    | 110    | 1.22222 | 0.160728 |
| B8ZWD9     | DBI          | Diazepam binding inhibitor, splice<br>form 1D(2) OS=Homo sapiens<br>GN=DBI PE=2 SV=1                                          | 38.19444444 | 5  | 11 | 5  | 144  | 16.1    | 5.05 | 82.7 | 97.3 | 114.5 | 105.4 | 90    | 109.95 | 1.22167 | 0.161763 |
| A0A024R718 | PBEF1        | Pre-B-cell colony enhancing factor<br>1, isoform CRA_a OS=Homo<br>sapiens GN=PBEF1 PE=4 SV=1                                  | 20.97759674 | 8  | 8  | 8  | 491  | 55.487  | 7.15 | 96.6 | 83.5 | 113.4 | 106.6 | 90.05 | 110    | 1.22154 | 0.161994 |
| A0A024R3L9 | VPS26B       | Vacuolar protein sorting 26<br>homolog B (Yeast), isoform CRA_a                                                               | 5.952380952 | 2  | 2  | 1  | 336  | 39.13   | 7.36 | 93.8 | 86.3 | 115   | 105   | 90.05 | 110    | 1.22154 | 0.161994 |

|                |        |                                                                                                           |             |    |    |    |      |         |      |       |      |       |       |       |        |         |          |  |
|----------------|--------|-----------------------------------------------------------------------------------------------------------|-------------|----|----|----|------|---------|------|-------|------|-------|-------|-------|--------|---------|----------|--|
|                |        | OS=Homo sapiens GN=VPS26B<br>PE=4 SV=1                                                                    |             |    |    |    |      |         |      |       |      |       |       |       |        |         |          |  |
| Q8TEY7         | USP33  | Ubiquitin carboxyl-terminal<br>hydrolase 33 OS=Homo sapiens<br>GN=USP33 PE=1 SV=2                         | 6.794055202 | 4  | 5  | 4  | 942  | 106.659 | 6.02 | 92.6  | 87.5 | 109.5 | 110.4 | 90.05 | 109.95 | 1.22099 | 0.163035 |  |
| Q5VYK3         | ECM29  | Proteasome-associated protein<br>ECM29 homolog OS=Homo<br>sapiens GN=ECM29 PE=1 SV=2                      | 14.09214092 | 19 | 23 | 19 | 1845 | 204.16  | 7.12 | 97    | 83.1 | 114   | 105.9 | 90.05 | 109.95 | 1.22099 | 0.163035 |  |
| O15357         | INPPL1 | Phosphatidylinositol 3,4,5-<br>trisphosphate 5-phosphatase 2<br>OS=Homo sapiens GN=INPPL1<br>PE=1 SV=2    | 8.585055644 | 9  | 9  | 9  | 1258 | 138.513 | 6.54 | 90.3  | 89.8 | 115   | 104.9 | 90.05 | 109.95 | 1.22099 | 0.163035 |  |
| Q9Y244         | POMP   | Proteasome maturation protein<br>OS=Homo sapiens GN=POMP<br>PE=1 SV=1                                     | 5.673758865 | 1  | 1  | 1  | 141  | 15.779  | 5.11 | 86.5  | 93.6 | 114.4 | 105.4 | 90.05 | 109.9  | 1.22043 | 0.164083 |  |
| K7EQB2         | GLYR1  | Putative oxidoreductase GLYR1<br>(Fragment) OS=Homo sapiens<br>GN=GLYR1 PE=1 SV=8                         | 24.32432432 | 4  | 6  | 1  | 185  | 20.46   | 9.54 | 83.7  | 96.5 | 111.4 | 108.5 | 90.1  | 109.95 | 1.22031 | 0.164314 |  |
| Q96T51         | RUFY1  | RUN and FYVE domain-containing<br>protein 1 OS=Homo sapiens<br>GN=RUFY1 PE=1 SV=2                         | 25.70621469 | 15 | 18 | 15 | 708  | 79.767  | 5.74 | 86.8  | 93.4 | 112.1 | 107.7 | 90.1  | 109.9  | 1.21976 | 0.165368 |  |
| A0A024R<br>A80 | TXNDC3 | Thioredoxin domain containing 3<br>(Spermatozoa), isoform CRA_a<br>OS=Homo sapiens GN=TXNDC3<br>PE=4 SV=1 | 1.19047619  | 1  | 1  | 1  | 588  | 67.199  | 4.97 | 101.6 | 78.6 | 116.9 | 102.9 | 90.1  | 109.9  | 1.21976 | 0.165368 |  |
| Q13643         | FHL3   | Four and a half LIM domains<br>protein 3 OS=Homo sapiens<br>GN=FHL3 PE=1 SV=4                             | 13.21428571 | 2  | 3  | 2  | 280  | 31.171  | 6.2  | 94.7  | 85.5 | 111.2 | 108.6 | 90.1  | 109.9  | 1.21976 | 0.165368 |  |
| Q16186         | ADRM1  | Proteasomal ubiquitin receptor<br>ADRM1 OS=Homo sapiens<br>GN=ADRM1 PE=1 SV=2                             | 16.46191646 | 5  | 6  | 5  | 407  | 42.127  | 5.07 | 93.2  | 87   | 114   | 105.8 | 90.1  | 109.9  | 1.21976 | 0.165368 |  |
| B2R9W9         |        | Craniofacial development protein 1<br>OS=Homo sapiens PE=2 SV=1                                           | 2.675585284 | 1  | 1  | 1  | 299  | 33.587  | 4.81 | 92.2  | 88   | 116.9 | 102.9 | 90.1  | 109.9  | 1.21976 | 0.165368 |  |

|                |              |                                                                                                                               |             |    |     |    |      |         |      |      |       |       |       |       |        |         |          |
|----------------|--------------|-------------------------------------------------------------------------------------------------------------------------------|-------------|----|-----|----|------|---------|------|------|-------|-------|-------|-------|--------|---------|----------|
| E7EWW0         | C16orf6<br>2 | UPF0505 protein C16orf62<br>OS=Homo sapiens GN=C16orf62<br>PE=1 SV=2                                                          | 1.140684411 | 1  | 1   | 1  | 1052 | 118.537 | 7.84 | 83.7 | 96.5  | 111.7 | 108.1 | 90.1  | 109.9  | 1.21976 | 0.165368 |
| A0A024R9<br>30 | PRG4         | Proteoglycan 4, isoform CRA_a<br>OS=Homo sapiens GN=PRG4<br>PE=4 SV=1                                                         | 0.783475783 | 1  | 1   | 1  | 1404 | 150.984 | 9.5  | 82.6 | 97.6  | 91.5  | 128.3 | 90.1  | 109.9  | 1.21976 | 0.165368 |
| A0A024R8<br>06 | MGC109<br>11 | Uncharacterized protein OS=Homo<br>sapiens GN=MGC10911 PE=4<br>SV=1                                                           | 18.85245902 | 2  | 2   | 2  | 122  | 13.096  | 7.88 | 92.1 | 88.1  | 113.9 | 105.8 | 90.1  | 109.85 | 1.2192  | 0.166427 |
| P40261         | NNMT         | Nicotinamide N-methyltransferase<br>OS=Homo sapiens GN=NNMT<br>PE=1 SV=1                                                      | 20.83333333 | 4  | 6   | 4  | 264  | 29.555  | 5.74 | 84.7 | 95.6  | 112.4 | 107.4 | 90.15 | 109.9  | 1.21908 | 0.166659 |
| D6REX3         | SEC31A       | Protein transport protein Sec31A<br>OS=Homo sapiens GN=SEC31A<br>PE=1 SV=1                                                    | 13.7490008  | 16 | 20  | 16 | 1251 | 136.141 | 6.98 | 91.9 | 88.4  | 113.7 | 106   | 90.15 | 109.85 | 1.21852 | 0.167725 |
| Q15057         | ACAP2        | Arf-GAP with coiled-coil, ANK<br>repeat and PH domain-containing<br>protein 2 OS=Homo sapiens<br>GN=ACAP2 PE=1 SV=3           | 10.41131105 | 7  | 7   | 7  | 778  | 87.973  | 6.8  | 90.3 | 90    | 113.4 | 106.3 | 90.15 | 109.85 | 1.21852 | 0.167725 |
| P04406         | GAPDH        | Glyceraldehyde-3-phosphate<br>dehydrogenase OS=Homo sapiens<br>GN=GAPDH PE=1 SV=3                                             | 80.59701493 | 24 | 214 | 24 | 335  | 36.03   | 8.46 | 87.9 | 92.4  | 113.2 | 106.5 | 90.15 | 109.85 | 1.21852 | 0.167725 |
| A0A0C4D<br>GB5 | CAST         | Calpastatin OS=Homo sapiens<br>GN=CAST PE=1 SV=1                                                                              | 32.75862069 | 19 | 38  | 1  | 754  | 80.95   | 5.1  | 91.1 | 89.2  | 114.7 | 105   | 90.15 | 109.85 | 1.21852 | 0.167725 |
| Q8N4V1         | MMGT1        | Membrane magnesium transporter<br>1 OS=Homo sapiens GN=MMGT1<br>PE=1 SV=1                                                     | 23.66412214 | 2  | 6   | 2  | 131  | 14.677  | 9.16 | 73.2 | 107.1 | 108.1 | 111.6 | 90.15 | 109.85 | 1.21852 | 0.167725 |
| A8K8N7         | PFAS         | Phosphoribosylformylglycinamide<br>synthase (FGAR<br>amidotransferase), isoform CRA_b<br>OS=Homo sapiens GN=PFAS<br>PE=2 SV=1 | 12.63079223 | 13 | 13  | 13 | 1338 | 144.633 | 5.76 | 92.8 | 87.5  | 112   | 107.6 | 90.15 | 109.8  | 1.21797 | 0.168796 |

|            |       |                                                                                                                              |             |    |     |    |      |         |      |      |      |       |       |       |        |         |          |
|------------|-------|------------------------------------------------------------------------------------------------------------------------------|-------------|----|-----|----|------|---------|------|------|------|-------|-------|-------|--------|---------|----------|
| Q9Y4E8     | USP15 | Ubiquitin carboxyl-terminal hydrolase 15 OS=Homo sapiens GN=USP15 PE=1 SV=3                                                  | 8.76656473  | 7  | 7   | 7  | 981  | 112.348 | 5.22 | 89.1 | 91.2 | 113.2 | 106.4 | 90.15 | 109.8  | 1.21797 | 0.168796 |
| A8K2Z3     |       | cDNA FLJ76092, highly similar to Homo sapiens 5'-nucleotidase, cytosolic II-like 1 (NT5C2L1), mRNA OS=Homo sapiens PE=2 SV=1 | 2.417582418 | 1  | 1   | 1  | 455  | 51.826  | 6.35 | 85.8 | 94.5 | 113.9 | 105.7 | 90.15 | 109.8  | 1.21797 | 0.168796 |
| Q12929     | EPS8  | Epidermal growth factor receptor kinase substrate 8 OS=Homo sapiens GN=EPS8 PE=1 SV=1                                        | 4.622871046 | 3  | 3   | 3  | 822  | 91.824  | 7.5  | 86.3 | 94.1 | 108.3 | 111.3 | 90.2  | 109.8  | 1.21729 | 0.170106 |
| O14737     | PDCD5 | Programmed cell death protein 5 OS=Homo sapiens GN=PDCD5 PE=1 SV=3                                                           | 40          | 5  | 6   | 5  | 125  | 14.276  | 6.04 | 99.6 | 80.8 | 114   | 105.6 | 90.2  | 109.8  | 1.21729 | 0.170106 |
| B4DRM3     |       | cDNA FLJ54492, highly similar to Eukaryotic translation initiation factor 4B OS=Homo sapiens PE=2 SV=1                       | 21.26623377 | 12 | 18  | 12 | 616  | 69.685  | 5.67 | 95   | 85.4 | 110.9 | 108.7 | 90.2  | 109.8  | 1.21729 | 0.170106 |
| A0A024R3Z6 | BZW1  | Basic leucine zipper and W2 domains 1, isoform CRA_a OS=Homo sapiens GN=BZW1 PE=4 SV=1                                       | 30.7875895  | 15 | 32  | 12 | 419  | 48.013  | 5.92 | 94.2 | 86.2 | 117.3 | 102.3 | 90.2  | 109.8  | 1.21729 | 0.170106 |
| Q0IIN1     | KRT77 | Keratin 77 OS=Homo sapiens GN=KRT77 PE=1 SV=1                                                                                | 11.5916955  | 7  | 17  | 2  | 578  | 61.764  | 5.85 | 83.7 | 96.7 | 122.3 | 97.3  | 90.2  | 109.8  | 1.21729 | 0.170106 |
| F5H265     | UBC   | Polyubiquitin-C (Fragment) OS=Homo sapiens GN=UBC PE=1 SV=1                                                                  | 64.4295302  | 6  | 104 | 1  | 149  | 16.831  | 6.58 | 82.4 | 98   | 97.1  | 122.5 | 90.2  | 109.8  | 1.21729 | 0.170106 |
| Q9Y490     | TLN1  | Talin-1 OS=Homo sapiens GN=TLN1 PE=1 SV=3                                                                                    | 30.3030303  | 62 | 105 | 53 | 2541 | 269.599 | 6.07 | 90.1 | 90.4 | 111.7 | 107.9 | 90.25 | 109.8  | 1.21662 | 0.171425 |
| A0A024RD93 | PAICS | Phosphoribosylaminoimidazole carboxylase, phosphoribosylaminoimidazole succinocarboxamide synthetase,                        | 32.47058824 | 12 | 25  | 12 | 425  | 47.049  | 7.23 | 90.7 | 89.8 | 112.9 | 106.6 | 90.25 | 109.75 | 1.21607 | 0.172513 |

|                |        |                                                                                                                                       |             |    |     |    |      |         |      |      |      |       |       |       |        |         |          |  |
|----------------|--------|---------------------------------------------------------------------------------------------------------------------------------------|-------------|----|-----|----|------|---------|------|------|------|-------|-------|-------|--------|---------|----------|--|
|                |        | isoform CRA_c OS=Homo sapiens<br>GN=PAICS PE=3 SV=1                                                                                   |             |    |     |    |      |         |      |      |      |       |       |       |        |         |          |  |
| Q53GE7         |        | Tetratricopeptide repeat domain 1<br>variant (Fragment) OS=Homo<br>sapiens PE=2 SV=1                                                  | 23.63013699 | 6  | 8   | 6  | 292  | 33.574  | 4.88 | 89.6 | 90.9 | 112.5 | 107   | 90.25 | 109.75 | 1.21607 | 0.172513 |  |
| Q15642         | TRIP10 | Cdc42-interacting protein 4<br>OS=Homo sapiens GN=TRIP10<br>PE=1 SV=3                                                                 | 9.816971714 | 6  | 6   | 6  | 601  | 68.31   | 5.73 | 87.8 | 92.7 | 112.2 | 107.3 | 90.25 | 109.75 | 1.21607 | 0.172513 |  |
| A0A0S2Z4<br>89 | PSMD12 | Proteasome (Prosome, macropain)<br>26S subunit, non-ATPase, 12,<br>isoform CRA_a (Fragment)<br>OS=Homo sapiens GN=PSMD12<br>PE=2 SV=1 | 32.01754386 | 11 | 18  | 11 | 456  | 52.871  | 7.65 | 95.5 | 85   | 114.3 | 105.2 | 90.25 | 109.75 | 1.21607 | 0.172513 |  |
| P61024         | CKS1B  | Cyclin-dependent kinases<br>regulatory subunit 1 OS=Homo<br>sapiens GN=CKS1B PE=1 SV=1                                                | 32.91139241 | 2  | 3   | 2  | 79   | 9.654   | 8.94 | 90.4 | 90.1 | 89.2  | 130.3 | 90.25 | 109.75 | 1.21607 | 0.172513 |  |
| Q12792         | TWF1   | Twinfilin-1 OS=Homo sapiens<br>GN=TWF1 PE=1 SV=3                                                                                      | 16.28571429 | 5  | 5   | 4  | 350  | 40.258  | 6.96 | 87.2 | 93.3 | 114   | 105.5 | 90.25 | 109.75 | 1.21607 | 0.172513 |  |
| A0A1B0G<br>TU4 | PXN    | Paxillin OS=Homo sapiens<br>GN=PXN PE=4 SV=1                                                                                          | 3.977798335 | 2  | 3   | 2  | 1081 | 115.832 | 5.64 | 89.7 | 90.8 | 108.9 | 110.5 | 90.25 | 109.7  | 1.21551 | 0.173608 |  |
| O43707         | ACTN4  | Alpha-actinin-4 OS=Homo sapiens<br>GN=ACTN4 PE=1 SV=2                                                                                 | 60.59275521 | 49 | 166 | 34 | 911  | 104.788 | 5.44 | 97.4 | 83.2 | 109.7 | 109.8 | 90.3  | 109.75 | 1.21539 | 0.173844 |  |
| Q9Y3E8         |        | CGI-150 protein OS=Homo<br>sapiens PE=2 SV=1                                                                                          | 17.26190476 | 7  | 9   | 7  | 504  | 54.977  | 8.7  | 92.4 | 88.2 | 113.9 | 105.6 | 90.3  | 109.75 | 1.21539 | 0.173844 |  |
| Q5SQP8         | CTBP2  | C-terminal-binding protein 2<br>OS=Homo sapiens GN=CTBP2<br>PE=1 SV=1                                                                 | 10.72124756 | 5  | 6   | 2  | 513  | 56.066  | 6.96 | 96.8 | 83.8 | 117.7 | 101.7 | 90.3  | 109.7  | 1.21484 | 0.174945 |  |
| H9ZYJ2         | TXN    | Thioredoxin OS=Homo sapiens<br>GN=TXN PE=2 SV=1                                                                                       | 40          | 5  | 15  | 5  | 105  | 11.73   | 4.92 | 86.8 | 93.8 | 111.7 | 107.6 | 90.3  | 109.65 | 1.21429 | 0.176052 |  |
| Q9Y4C2         | TCAF1  | TRPM8 channel-associated factor<br>1 OS=Homo sapiens GN=TCAF1<br>PE=1 SV=3                                                            | 5.754614549 | 5  | 6   | 5  | 921  | 102.061 | 6.54 | 94   | 86.6 | 114.1 | 105.2 | 90.3  | 109.65 | 1.21429 | 0.176052 |  |

|                |              |                                                                                                                                       |             |   |   |   |      |         |       |      |      |       |       |       |        |         |          |
|----------------|--------------|---------------------------------------------------------------------------------------------------------------------------------------|-------------|---|---|---|------|---------|-------|------|------|-------|-------|-------|--------|---------|----------|
| A0A024R0<br>Q5 | PPP1R1<br>3L | Protein phosphatase 1, regulatory<br>(Inhibitor) subunit 13 like, isoform<br>CRA_a OS=Homo sapiens<br>GN=PPP1R13L PE=4 SV=1           | 11.11111111 | 8 | 8 | 8 | 828  | 89.036  | 6.81  | 85.2 | 95.4 | 110.9 | 108.4 | 90.3  | 109.65 | 1.21429 | 0.176052 |
| A0A024R8<br>A9 | USP20        | Ubiquitin specific peptidase 20,<br>isoform CRA_a OS=Homo sapiens<br>GN=USP20 PE=3 SV=1                                               | 0.982532751 | 1 | 1 | 1 | 916  | 102.181 | 6.21  | 87.4 | 93.3 | 112.6 | 106.7 | 90.35 | 109.65 | 1.21361 | 0.177403 |
| Q53EY9         |              | F-box only protein 22 isoform a<br>variant (Fragment) OS=Homo<br>sapiens PE=2 SV=1                                                    | 5.70719603  | 2 | 3 | 2 | 403  | 44.45   | 7.03  | 98.4 | 82.3 | 116   | 103.3 | 90.35 | 109.65 | 1.21361 | 0.177403 |
| Q53Y51         | DDT          | D-dopachrome tautomerase<br>OS=Homo sapiens GN=DDT PE=2<br>SV=1                                                                       | 38.98305085 | 4 | 7 | 4 | 118  | 12.704  | 7.3   | 96.4 | 84.3 | 119   | 100.3 | 90.35 | 109.65 | 1.21361 | 0.177403 |
| F5H039         | GPHN         | Gephyrin OS=Homo sapiens<br>GN=GPHN PE=1 SV=1                                                                                         | 6.393861893 | 3 | 3 | 3 | 782  | 84.681  | 5.73  | 95.8 | 84.9 | 111.8 | 107.5 | 90.35 | 109.65 | 1.21361 | 0.177403 |
| Q9Y3P9         | RABGA<br>P1  | Rab GTPase-activating protein 1<br>OS=Homo sapiens GN=RABGAP1<br>PE=1 SV=3                                                            | 7.296538821 | 6 | 6 | 6 | 1069 | 121.66  | 5.25  | 90.8 | 89.9 | 118.9 | 100.4 | 90.35 | 109.65 | 1.21361 | 0.177403 |
| A8KAM7         |              | cDNA FLJ75421, highly similar to<br>Homo sapiens lung seven<br>transmembrane receptor 1<br>(LUSTR1) mRNA OS=Homo<br>sapiens PE=2 SV=1 | 4.891304348 | 2 | 2 | 1 | 552  | 61.892  | 7.2   | 88.2 | 92.5 | 116.8 | 102.5 | 90.35 | 109.65 | 1.21361 | 0.177403 |
| B5BU16         | MAP2K6       | Mitogen-activated protein kinase<br>kinase 6 OS=Homo sapiens<br>GN=MAP2K6 PE=2 SV=1                                                   | 17.06586826 | 5 | 5 | 4 | 334  | 37.44   | 7.06  | 86.5 | 94.2 | 117.2 | 102.1 | 90.35 | 109.65 | 1.21361 | 0.177403 |
| A0A087W<br>TY1 | POLR1D       | DNA-directed RNA polymerases I<br>and III subunit RPAC2 OS=Homo<br>sapiens GN=POLR1D PE=1 SV=1                                        | 7.446808511 | 1 | 1 | 1 | 94   | 11.012  | 10.24 | 96.1 | 84.6 | 107.6 | 111.6 | 90.35 | 109.6  | 1.21306 | 0.178521 |
| Q9Y4X5         | ARIH1        | E3 ubiquitin-protein ligase ARIH1<br>OS=Homo sapiens GN=ARIH1<br>PE=1 SV=2                                                            | 12.38779174 | 6 | 6 | 6 | 557  | 64.076  | 5.08  | 88   | 92.8 | 106.3 | 113   | 90.4  | 109.65 | 1.21294 | 0.17876  |

|                |              |                                                                                                                      |             |    |    |    |      |         |      |      |      |       |       |       |        |         |          |
|----------------|--------------|----------------------------------------------------------------------------------------------------------------------|-------------|----|----|----|------|---------|------|------|------|-------|-------|-------|--------|---------|----------|
| A0A024R<br>A52 | PSMA2        | Proteasome subunit alpha type<br>OS=Homo sapiens GN=PSMA2<br>PE=1 SV=1                                               | 43.16239316 | 7  | 12 | 7  | 234  | 25.882  | 7.43 | 97.4 | 83.4 | 114.6 | 104.7 | 90.4  | 109.65 | 1.21294 | 0.17876  |
| Q13085         | ACACA        | Acetyl-CoA carboxylase 1<br>OS=Homo sapiens GN=ACACA<br>PE=1 SV=2                                                    | 12.36146633 | 23 | 26 | 23 | 2346 | 265.385 | 6.37 | 92.6 | 88.2 | 114.9 | 104.4 | 90.4  | 109.65 | 1.21294 | 0.17876  |
| A0A024R3<br>94 | CHORD<br>C1  | Cysteine and histidine-rich domain<br>(CHORD)-containing 1, isoform<br>CRA_c OS=Homo sapiens<br>GN=CHORDC1 PE=4 SV=1 | 32.8313253  | 9  | 14 | 9  | 332  | 37.51   | 7.72 | 89.8 | 91   | 105.2 | 114   | 90.4  | 109.6  | 1.21239 | 0.179885 |
| A0A109N<br>GN6 |              | Proteasome subunit alpha type<br>OS=Homo sapiens PE=2 SV=1                                                           | 51.0373444  | 8  | 19 | 8  | 241  | 26.394  | 4.79 | 98.2 | 82.6 | 113.7 | 105.5 | 90.4  | 109.6  | 1.21239 | 0.179885 |
| Q9Y6Y0         | IVNS1A<br>BP | Influenza virus NS1A-binding<br>protein OS=Homo sapiens<br>GN=IVNS1ABP PE=1 SV=3                                     | 1.713395639 | 1  | 1  | 1  | 642  | 71.683  | 5.53 | 97.3 | 83.5 | 116.2 | 103   | 90.4  | 109.6  | 1.21239 | 0.179885 |
| B0YJ89         | RIOK3        | RIO kinase 3 (Yeast), isoform<br>CRA_a OS=Homo sapiens<br>GN=RIOK3 PE=2 SV=1                                         | 6.358381503 | 2  | 2  | 2  | 519  | 59.055  | 5.76 | 96.5 | 84.3 | 113.7 | 105.5 | 90.4  | 109.6  | 1.21239 | 0.179885 |
| Q59EB2         |              | Putative uncharacterized protein<br>(Fragment) OS=Homo sapiens<br>PE=2 SV=1                                          | 4.756980352 | 4  | 4  | 4  | 967  | 109.498 | 7.33 | 90.5 | 90.3 | 110.3 | 108.8 | 90.4  | 109.55 | 1.21184 | 0.181016 |
| Q92963         | RIT1         | GTP-binding protein Rit1<br>OS=Homo sapiens GN=RIT1<br>PE=1 SV=1                                                     | 10.0456621  | 2  | 2  | 2  | 219  | 25.129  | 9.1  | 85.5 | 95.3 | 113.2 | 105.9 | 90.4  | 109.55 | 1.21184 | 0.181016 |
| P08243         | ASNS         | Asparagine synthetase [glutamine-<br>hydrolyzing] OS=Homo sapiens<br>GN=ASNS PE=1 SV=4                               | 17.11229947 | 8  | 10 | 2  | 561  | 64.329  | 6.86 | 88.1 | 92.8 | 109.6 | 109.6 | 90.45 | 109.6  | 1.21172 | 0.181256 |
| B2R6H7         |              | cDNA, FLJ92955, highly similar to<br>Homo sapiens transportin-SR<br>(TRN-SR), mRNA OS=Homo<br>sapiens PE=2 SV=1      | 7.908992416 | 6  | 9  | 6  | 923  | 104.164 | 5.57 | 92.9 | 88   | 112   | 107.1 | 90.45 | 109.55 | 1.21117 | 0.182394 |



|            |           |                                                                                                  |             |    |    |   |      |         |      |      |      |       |       |       |        |         |          |
|------------|-----------|--------------------------------------------------------------------------------------------------|-------------|----|----|---|------|---------|------|------|------|-------|-------|-------|--------|---------|----------|
| Q9UBQ5     | EIF3K     | Eukaryotic translation initiation factor 3 subunit K OS=Homo sapiens GN=EIF3K PE=1 SV=1          | 17.88990826 | 3  | 6  | 3 | 218  | 25.043  | 4.93 | 90   | 90.9 | 111.4 | 107.7 | 90.45 | 109.55 | 1.21117 | 0.182394 |
| A8K5T7     |           | cDNA FLJ75365, highly similar to Homo sapiens SUGT1B (SUGT1) mRNA OS=Homo sapiens PE=2 SV=1      | 29.04109589 | 8  | 9  | 8 | 365  | 41.026  | 5.16 | 89.9 | 91   | 109.8 | 109.3 | 90.45 | 109.55 | 1.21117 | 0.182394 |
| Q02952     | AKAP12    | A-kinase anchor protein 12 OS=Homo sapiens GN=AKAP12 PE=1 SV=4                                   | 0.673400673 | 1  | 1  | 1 | 1782 | 191.367 | 4.41 | 89.9 | 91   | 109.3 | 109.8 | 90.45 | 109.55 | 1.21117 | 0.182394 |
| A0A0K0K110 | HEL-S-265 | Epididymis secretory protein Li 265 OS=Homo sapiens GN=HEL-S-265 PE=2 SV=1                       | 31.33802817 | 10 | 16 | 4 | 284  | 32.846  | 4.77 | 97.1 | 83.8 | 117.1 | 102   | 90.45 | 109.55 | 1.21117 | 0.182394 |
| Q5T4F4     | ZFYVE27   | Protrudin OS=Homo sapiens GN=ZFYVE27 PE=1 SV=1                                                   | 8.759124088 | 2  | 2  | 2 | 411  | 45.814  | 5.15 | 95.7 | 85.2 | 119.4 | 99.7  | 90.45 | 109.55 | 1.21117 | 0.182394 |
| P30711     | GSTT1     | Glutathione S-transferase theta-1 OS=Homo sapiens GN=GSTT1 PE=1 SV=4                             | 8.333333333 | 2  | 2  | 2 | 240  | 27.318  | 7.49 | 94.8 | 86.1 | 116   | 103.1 | 90.45 | 109.55 | 1.21117 | 0.182394 |
| B7ZAC7     |           | cDNA, FLJ79141, highly similar to Nucleosome assembly protein 1-like 4 OS=Homo sapiens PE=2 SV=1 | 27.97927461 | 8  | 14 | 7 | 386  | 44.157  | 4.7  | 94   | 86.9 | 114.3 | 104.8 | 90.45 | 109.55 | 1.21117 | 0.182394 |
| U6EG95     | HLA-B     | MHC class I antigen (Fragment) OS=Homo sapiens GN=HLA-B PE=3 SV=1                                | 43.09392265 | 7  | 14 | 1 | 181  | 21.052  | 5.49 | 92.7 | 88.2 | 132.3 | 86.8  | 90.45 | 109.55 | 1.21117 | 0.182394 |
| Q8WVY7     | UBLCP1    | Ubiquitin-like domain-containing CTD phosphatase 1 OS=Homo sapiens GN=UBLCP1 PE=1 SV=2           | 2.830188679 | 1  | 1  | 1 | 318  | 36.781  | 6.46 | 88.5 | 92.4 | 116.3 | 102.8 | 90.45 | 109.55 | 1.21117 | 0.182394 |
| A4D198     | LOC392647 | Similar to mKIAA0038 protein OS=Homo sapiens GN=LOC392647 PE=4 SV=1                              | 9.523809524 | 3  | 6  | 3 | 294  | 32.584  | 8.87 | 86.8 | 94.1 | 114.7 | 104.4 | 90.45 | 109.55 | 1.21117 | 0.182394 |
| A8K6S3     |           | cDNA FLJ77570, highly similar to Homo sapiens pleckstrin homology                                | 17.20588235 | 11 | 11 | 1 | 680  | 77.827  | 6.7  | 85.7 | 95.2 | 117   | 102.1 | 90.45 | 109.55 | 1.21117 | 0.182394 |

|            |         |                                                                                                            |             |    |    |    |      |         |      |       |      |       |       |       |        |         |          |  |
|------------|---------|------------------------------------------------------------------------------------------------------------|-------------|----|----|----|------|---------|------|-------|------|-------|-------|-------|--------|---------|----------|--|
|            |         | domain containing, family C (with FERM domain) member 1 (PLEKHC1), mRNA OS=Homo sapiens PE=2 SV=1          |             |    |    |    |      |         |      |       |      |       |       |       |        |         |          |  |
| Q4LE65     | PIK3C2B | PIK3C2B variant protein (Fragment) OS=Homo sapiens GN=PIK3C2B variant protein PE=2 SV=1                    | 1.580547112 | 2  | 2  | 2  | 1645 | 185.814 | 7.24 | 85.4  | 95.5 | 110.5 | 108.5 | 90.45 | 109.5  | 1.21061 | 0.183537 |  |
| H9NL12     | IFITM3  | IFITM3 OS=Homo sapiens GN=IFITM3 PE=4 SV=1                                                                 | 30.82706767 | 3  | 16 | 1  | 133  | 14.654  | 7.01 | 106.1 | 74.9 | 110   | 109.1 | 90.5  | 109.55 | 1.2105  | 0.183778 |  |
| Q641Q2     | FAM21A  | WASH complex subunit FAM21A OS=Homo sapiens GN=FAM21A PE=1 SV=3                                            | 6.263982103 | 5  | 7  | 5  | 1341 | 147.095 | 4.81 | 86.7  | 94.3 | 114.1 | 105   | 90.5  | 109.55 | 1.2105  | 0.183778 |  |
| A0A0S2Z4G4 | TPM3    | Tropomyosin 3 isoform 1 (Fragment) OS=Homo sapiens GN=TPM3 PE=2 SV=1                                       | 48.38709677 | 15 | 25 | 11 | 248  | 29.015  | 4.78 | 93.9  | 87.1 | 110.3 | 108.7 | 90.5  | 109.5  | 1.20994 | 0.184927 |  |
| P23193     | TCEA1   | Transcription elongation factor A protein 1 OS=Homo sapiens GN=TCEA1 PE=1 SV=2                             | 22.59136213 | 5  | 7  | 5  | 301  | 33.948  | 8.38 | 91.6  | 89.4 | 112.9 | 106.1 | 90.5  | 109.5  | 1.20994 | 0.184927 |  |
| Q13867     | BLMH    | Bleomycin hydrolase OS=Homo sapiens GN=BLMH PE=1 SV=1                                                      | 18.02197802 | 7  | 8  | 7  | 455  | 52.528  | 6.27 | 91.3  | 89.7 | 112.3 | 106.7 | 90.5  | 109.5  | 1.20994 | 0.184927 |  |
| O15397     | IPO8    | Importin-8 OS=Homo sapiens GN=IPO8 PE=1 SV=2                                                               | 2.121504339 | 2  | 2  | 2  | 1037 | 119.861 | 5.16 | 89.9  | 91.1 | 113   | 106   | 90.5  | 109.5  | 1.20994 | 0.184927 |  |
| P27348     | YWHAQ   | 14-3-3 protein theta OS=Homo sapiens GN=YWHAQ PE=1 SV=1                                                    | 57.55102041 | 15 | 41 | 10 | 245  | 27.747  | 4.78 | 99.5  | 81.5 | 113.3 | 105.7 | 90.5  | 109.5  | 1.20994 | 0.184927 |  |
| P25788     | PSMA3   | Proteasome subunit alpha type-3 OS=Homo sapiens GN=PSMA3 PE=1 SV=2                                         | 39.60784314 | 9  | 14 | 9  | 255  | 28.415  | 5.33 | 98.3  | 82.7 | 114.4 | 104.6 | 90.5  | 109.5  | 1.20994 | 0.184927 |  |
| A8K8Z3     |         | cDNA FLJ77613, highly similar to Homo sapiens tousled-like kinase 1 (TLK1), mRNA OS=Homo sapiens PE=2 SV=1 | 2.219321149 | 2  | 2  | 1  | 766  | 86.616  | 8.72 | 91.7  | 89.3 | 116   | 103   | 90.5  | 109.5  | 1.20994 | 0.184927 |  |

|                |          |                                                                                                                      |             |    |    |    |      |        |      |      |      |       |       |       |        |         |          |
|----------------|----------|----------------------------------------------------------------------------------------------------------------------|-------------|----|----|----|------|--------|------|------|------|-------|-------|-------|--------|---------|----------|
| A0A059S4<br>M9 | ATP8     | ATP synthase protein 8 OS=Homo sapiens GN=ATP8 PE=3 SV=1                                                             | 39.70588235 | 3  | 20 | 1  | 68   | 7.916  | 9.91 | 85.8 | 95.2 | 114.4 | 104.6 | 90.5  | 109.5  | 1.20994 | 0.184927 |
| Q8IZ03         | IFIT2    | Interferon-induced protein with tetratricopeptide repeats 2 OS=Homo sapiens GN=IFIT2 PE=1 SV=2                       | 4.958677686 | 2  | 2  | 2  | 484  | 56.177 | 6.76 | 90.7 | 90.3 | 110.2 | 108.7 | 90.5  | 109.45 | 1.20939 | 0.186082 |
| Q4LE38         | IKBKAP   | IKBKAP variant protein (Fragment) OS=Homo sapiens GN=IKBKAP variant protein PE=2 SV=1                                | 12.44411326 | 12 | 12 | 12 | 1342 | 151.36 | 6    | 90.4 | 90.7 | 107   | 111.9 | 90.55 | 109.45 | 1.20872 | 0.187487 |
| Q9UNS2         | COPS3    | COP9 signalosome complex subunit 3 OS=Homo sapiens GN=COPS3 PE=1 SV=3                                                | 15.13002364 | 5  | 6  | 5  | 423  | 47.842 | 6.65 | 94.2 | 86.9 | 116.8 | 102.1 | 90.55 | 109.45 | 1.20872 | 0.187487 |
| D3DPK5         | SH3BGRL3 | SH3 domain binding glutamic acid-rich protein like 3, isoform CRA_a (Fragment) OS=Homo sapiens GN=SH3BGRL3 PE=4 SV=1 | 11.28404669 | 3  | 4  | 3  | 257  | 26.803 | 8.38 | 93.4 | 87.7 | 115.3 | 103.6 | 90.55 | 109.45 | 1.20872 | 0.187487 |
| Q6YP21         | KYAT3    | Kynurenine--oxoglutarate transaminase 3 OS=Homo sapiens GN=KYAT3 PE=1 SV=1                                           | 24.00881057 | 9  | 12 | 9  | 454  | 51.368 | 8.19 | 93.3 | 87.8 | 115.7 | 103.2 | 90.55 | 109.45 | 1.20872 | 0.187487 |
| Q96IR7         | HPDL     | 4-hydroxyphenylpyruvate dioxygenase-like protein OS=Homo sapiens GN=HPDL PE=1 SV=1                                   | 12.12938005 | 3  | 4  | 3  | 371  | 39.361 | 7.03 | 90.4 | 90.7 | 120.3 | 98.6  | 90.55 | 109.45 | 1.20872 | 0.187487 |
| Q5BJF2         | TMEM97   | Transmembrane protein 97 OS=Homo sapiens GN=TMEM97 PE=1 SV=1                                                         | 18.75       | 3  | 22 | 3  | 176  | 20.834 | 9.38 | 96.5 | 84.6 | 112.4 | 106.4 | 90.55 | 109.4  | 1.20817 | 0.188654 |
| O60232         | SSSCA1   | Sjoegren syndrome/scleroderma autoantigen 1 OS=Homo sapiens GN=SSSCA1 PE=1 SV=1                                      | 18.09045226 | 3  | 4  | 3  | 199  | 21.461 | 5.24 | 92.5 | 88.7 | 114.4 | 104.5 | 90.6  | 109.45 | 1.20806 | 0.188898 |
| V9HWG3         | HEL-S-45 | Epididymis secretory protein Li 45 OS=Homo sapiens GN=HEL-S-45 PE=2 SV=1                                             | 13.5371179  | 9  | 12 | 9  | 687  | 77.28  | 5.22 | 91.6 | 89.6 | 115.1 | 103.8 | 90.6  | 109.45 | 1.20806 | 0.188898 |

|                |             |                                                                                                                         |             |    |    |    |      |         |      |      |      |       |       |      |        |         |          |
|----------------|-------------|-------------------------------------------------------------------------------------------------------------------------|-------------|----|----|----|------|---------|------|------|------|-------|-------|------|--------|---------|----------|
| Q9P2J9         | PDP2        | [Pyruvate dehydrogenase [acetyl-<br>transferring]]-phosphatase 2,<br>mitochondrial OS=Homo sapiens<br>GN=PDP2 PE=2 SV=2 | 1.512287335 | 1  | 1  | 1  | 529  | 59.94   | 6.07 | 94.4 | 86.8 | 109.5 | 109.3 | 90.6 | 109.4  | 1.20751 | 0.190072 |
| P30622         | CLIP1       | CAP-Gly domain-containing linker<br>protein 1 OS=Homo sapiens<br>GN=CLIP1 PE=1 SV=2                                     | 13.69958275 | 19 | 20 | 18 | 1438 | 162.147 | 5.36 | 91.3 | 89.9 | 111.2 | 107.6 | 90.6 | 109.4  | 1.20751 | 0.190072 |
| P61221         | ABCE1       | ATP-binding cassette sub-family E<br>member 1 OS=Homo sapiens<br>GN=ABCE1 PE=1 SV=1                                     | 17.86310518 | 10 | 14 | 10 | 599  | 67.271  | 8.34 | 88.5 | 92.7 | 110.1 | 108.7 | 90.6 | 109.4  | 1.20751 | 0.190072 |
| Q9UI26         | IPO11       | Importin-11 OS=Homo sapiens<br>GN=IPO11 PE=1 SV=1                                                                       | 3.179487179 | 2  | 2  | 2  | 975  | 112.463 | 5.25 | 99.2 | 82   | 116.8 | 102   | 90.6 | 109.4  | 1.20751 | 0.190072 |
| Q5H924         | HUWE1       | HECT, UBA and WWE domain<br>containing 1 (Fragment) OS=Homo<br>sapiens GN=HUWE1 PE=4 SV=1                               | 12.18080423 | 31 | 44 | 1  | 3407 | 373.963 | 5.1  | 98.2 | 83   | 118.5 | 100.3 | 90.6 | 109.4  | 1.20751 | 0.190072 |
| Q5VWZ2         | LYPLAL<br>1 | Lysophospholipase-like protein 1<br>OS=Homo sapiens GN=LYPLAL1<br>PE=1 SV=3                                             | 4.219409283 | 1  | 1  | 1  | 237  | 26.299  | 7.84 | 94.2 | 87   | 119.2 | 99.6  | 90.6 | 109.4  | 1.20751 | 0.190072 |
| X6R8F3         | LCN2        | Neutrophil gelatinase-associated<br>lipocalin OS=Homo sapiens<br>GN=LCN2 PE=1 SV=1                                      | 8.5         | 1  | 1  | 1  | 200  | 22.774  | 8.5  | 88.9 | 92.3 | 90.6  | 128.2 | 90.6 | 109.4  | 1.20751 | 0.190072 |
| O60826         | CCDC22      | Coiled-coil domain-containing<br>protein 22 OS=Homo sapiens<br>GN=CCDC22 PE=1 SV=1                                      | 5.582137161 | 3  | 4  | 3  | 627  | 70.712  | 6.74 | 87.2 | 94   | 106.2 | 112.6 | 90.6 | 109.4  | 1.20751 | 0.190072 |
| P19827         | ITIH1       | Inter-alpha-trypsin inhibitor heavy<br>chain H1 OS=Homo sapiens<br>GN=ITIH1 PE=1 SV=3                                   | 1.427003293 | 1  | 2  | 1  | 911  | 101.326 | 6.79 | 81.8 | 99.4 | 96.6  | 122.2 | 90.6 | 109.4  | 1.20751 | 0.190072 |
| A0A087W<br>UB1 | CCDC12<br>9 | Coiled-coil domain-containing<br>protein 129 OS=Homo sapiens<br>GN=CCDC129 PE=4 SV=1                                    | 1.518026565 | 1  | 1  | 1  | 1054 | 116.436 | 5.31 | 77.2 | 104  | 110.7 | 108.1 | 90.6 | 109.4  | 1.20751 | 0.190072 |
| Q14520         | HABP2       | Hyaluronan-binding protein 2<br>OS=Homo sapiens GN=HABP2<br>PE=1 SV=1                                                   | 4.107142857 | 2  | 2  | 2  | 560  | 62.63   | 6.54 | 81.2 | 100  | 93.5  | 125.2 | 90.6 | 109.35 | 1.20695 | 0.191252 |

|                |             |                                                                                                                             |             |   |    |   |     |        |      |      |       |       |       |       |        |         |          |
|----------------|-------------|-----------------------------------------------------------------------------------------------------------------------------|-------------|---|----|---|-----|--------|------|------|-------|-------|-------|-------|--------|---------|----------|
| A0A140V<br>KE9 |             | Testis tissue sperm-binding protein<br>Li 66n OS=Homo sapiens PE=2<br>SV=1                                                  | 4.545454545 | 2 | 2  | 2 | 638 | 71.412 | 5.2  | 90.1 | 91.2  | 117.2 | 101.6 | 90.65 | 109.4  | 1.20684 | 0.191497 |
| Q9Y2V2         | CARHS<br>P1 | Calcium-regulated heat-stable<br>protein 1 OS=Homo sapiens<br>GN=CARHSP1 PE=1 SV=2                                          | 23.80952381 | 3 | 6  | 3 | 147 | 15.882 | 8.21 | 88.4 | 92.9  | 117   | 101.8 | 90.65 | 109.4  | 1.20684 | 0.191497 |
| Q9H3F6         | KCTD10      | BTB/POZ domain-containing<br>adapter for CUL3-mediated RhoA<br>degradation protein 3 OS=Homo<br>sapiens GN=KCTD10 PE=1 SV=1 | 13.09904153 | 4 | 5  | 3 | 313 | 35.41  | 6.34 | 94.6 | 86.7  | 112.6 | 106.1 | 90.65 | 109.35 | 1.20629 | 0.192683 |
| O00154         | ACOT7       | Cytosolic acyl coenzyme A<br>thioester hydrolase OS=Homo<br>sapiens GN=ACOT7 PE=1 SV=3                                      | 19.47368421 | 5 | 6  | 5 | 380 | 41.769 | 8.54 | 94.1 | 87.2  | 112.7 | 106   | 90.65 | 109.35 | 1.20629 | 0.192683 |
| I3L0M9         | TCEB2       | Transcription elongation factor B<br>polypeptide 2 (Fragment)<br>OS=Homo sapiens GN=TCEB2<br>PE=1 SV=1                      | 29.28571429 | 3 | 3  | 3 | 140 | 15.592 | 5.17 | 91   | 90.3  | 114.2 | 104.5 | 90.65 | 109.35 | 1.20629 | 0.192683 |
| A0A024R1<br>S8 | LASP1       | LIM and SH3 protein 1, isoform<br>CRA_b OS=Homo sapiens<br>GN=LASP1 PE=4 SV=1                                               | 28.35249042 | 7 | 14 | 7 | 261 | 29.698 | 7.05 | 86   | 95.3  | 112.3 | 106.4 | 90.65 | 109.35 | 1.20629 | 0.192683 |
| P49773         | HINT1       | Histidine triad nucleotide-binding<br>protein 1 OS=Homo sapiens<br>GN=HINT1 PE=1 SV=2                                       | 42.85714286 | 4 | 6  | 4 | 126 | 13.793 | 6.95 | 81.8 | 99.5  | 111.6 | 107.1 | 90.65 | 109.35 | 1.20629 | 0.192683 |
| Q9H773         | DCTPP1      | dCTP pyrophosphatase 1<br>OS=Homo sapiens GN=DCTPP1<br>PE=1 SV=1                                                            | 31.76470588 | 3 | 3  | 3 | 170 | 18.669 | 5.03 | 96.9 | 84.4  | 113.8 | 104.8 | 90.65 | 109.3  | 1.20574 | 0.193875 |
| A0A024R9<br>15 | ACBD6       | Acyl-Coenzyme A binding domain<br>containing 6, isoform CRA_a<br>OS=Homo sapiens GN=ACBD6<br>PE=4 SV=1                      | 4.255319149 | 1 | 1  | 1 | 282 | 31.131 | 5.11 | 84.9 | 96.4  | 112   | 106.6 | 90.65 | 109.3  | 1.20574 | 0.193875 |
| B7ZMD7         | AMY1A       | Alpha-amylase OS=Homo sapiens<br>GN=AMY1A PE=2 SV=1                                                                         | 6.849315068 | 3 | 3  | 3 | 511 | 57.717 | 6.93 | 81   | 100.3 | 96    | 122.6 | 90.65 | 109.3  | 1.20574 | 0.193875 |

|        |        |                                                                              |             |    |    |    |      |         |      |      |       |       |       |       |        |         |          |
|--------|--------|------------------------------------------------------------------------------|-------------|----|----|----|------|---------|------|------|-------|-------|-------|-------|--------|---------|----------|
| Q92905 | COPS5  | COP9 signalosome complex subunit 5 OS=Homo sapiens GN=COPS5 PE=1 SV=4        | 29.04191617 | 8  | 12 | 8  | 334  | 37.555  | 6.54 | 92.3 | 89.1  | 114.7 | 104   | 90.7  | 109.35 | 1.20562 | 0.194122 |
| P41236 | PPP1R2 | Protein phosphatase inhibitor 2 OS=Homo sapiens GN=PPP1R2 PE=1 SV=2          | 17.56097561 | 3  | 3  | 3  | 205  | 23.001  | 4.74 | 89.5 | 91.9  | 108.6 | 110   | 90.7  | 109.3  | 1.20507 | 0.19532  |
| Q6IN84 | MRM1   | rRNA methyltransferase 1, mitochondrial OS=Homo sapiens GN=MRM1 PE=1 SV=1    | 10.19830028 | 3  | 6  | 3  | 353  | 38.614  | 7.94 | 92.4 | 89    | 127.1 | 91.5  | 90.7  | 109.3  | 1.20507 | 0.19532  |
| Q96RR1 | PEO1   | Twinkle protein, mitochondrial OS=Homo sapiens GN=PEO1 PE=1 SV=1             | 1.461988304 | 1  | 1  | 1  | 684  | 77.106  | 8.98 | 87.7 | 93.7  | 93.6  | 125   | 90.7  | 109.3  | 1.20507 | 0.19532  |
| A6NMQ1 | POLA1  | DNA polymerase OS=Homo sapiens GN=POLA1 PE=1 SV=1                            | 6.471389646 | 9  | 11 | 9  | 1468 | 166.351 | 5.81 | 91.8 | 89.6  | 114   | 104.5 | 90.7  | 109.25 | 1.20452 | 0.196525 |
| P17812 | CTPS1  | CTP synthase 1 OS=Homo sapiens GN=CTPS1 PE=1 SV=2                            | 22.67343486 | 12 | 15 | 10 | 591  | 66.648  | 6.46 | 95.3 | 86.2  | 111.8 | 106.8 | 90.75 | 109.3  | 1.20441 | 0.196772 |
| Q9Y266 | NUDC   | Nuclear migration protein nudC OS=Homo sapiens GN=NUDC PE=1 SV=1             | 40.18126888 | 14 | 27 | 14 | 331  | 38.219  | 5.38 | 85.4 | 96.1  | 109.2 | 109.4 | 90.75 | 109.3  | 1.20441 | 0.196772 |
| Q5VW32 | BROX   | BRO1 domain-containing protein BROX OS=Homo sapiens GN=BROX PE=1 SV=1        | 5.839416058 | 2  | 3  | 2  | 411  | 46.447  | 7.65 | 91.1 | 90.4  | 113.3 | 105.2 | 90.75 | 109.25 | 1.20386 | 0.197984 |
| O14562 | UBFD1  | Ubiquitin domain-containing protein UBFD1 OS=Homo sapiens GN=UBFD1 PE=1 SV=2 | 3.55987055  | 1  | 1  | 1  | 309  | 33.361  | 5.77 | 96.9 | 84.6  | 110.3 | 108.2 | 90.75 | 109.25 | 1.20386 | 0.197984 |
| Q05932 | FPGS   | Folypolyglutamate synthase, mitochondrial OS=Homo sapiens GN=FPGS PE=1 SV=3  | 4.429301533 | 2  | 2  | 2  | 587  | 64.568  | 7.94 | 87.2 | 94.3  | 105.3 | 113.2 | 90.75 | 109.25 | 1.20386 | 0.197984 |
| P02533 | KRT14  | Keratin, type I cytoskeletal 14 OS=Homo sapiens GN=KRT14 PE=1 SV=4           | 32.41525424 | 21 | 76 | 1  | 472  | 51.529  | 5.16 | 79.4 | 102.1 | 112.1 | 106.4 | 90.75 | 109.25 | 1.20386 | 0.197984 |

|             |                |                                                                                                                      |             |    |    |    |     |        |      |      |      |       |       |       |        |         |          |
|-------------|----------------|----------------------------------------------------------------------------------------------------------------------|-------------|----|----|----|-----|--------|------|------|------|-------|-------|-------|--------|---------|----------|
| Q53HB3      |                | Proteasome 26S ATPase subunit 1 variant (Fragment) OS=Homo sapiens PE=1 SV=1                                         | 47.27272727 | 18 | 31 | 17 | 440 | 49.182 | 6.21 | 93.2 | 88.3 | 113.5 | 104.9 | 90.75 | 109.2  | 1.20331 | 0.199201 |
| Q5U077      | LDHB           | L-lactate dehydrogenase OS=Homo sapiens GN=LDHB PE=2 SV=1                                                            | 42.21556886 | 13 | 47 | 12 | 334 | 36.615 | 6.05 | 92.3 | 89.3 | 109.4 | 109.1 | 90.8  | 109.25 | 1.20319 | 0.199449 |
| Q5T1V6      | DDX59          | Probable ATP-dependent RNA helicase DDX59 OS=Homo sapiens GN=DDX59 PE=1 SV=1                                         | 1.938610662 | 1  | 2  | 1  | 619 | 68.766 | 7.44 | 89.3 | 92.3 | 105.5 | 112.9 | 90.8  | 109.2  | 1.20264 | 0.200673 |
| A0A024R B62 | METTL1         | tRNA (guanine-N(7)-methyltransferase OS=Homo sapiens GN=METTL1 PE=3 SV=1                                             | 12.95681063 | 2  | 2  | 2  | 301 | 34.071 | 7.9  | 97.4 | 84.2 | 108.4 | 110   | 90.8  | 109.2  | 1.20264 | 0.200673 |
| E5KNQ5      | TK2            | Mitochondrial thymidine kinase 2 OS=Homo sapiens GN=TK2 PE=1 SV=1                                                    | 7.166123779 | 2  | 2  | 2  | 307 | 35.39  | 9.5  | 96   | 85.6 | 113.4 | 105   | 90.8  | 109.2  | 1.20264 | 0.200673 |
| Q96DM3      | C18orf8        | Uncharacterized protein C18orf8 OS=Homo sapiens GN=C18orf8 PE=1 SV=2                                                 | 3.652968037 | 2  | 2  | 2  | 657 | 74.927 | 7.83 | 92.4 | 89.2 | 123.3 | 95.1  | 90.8  | 109.2  | 1.20264 | 0.200673 |
| K7EIK7      | EML2           | Echinoderm microtubule-associated protein-like 2 OS=Homo sapiens GN=EML2 PE=1 SV=1                                   | 12.93661061 | 9  | 10 | 3  | 773 | 84.676 | 6.87 | 91.9 | 89.7 | 115.6 | 102.8 | 90.8  | 109.2  | 1.20264 | 0.200673 |
| Q6AW98      | DKFZp686P13170 | Putative uncharacterized protein DKFZp686P13170 OS=Homo sapiens GN=DKFZp686P13170 PE=2 SV=1                          | 1.741293532 | 1  | 1  | 1  | 402 | 45.998 | 9.88 | 90.4 | 91.2 | 116.8 | 101.6 | 90.8  | 109.2  | 1.20264 | 0.200673 |
| P20618      | PSMB1          | Proteasome subunit beta type-1 OS=Homo sapiens GN=PSMB1 PE=1 SV=2                                                    | 22.82157676 | 4  | 6  | 4  | 241 | 26.472 | 8.13 | 87.6 | 94   | 104.9 | 113.5 | 90.8  | 109.2  | 1.20264 | 0.200673 |
| A8K5M4      |                | cDNA FLJ75088, highly similar to Homo sapiens p21 (CDKN1A)-activated kinase 2 (PAK2), mRNA OS=Homo sapiens PE=2 SV=1 | 38.35877863 | 15 | 20 | 15 | 524 | 58.007 | 5.85 | 85.3 | 96.3 | 110.5 | 107.9 | 90.8  | 109.2  | 1.20264 | 0.200673 |

|            |          |                                                                                                     |             |   |   |   |     |        |      |      |       |       |       |       |        |         |          |
|------------|----------|-----------------------------------------------------------------------------------------------------|-------------|---|---|---|-----|--------|------|------|-------|-------|-------|-------|--------|---------|----------|
| A0A059QB80 | ATP6     | ATP synthase subunit a OS=Homo sapiens GN=ATP6 PE=4 SV=1                                            | 4.424778761 | 1 | 1 | 1 | 226 | 24.744 | 10.1 | 84.5 | 97.1  | 99.4  | 119   | 90.8  | 109.2  | 1.20264 | 0.200673 |
| B4DPQ0     | C1R      | Complement C1r subcomponent OS=Homo sapiens GN=C1R PE=1 SV=1                                        | 1.112656467 | 1 | 1 | 1 | 719 | 81.837 | 6.37 | 80   | 101.6 | 99.4  | 119   | 90.8  | 109.2  | 1.20264 | 0.200673 |
| Q96EK6     | GNPNA T1 | Glucosamine 6-phosphate N-acetyltransferase OS=Homo sapiens GN=GNPNAT1 PE=1 SV=1                    | 24.45652174 | 3 | 4 | 3 | 184 | 20.736 | 7.99 | 95.1 | 86.6  | 116.4 | 102   | 90.85 | 109.2  | 1.20198 | 0.202152 |
| Q9H1B7     | IRF2BPL  | Interferon regulatory factor 2-binding protein-like OS=Homo sapiens GN=IRF2BPL PE=1 SV=1            | 2.386934673 | 2 | 2 | 1 | 796 | 82.607 | 8.24 | 96.3 | 85.4  | 110.2 | 108.1 | 90.85 | 109.15 | 1.20143 | 0.203389 |
| B4DZK0     |          | cDNA FLJ56391, highly similar to Cysteine protease ATG4B (EC 3.4.22.-) OS=Homo sapiens PE=2 SV=1    | 3.333333333 | 1 | 1 | 1 | 510 | 57.284 | 8.53 | 83.4 | 98.3  | 104.7 | 113.6 | 90.85 | 109.15 | 1.20143 | 0.203389 |
| Q06609     | RAD51    | DNA repair protein RAD51 homolog 1 OS=Homo sapiens GN=RAD51 PE=1 SV=1                               | 6.784660767 | 2 | 2 | 2 | 339 | 36.943 | 5.6  | 91.6 | 90.1  | 115.3 | 102.9 | 90.85 | 109.1  | 1.20088 | 0.204632 |
| K7PML8     | CDKN2A   | Cyclin-dependent kinase inhibitor 2A OS=Homo sapiens GN=CDKN2A PE=2 SV=1                            | 32.69230769 | 3 | 4 | 2 | 156 | 16.522 | 5.81 | 89   | 92.7  | 104.3 | 113.9 | 90.85 | 109.1  | 1.20088 | 0.204632 |
| H3BM91     | COMMD4   | COMM domain-containing protein 4 (Fragment) OS=Homo sapiens GN=COMMD4 PE=1 SV=1                     | 3.317535545 | 1 | 1 | 1 | 211 | 22.749 | 7.9  | 89.6 | 92.2  | 111.9 | 106.4 | 90.9  | 109.15 | 1.20077 | 0.204882 |
| B4DF04     |          | cDNA FLJ55807, highly similar to Neurogenic locus notch homolog protein 2 OS=Homo sapiens PE=2 SV=1 | 8.641975309 | 2 | 3 | 1 | 243 | 26.448 | 5.94 | 74.5 | 107.3 | 77.8  | 140.5 | 90.9  | 109.15 | 1.20077 | 0.204882 |
| D3DND1     | CDV3     | CDV3 homolog (Mouse), isoform CRA_a OS=Homo sapiens GN=CDV3 PE=4 SV=1                               | 33.72093023 | 6 | 9 | 6 | 258 | 28.581 | 9.44 | 93.6 | 88.2  | 111.1 | 107.1 | 90.9  | 109.1  | 1.20022 | 0.206131 |



|                |        |                                                                                                              |             |    |     |    |      |         |      |      |      |       |       |       |        |         |          |
|----------------|--------|--------------------------------------------------------------------------------------------------------------|-------------|----|-----|----|------|---------|------|------|------|-------|-------|-------|--------|---------|----------|
| P78371         | CCT2   | T-complex protein 1 subunit beta<br>OS=Homo sapiens GN=CCT2<br>PE=1 SV=4                                     | 61.4953271  | 29 | 65  | 29 | 535  | 57.452  | 6.46 | 91   | 90.8 | 108.6 | 109.6 | 90.9  | 109.1  | 1.20022 | 0.206131 |
| A0A140V<br>KC8 |        | Testis tissue sperm-binding protein<br>Li 45a OS=Homo sapiens PE=2<br>SV=1                                   | 14.01869159 | 3  | 3   | 3  | 321  | 35.87   | 6.6  | 93.5 | 88.3 | 113.7 | 104.5 | 90.9  | 109.1  | 1.20022 | 0.206131 |
| P23921         | RRM1   | Ribonucleoside-diphosphate<br>reductase large subunit OS=Homo<br>sapiens GN=RRM1 PE=1 SV=1                   | 48.61111111 | 32 | 107 | 32 | 792  | 90.013  | 7.15 | 91.2 | 90.6 | 114.2 | 104   | 90.9  | 109.1  | 1.20022 | 0.206131 |
| Q06210         | GFPT1  | Glutamine--fructose-6-phosphate<br>aminotransferase [isomerizing] 1<br>OS=Homo sapiens GN=GFPT1<br>PE=1 SV=3 | 28.46924177 | 16 | 20  | 12 | 699  | 78.756  | 7.11 | 89.6 | 92.2 | 111.5 | 106.6 | 90.9  | 109.05 | 1.19967 | 0.207387 |
| Q59EE8         |        | Nuclear receptor coactivator 3<br>isoform a variant (Fragment)<br>OS=Homo sapiens PE=2 SV=1                  | 1.331464611 | 1  | 1   | 1  | 1427 | 155.558 | 7.56 | 93.5 | 88.4 | 112.2 | 105.9 | 90.95 | 109.05 | 1.19901 | 0.2089   |
| P36954         | POLR2I | DNA-directed RNA polymerase II<br>subunit RPB9 OS=Homo sapiens<br>GN=POLR2I PE=1 SV=1                        | 8.8         | 1  | 1   | 1  | 125  | 14.514  | 5.14 | 93   | 88.9 | 112.2 | 105.9 | 90.95 | 109.05 | 1.19901 | 0.2089   |
| O00151         | PDLIM1 | PDZ and LIM domain protein 1<br>OS=Homo sapiens GN=PDLIM1<br>PE=1 SV=4                                       | 56.83890578 | 14 | 19  | 14 | 329  | 36.049  | 7.02 | 91.8 | 90.1 | 108.9 | 109.2 | 90.95 | 109.05 | 1.19901 | 0.2089   |
| P49662         | CASP4  | Caspase-4 OS=Homo sapiens<br>GN=CASP4 PE=1 SV=1                                                              | 4.24403183  | 2  | 2   | 2  | 377  | 43.235  | 6    | 90.6 | 91.3 | 115.1 | 103   | 90.95 | 109.05 | 1.19901 | 0.2089   |
| P07737         | PFN1   | Profilin-1 OS=Homo sapiens<br>GN=PFN1 PE=1 SV=2                                                              | 78.57142857 | 10 | 41  | 10 | 140  | 15.045  | 8.27 | 87   | 94.9 | 111.8 | 106.3 | 90.95 | 109.05 | 1.19901 | 0.2089   |
| B2RBY4         |        | DNA primase OS=Homo sapiens<br>PE=2 SV=1                                                                     | 12.38095238 | 5  | 7   | 5  | 420  | 49.924  | 8.38 | 97.2 | 84.7 | 125.1 | 92.9  | 90.95 | 109    | 1.19846 | 0.210168 |
| Q9H649         | NSUN3  | Putative methyltransferase NSUN3<br>OS=Homo sapiens GN=NSUN3<br>PE=2 SV=1                                    | 6.176470588 | 2  | 2   | 2  | 340  | 38.22   | 8.87 | 93.4 | 88.5 | 111   | 107   | 90.95 | 109    | 1.19846 | 0.210168 |
| O00767         | SCD    | Acyl-CoA desaturase OS=Homo<br>sapiens GN=SCD PE=1 SV=2                                                      | 17.54874652 | 5  | 9   | 5  | 359  | 41.496  | 9    | 82.4 | 99.5 | 95.9  | 122.1 | 90.95 | 109    | 1.19846 | 0.210168 |

|                |         |                                                                                                                                                                                          |             |    |    |    |      |         |      |      |      |       |       |       |        |         |          |
|----------------|---------|------------------------------------------------------------------------------------------------------------------------------------------------------------------------------------------|-------------|----|----|----|------|---------|------|------|------|-------|-------|-------|--------|---------|----------|
| Q14376         | GALE    | UDP-glucose 4-epimerase<br>OS=Homo sapiens GN=GALE<br>PE=1 SV=2                                                                                                                          | 10.34482759 | 2  | 4  | 2  | 348  | 38.257  | 6.73 | 99.5 | 82.5 | 111.5 | 106.6 | 91    | 109.05 | 1.19835 | 0.210421 |
| O14980         | XPO1    | Exportin-1 OS=Homo sapiens<br>GN=XPO1 PE=1 SV=1                                                                                                                                          | 20.35480859 | 18 | 30 | 18 | 1071 | 123.306 | 6.06 | 98.3 | 83.7 | 112.9 | 105.1 | 91    | 109    | 1.1978  | 0.211695 |
| Q9P2K8         | EIF2AK4 | eIF-2-alpha kinase GCN2<br>OS=Homo sapiens GN=EIF2AK4<br>PE=1 SV=3                                                                                                                       | 1.394784718 | 2  | 2  | 2  | 1649 | 186.794 | 6.28 | 94.7 | 87.3 | 111.3 | 106.7 | 91    | 109    | 1.1978  | 0.211695 |
| Q59EV7         |         | Transporter (Fragment) OS=Homo<br>sapiens PE=2 SV=1                                                                                                                                      | 2.01863354  | 1  | 1  | 1  | 644  | 71.382  | 6.99 | 88.5 | 93.5 | 110   | 108   | 91    | 109    | 1.1978  | 0.211695 |
| A0A024R<br>A11 | ACTR3   | ARP3 actin-related protein 3<br>homolog (Yeast), isoform CRA_a<br>OS=Homo sapiens GN=ACTR3<br>PE=3 SV=1                                                                                  | 30.86124402 | 9  | 16 | 2  | 418  | 47.341  | 5.88 | 91.7 | 90.3 | 115.9 | 102   | 91    | 108.95 | 1.19725 | 0.212976 |
| A0A0S2Z5<br>00 | OPTN    | Optineurin isoform 1 (Fragment)<br>OS=Homo sapiens GN=OPTN<br>PE=2 SV=1                                                                                                                  | 4.506065858 | 3  | 3  | 3  | 577  | 65.88   | 5.24 | 86.4 | 95.6 | 114.8 | 103.1 | 91    | 108.95 | 1.19725 | 0.212976 |
| G3V5Z7         | PSMA6   | Proteasome subunit alpha type<br>OS=Homo sapiens GN=PSMA6<br>PE=1 SV=1                                                                                                                   | 43.25396825 | 10 | 25 | 10 | 252  | 28.129  | 6.76 | 95.6 | 86.5 | 114.8 | 103.2 | 91.05 | 109    | 1.19714 | 0.21323  |
| Q14222         | EEF1A   | EEF1A protein (Fragment)<br>OS=Homo sapiens GN=EEF1A<br>PE=2 SV=1                                                                                                                        | 31.71806167 | 4  | 40 | 1  | 227  | 24.181  | 9.58 | 95.6 | 86.5 | 113.4 | 104.5 | 91.05 | 108.95 | 1.1966  | 0.214517 |
| V9HW90         | HEL-75  | Epididymis luminal protein 75<br>OS=Homo sapiens GN=HEL-75<br>PE=2 SV=1                                                                                                                  | 17.04980843 | 5  | 7  | 5  | 522  | 56.221  | 8.5  | 94.3 | 87.8 | 112.1 | 105.8 | 91.05 | 108.95 | 1.1966  | 0.214517 |
| B2R7P8         |         | cDNA, FLJ93545, highly similar to<br>Homo sapiens 5-aminoimidazole-<br>4-carboxamide ribonucleotide<br>formyltransferase/IMP<br>cyclohydrolase (ATIC), mRNA<br>OS=Homo sapiens PE=2 SV=1 | 46.4527027  | 20 | 32 | 20 | 592  | 64.594  | 6.8  | 94.2 | 87.9 | 110.3 | 107.6 | 91.05 | 108.95 | 1.1966  | 0.214517 |

|             |              |                                                                                                                 |             |    |     |    |      |         |      |       |      |       |       |       |        |         |          |
|-------------|--------------|-----------------------------------------------------------------------------------------------------------------|-------------|----|-----|----|------|---------|------|-------|------|-------|-------|-------|--------|---------|----------|
| O00764      | PDXK         | Pyridoxal kinase OS=Homo sapiens GN=PDXK PE=1 SV=1                                                              | 18.26923077 | 5  | 6   | 5  | 312  | 35.08   | 6.13 | 92.6  | 89.5 | 107   | 110.9 | 91.05 | 108.95 | 1.1966  | 0.214517 |
| Q9NS87      | KIF15        | Kinesin-like protein KIF15 OS=Homo sapiens GN=KIF15 PE=1 SV=1                                                   | 0.936599424 | 1  | 1   | 1  | 1388 | 160.061 | 6    | 91.2  | 90.9 | 110.4 | 107.5 | 91.05 | 108.95 | 1.1966  | 0.214517 |
| Q4LE43      | PLCG1        | Phosphoinositide phospholipase C (Fragment) OS=Homo sapiens GN=PLCG1 variant protein PE=2 SV=1                  | 0.920679887 | 1  | 1   | 1  | 1412 | 161.201 | 7.18 | 89.5  | 92.6 | 103.6 | 114.3 | 91.05 | 108.95 | 1.1966  | 0.214517 |
| P61086      | UBE2K        | Ubiquitin-conjugating enzyme E2 K OS=Homo sapiens GN=UBE2K PE=1 SV=3                                            | 15.5        | 3  | 5   | 3  | 200  | 22.393  | 5.44 | 87.6  | 94.5 | 111.2 | 106.7 | 91.05 | 108.95 | 1.1966  | 0.214517 |
| A0A024R5 Q1 | hCG_20 03792 | HCG2003792, isoform CRA_b OS=Homo sapiens GN=hCG_2003792 PE=4 SV=1                                              | 19.37984496 | 2  | 2   | 2  | 129  | 14.656  | 4.93 | 103.4 | 78.7 | 108.7 | 109.1 | 91.05 | 108.9  | 1.19605 | 0.215811 |
| A8K7H4      |              | Origin recognition complex subunit 4 OS=Homo sapiens PE=2 SV=1                                                  | 12.8440367  | 5  | 7   | 5  | 436  | 50.361  | 7.96 | 94.1  | 88   | 108.4 | 109.4 | 91.05 | 108.9  | 1.19605 | 0.215811 |
| A8K8D2      |              | cDNA FLJ77371, highly similar to Homo sapiens MLF1 interacting protein (MLF1IP), mRNA OS=Homo sapiens PE=2 SV=1 | 2.392344498 | 1  | 1   | 1  | 418  | 47.539  | 9.13 | 93.3  | 88.8 | 106.7 | 111.1 | 91.05 | 108.9  | 1.19605 | 0.215811 |
| P55060      | CSE1L        | Exportin-2 OS=Homo sapiens GN=CSE1L PE=1 SV=3                                                                   | 26.26158599 | 22 | 33  | 22 | 971  | 110.346 | 5.77 | 93    | 89.1 | 107   | 110.8 | 91.05 | 108.9  | 1.19605 | 0.215811 |
| D9IAI1      | PEBP1        | Epididymis secretory protein Li 34 OS=Homo sapiens GN=PEBP1 PE=2 SV=1                                           | 58.28877005 | 7  | 15  | 7  | 187  | 21.044  | 7.53 | 88.7  | 93.4 | 109.9 | 107.9 | 91.05 | 108.9  | 1.19605 | 0.215811 |
| E9PK54      | HSPA8        | Heat shock cognate 71 kDa protein (Fragment) OS=Homo sapiens GN=HSPA8 PE=1 SV=8                                 | 93.44262295 | 15 | 135 | 1  | 183  | 19.943  | 7.33 | 96.6  | 85.6 | 113   | 104.9 | 91.1  | 108.95 | 1.19594 | 0.216065 |
| J3QQX2      | ARHGDI A     | Rho GDP-dissociation inhibitor 1 OS=Homo sapiens GN=ARHGDI A PE=1 SV=1                                          | 31.91489362 | 5  | 7   | 5  | 235  | 25.815  | 7.44 | 96    | 86.2 | 113.2 | 104.6 | 91.1  | 108.9  | 1.19539 | 0.217366 |

|                |              |                                                                                                                                                              |             |    |    |    |     |         |      |      |      |       |       |       |        |         |          |
|----------------|--------------|--------------------------------------------------------------------------------------------------------------------------------------------------------------|-------------|----|----|----|-----|---------|------|------|------|-------|-------|-------|--------|---------|----------|
| A0A024R4<br>U3 | TTLL12       | Tubulin tyrosine ligase-like family,<br>member 12, isoform CRA_a<br>OS=Homo sapiens GN=TTLL12<br>PE=4 SV=1                                                   | 24.53416149 | 12 | 14 | 12 | 644 | 74.356  | 5.53 | 93   | 89.2 | 110.7 | 107.1 | 91.1  | 108.9  | 1.19539 | 0.217366 |
| Q8N3F8         | MICALL<br>1  | MICAL-like protein 1 OS=Homo<br>sapiens GN=MICALL1 PE=1 SV=2                                                                                                 | 1.622247972 | 1  | 1  | 1  | 863 | 93.383  | 7.25 | 87.7 | 94.5 | 110.9 | 106.9 | 91.1  | 108.9  | 1.19539 | 0.217366 |
| B1AHB0         | MCM5         | DNA helicase OS=Homo sapiens<br>GN=MCM5 PE=2 SV=1                                                                                                            | 44.95912807 | 28 | 44 | 28 | 734 | 82.233  | 8.37 | 93.4 | 88.8 | 112.6 | 105.1 | 91.1  | 108.85 | 1.19484 | 0.218673 |
| M0R2C6         |              | Uncharacterized protein<br>(Fragment) OS=Homo sapiens<br>PE=4 SV=1                                                                                           | 33.50340136 | 14 | 22 | 1  | 588 | 65.718  | 6.54 | 90.5 | 91.7 | 103.3 | 114.4 | 91.1  | 108.85 | 1.19484 | 0.218673 |
| H0YBH7         | SARAF        | Store-operated calcium entry-<br>associated regulatory factor<br>(Fragment) OS=Homo sapiens<br>GN=SARAF PE=1 SV=1                                            | 14.98559078 | 4  | 4  | 4  | 347 | 37.854  | 5.34 | 89.1 | 93.1 | 110.2 | 107.5 | 91.1  | 108.85 | 1.19484 | 0.218673 |
| A8K9D8         |              | cDNA FLJ78129, highly similar to<br>Homo sapiens reversion-inducing-<br>cysteine-rich protein with kazal<br>motifs (RECK), mRNA OS=Homo<br>sapiens PE=2 SV=1 | 0.926879506 | 1  | 1  | 1  | 971 | 106.387 | 6.68 | 88.3 | 94   | 110.1 | 107.7 | 91.15 | 108.9  | 1.19473 | 0.218928 |
| V9HW41         | HEL-S-<br>71 | Epididymis secretory protein Li 71<br>OS=Homo sapiens GN=HEL-S-71<br>PE=2 SV=1                                                                               | 31.57894737 | 5  | 7  | 5  | 152 | 17.127  | 6.57 | 92.2 | 90.1 | 115.1 | 102.6 | 91.15 | 108.85 | 1.19419 | 0.220242 |
| Q9Y5X3         | SNX5         | Sorting nexin-5 OS=Homo sapiens<br>GN=SNX5 PE=1 SV=1                                                                                                         | 28.71287129 | 10 | 12 | 9  | 404 | 46.787  | 6.76 | 90.1 | 92.2 | 111.3 | 106.4 | 91.15 | 108.85 | 1.19419 | 0.220242 |
| B3KUL5         |              | Oxysterol-binding protein<br>OS=Homo sapiens PE=2 SV=1                                                                                                       | 4.842931937 | 3  | 4  | 2  | 764 | 83.89   | 8.31 | 84.1 | 98.2 | 113.1 | 104.6 | 91.15 | 108.85 | 1.19419 | 0.220242 |
| Q96K49         | TMEM8<br>7B  | Transmembrane protein 87B<br>OS=Homo sapiens GN=TMEM87B<br>PE=1 SV=1                                                                                         | 2.162162162 | 1  | 2  | 1  | 555 | 63.495  | 7.44 | 99.5 | 82.9 | 111.3 | 106.4 | 91.2  | 108.85 | 1.19353 | 0.221818 |
| A0A140V<br>K41 |              | Testicular secretory protein Li 41<br>OS=Homo sapiens PE=2 SV=1                                                                                              | 44.23676012 | 11 | 20 | 6  | 321 | 35.032  | 6.46 | 96.8 | 85.6 | 115.2 | 102.4 | 91.2  | 108.8  | 1.19298 | 0.223144 |

|            |         |                                                                                                    |             |    |    |    |      |         |      |       |       |       |       |       |        |         |          |
|------------|---------|----------------------------------------------------------------------------------------------------|-------------|----|----|----|------|---------|------|-------|-------|-------|-------|-------|--------|---------|----------|
| J9R021     | eIF3a   | Eukaryotic translation initiation factor 3 subunit A OS=Homo sapiens GN=eIF3a PE=2 SV=1            | 17.87264834 | 25 | 37 | 25 | 1382 | 166.381 | 6.79 | 95.6  | 86.8  | 111.5 | 106.1 | 91.2  | 108.8  | 1.19298 | 0.223144 |
| P36639     | NUDT1   | 7,8-dihydro-8-oxoguanine triphosphatase OS=Homo sapiens GN=NUDT1 PE=1 SV=3                         | 7.614213198 | 1  | 1  | 1  | 197  | 22.505  | 5.27 | 91.7  | 90.7  | 117.5 | 100.1 | 91.2  | 108.8  | 1.19298 | 0.223144 |
| A0A024R7I0 | GIPC1   | GIPC PDZ domain containing family, member 1, isoform CRA_a OS=Homo sapiens GN=GIPC1 PE=4 SV=1      | 11.71171171 | 3  | 4  | 3  | 333  | 36.027  | 6.28 | 90    | 92.4  | 105.9 | 111.7 | 91.2  | 108.8  | 1.19298 | 0.223144 |
| Q8WXE0     | CASKIN2 | Caskin-2 OS=Homo sapiens GN=CASKIN2 PE=1 SV=2                                                      | 2.662229617 | 2  | 2  | 2  | 1202 | 126.705 | 7.09 | 89.1  | 93.3  | 115.6 | 102   | 91.2  | 108.8  | 1.19298 | 0.223144 |
| Q9BVG4     | PBDC1   | Protein PBDC1 OS=Homo sapiens GN=PBDC1 PE=1 SV=1                                                   | 5.579399142 | 1  | 1  | 1  | 233  | 26.041  | 4.79 | 86.2  | 96.2  | 110.4 | 107.2 | 91.2  | 108.8  | 1.19298 | 0.223144 |
| B2R932     |         | cDNA, FLJ94187, highly similar to Homo sapiens CD99 antigen (CD99), mRNA OS=Homo sapiens PE=2 SV=1 | 9.72972973  | 1  | 1  | 1  | 185  | 18.935  | 4.82 | 89.6  | 92.9  | 106.5 | 111.1 | 91.25 | 108.8  | 1.19233 | 0.224734 |
| H7C1D1     |         | Uncharacterized protein (Fragment) OS=Homo sapiens PE=4 SV=2                                       | 6.18556701  | 1  | 1  | 1  | 291  | 31.291  | 4.94 | 88.9  | 93.6  | 102.4 | 115.2 | 91.25 | 108.8  | 1.19233 | 0.224734 |
| Q13136     | PPFIA1  | Liprin-alpha-1 OS=Homo sapiens GN=PPFIA1 PE=1 SV=1                                                 | 14.22628952 | 11 | 16 | 11 | 1202 | 135.695 | 6.29 | 88.6  | 93.9  | 103.8 | 113.8 | 91.25 | 108.8  | 1.19233 | 0.224734 |
| P07996     | THBS1   | Thrombospondin-1 OS=Homo sapiens GN=THBS1 PE=1 SV=2                                                | 16.15384615 | 15 | 22 | 15 | 1170 | 129.3   | 4.94 | 80.3  | 102.2 | 96.1  | 121.5 | 91.25 | 108.8  | 1.19233 | 0.224734 |
| Q92688     | ANP32B  | Acidic leucine-rich nuclear phosphoprotein 32 family member B OS=Homo sapiens GN=ANP32B PE=1 SV=1  | 27.88844622 | 8  | 21 | 3  | 251  | 28.77   | 4.06 | 108.8 | 73.7  | 117.2 | 100.3 | 91.25 | 108.75 | 1.19178 | 0.226074 |
| A2N0T1     | VH6DJ   | VH6DJ protein (Fragment) OS=Homo sapiens GN=VH6DJ PE=2 SV=1                                        | 5.882352941 | 2  | 2  | 2  | 119  | 13.012  | 8.47 | 100.4 | 82.1  | 97.7  | 119.8 | 91.25 | 108.75 | 1.19178 | 0.226074 |

|                |               |                                                                                                                       |             |    |    |    |      |         |      |      |      |       |       |       |        |         |          |
|----------------|---------------|-----------------------------------------------------------------------------------------------------------------------|-------------|----|----|----|------|---------|------|------|------|-------|-------|-------|--------|---------|----------|
| A0A024R7<br>M1 | RFXAN<br>K    | Regulatory factor X-associated<br>ankyrin-containing protein, isoform<br>CRA_a OS=Homo sapiens<br>GN=RFXANK PE=4 SV=1 | 4.615384615 | 1  | 1  | 1  | 260  | 28.085  | 4.55 | 94   | 88.5 | 108.2 | 109.3 | 91.25 | 108.75 | 1.19178 | 0.226074 |
| C9JIF9         | APEH          | Acylamino-acid-releasing enzyme<br>OS=Homo sapiens GN=APEH<br>PE=1 SV=1                                               | 9.090909091 | 5  | 5  | 5  | 737  | 81.622  | 5.54 | 89.6 | 92.9 | 112.1 | 105.4 | 91.25 | 108.75 | 1.19178 | 0.226074 |
| O43414         | ERI3          | ERI1 exoribonuclease 3 OS=Homo<br>sapiens GN=ERI3 PE=1 SV=2                                                           | 6.231454006 | 2  | 3  | 2  | 337  | 37.214  | 8.07 | 96.2 | 86.4 | 115   | 102.5 | 91.3  | 108.75 | 1.19113 | 0.227678 |
| B1ALK7         | ARHGE<br>F7   | Rho guanine nucleotide exchange<br>factor 7 OS=Homo sapiens<br>GN=ARHGEF7 PE=1 SV=1                                   | 9.787234043 | 6  | 7  | 6  | 705  | 79.782  | 6.67 | 90.2 | 92.4 | 112.6 | 104.9 | 91.3  | 108.75 | 1.19113 | 0.227678 |
| O00299         | CLIC1         | Chloride intracellular channel<br>protein 1 OS=Homo sapiens<br>GN=CLIC1 PE=1 SV=4                                     | 53.94190871 | 9  | 21 | 9  | 241  | 26.906  | 5.17 | 97.7 | 84.9 | 108.9 | 108.5 | 91.3  | 108.7  | 1.19058 | 0.229031 |
| P17980         | PSMC3         | 26S protease regulatory subunit<br>6A OS=Homo sapiens<br>GN=PSMC3 PE=1 SV=3                                           | 40.77448747 | 15 | 23 | 15 | 439  | 49.172  | 5.24 | 97.4 | 85.2 | 114.6 | 102.8 | 91.3  | 108.7  | 1.19058 | 0.229031 |
| P60228         | EIF3E         | Eukaryotic translation initiation<br>factor 3 subunit E OS=Homo<br>sapiens GN=EIF3E PE=1 SV=1                         | 25.61797753 | 9  | 12 | 9  | 445  | 52.187  | 6.04 | 96.6 | 86   | 110.4 | 107   | 91.3  | 108.7  | 1.19058 | 0.229031 |
| Q9BXV9         | C14orf1<br>42 | Uncharacterized protein C14orf142<br>OS=Homo sapiens GN=C14orf142<br>PE=1 SV=2                                        | 41          | 2  | 2  | 2  | 100  | 10.852  | 4.27 | 95   | 87.6 | 107.6 | 109.8 | 91.3  | 108.7  | 1.19058 | 0.229031 |
| P14174         | MIF           | Macrophage migration inhibitory<br>factor OS=Homo sapiens GN=MIF<br>PE=1 SV=4                                         | 27.82608696 | 2  | 7  | 2  | 115  | 12.468  | 7.88 | 94.6 | 88   | 115.3 | 102.1 | 91.3  | 108.7  | 1.19058 | 0.229031 |
| Q9Y263         | PLAA          | Phospholipase A-2-activating<br>protein OS=Homo sapiens<br>GN=PLAA PE=1 SV=2                                          | 18.86792453 | 9  | 13 | 9  | 795  | 87.101  | 6.37 | 90.8 | 91.8 | 111.9 | 105.5 | 91.3  | 108.7  | 1.19058 | 0.229031 |
| E9PD50         | SMG7          | Protein SMG7 OS=Homo sapiens<br>GN=SMG7 PE=1 SV=1                                                                     | 1.452991453 | 2  | 3  | 2  | 1170 | 130.777 | 7.88 | 88.1 | 94.5 | 121.7 | 95.6  | 91.3  | 108.65 | 1.19003 | 0.23039  |

|                |             |                                                                                                                                               |             |    |    |    |     |        |      |      |      |       |       |       |        |         |          |
|----------------|-------------|-----------------------------------------------------------------------------------------------------------------------------------------------|-------------|----|----|----|-----|--------|------|------|------|-------|-------|-------|--------|---------|----------|
| A0A0S2Z4<br>A5 | MCM7        | DNA helicase (Fragment)<br>OS=Homo sapiens GN=MCM7<br>PE=2 SV=1                                                                               | 36.02225313 | 22 | 34 | 22 | 719 | 81.257 | 6.46 | 96   | 86.7 | 114.7 | 102.6 | 91.35 | 108.65 | 1.18938 | 0.232014 |
| L0R5C8         | SKA1        | Alternative protein SKA1<br>OS=Homo sapiens GN=SKA1<br>PE=4 SV=1                                                                              | 8.235294118 | 1  | 1  | 1  | 85  | 9.445  | 7.31 | 95.1 | 87.6 | 115.3 | 102   | 91.35 | 108.65 | 1.18938 | 0.232014 |
| A0A024R<br>CZ8 | KLC4        | Kinesin light chain 4, isoform<br>CRA_a OS=Homo sapiens<br>GN=KLC4 PE=4 SV=1                                                                  | 5.654281099 | 3  | 3  | 1  | 619 | 68.598 | 6.18 | 91.8 | 90.9 | 112.6 | 104.7 | 91.35 | 108.65 | 1.18938 | 0.232014 |
| Q9BXP2         | SLC12A<br>9 | Solute carrier family 12 member 9<br>OS=Homo sapiens GN=SLC12A9<br>PE=1 SV=1                                                                  | 9.628008753 | 6  | 8  | 6  | 914 | 96.049 | 8.07 | 90.3 | 92.4 | 114   | 103.3 | 91.35 | 108.65 | 1.18938 | 0.232014 |
| Q9UBK8         | MTRR        | Methionine synthase reductase<br>OS=Homo sapiens GN=MTRR<br>PE=1 SV=3                                                                         | 16.13793103 | 8  | 8  | 8  | 725 | 80.359 | 6.49 | 89.8 | 92.9 | 109.7 | 107.6 | 91.35 | 108.65 | 1.18938 | 0.232014 |
| A0A0U1R<br>RB6 | EXOC6<br>B  | Exocyst complex component 6B<br>OS=Homo sapiens GN=EXOC6B<br>PE=1 SV=1                                                                        | 6.380368098 | 4  | 4  | 4  | 815 | 94.626 | 6.46 | 88.9 | 93.8 | 109.2 | 108.1 | 91.35 | 108.65 | 1.18938 | 0.232014 |
| Q9H9S5         | FKRP        | Fukutin-related protein OS=Homo<br>sapiens GN=FKRP PE=1 SV=1                                                                                  | 4.242424242 | 2  | 2  | 2  | 495 | 54.533 | 7.4  | 88.6 | 94.1 | 87.1  | 130.2 | 91.35 | 108.65 | 1.18938 | 0.232014 |
| B3KQY7         |             | cDNA FLJ33305 fis, clone<br>BNGH42003529, highly similar to<br>E3 ubiquitin protein ligase TRAF7<br>(EC 6.3.2.-) OS=Homo sapiens<br>PE=2 SV=1 | 5.820895522 | 4  | 4  | 4  | 670 | 74.545 | 7.15 | 86.3 | 96.4 | 106   | 111.3 | 91.35 | 108.65 | 1.18938 | 0.232014 |
| Q9NP79         | VTA1        | Vacuolar protein sorting-<br>associated protein VTA1 homolog<br>OS=Homo sapiens GN=VTA1<br>PE=1 SV=1                                          | 28.01302932 | 6  | 11 | 6  | 307 | 33.858 | 6.29 | 86.1 | 96.6 | 108.6 | 108.7 | 91.35 | 108.65 | 1.18938 | 0.232014 |
| A0A140VJ<br>T2 |             | Testicular tissue protein Li 158<br>OS=Homo sapiens PE=2 SV=1                                                                                 | 5.535055351 | 1  | 1  | 1  | 271 | 29.798 | 5.74 | 84.9 | 97.8 | 109.2 | 108.1 | 91.35 | 108.65 | 1.18938 | 0.232014 |

|                |               |                                                                                                  |             |    |    |    |      |         |      |      |      |       |       |       |        |         |          |
|----------------|---------------|--------------------------------------------------------------------------------------------------|-------------|----|----|----|------|---------|------|------|------|-------|-------|-------|--------|---------|----------|
| B5BUi8         | DUSP3         | Dual specificity phosphatase 3<br>(Fragment) OS=Homo sapiens<br>GN=DUSP3 PE=2 SV=1               | 21.62162162 | 3  | 3  | 3  | 185  | 20.564  | 8.15 | 88.7 | 94   | 109.1 | 108.1 | 91.35 | 108.6  | 1.18883 | 0.233387 |
| A0A140VJ<br>M4 | KCTD12        | Potassium channel tetramerisation<br>domain containing 12 OS=Homo<br>sapiens GN=KCTD12 PE=2 SV=1 | 8.307692308 | 2  | 2  | 2  | 325  | 35.679  | 5.64 | 93.1 | 89.7 | 115.5 | 101.8 | 91.4  | 108.65 | 1.18873 | 0.233646 |
| A0A140VJ<br>E6 |               | Guanylate cyclase OS=Homo<br>sapiens PE=2 SV=1                                                   | 10.74458058 | 9  | 9  | 9  | 1061 | 118.844 | 6.64 | 91.1 | 91.7 | 105.8 | 111.5 | 91.4  | 108.65 | 1.18873 | 0.233646 |
| P13929         | ENO3          | Beta-enolase OS=Homo sapiens<br>GN=ENO3 PE=1 SV=5                                                | 14.51612903 | 4  | 19 | 1  | 434  | 46.957  | 7.71 | 98.6 | 84.2 | 106.4 | 110.8 | 91.4  | 108.6  | 1.18818 | 0.235025 |
| A0A0K0K<br>1K4 | HEL-S-<br>276 | Proteasome subunit alpha type<br>OS=Homo sapiens GN=HEL-S-<br>276 PE=2 SV=1                      | 56.0483871  | 12 | 22 | 12 | 248  | 27.87   | 8.46 | 96.9 | 85.9 | 115.5 | 101.7 | 91.4  | 108.6  | 1.18818 | 0.235025 |
